# Supplementary material for: The Disulfidptosis-Mediated Intercellular Communication in the Tumor Microenvironment Contributes to the Progression of Osteosarcoma and Immunotherapy
Source: Preprints.org preprint supplement (doi:10.20944/preprints202306.1915.v1), 2023-06-27
Supplement: Supplementary file 1 [file Supplementary table1.xls]

## Sheet: Sheet1
disul_celltype	marker
ACTN4+CAF-C1	ACTN4
ACTN4+CAF-C1	TLN1
ACTN4+CAF-C1	COL4A1
ACTN4+CAF-C1	ADIRF
ACTN4+CAF-C1	IGFBP7
ACTN4+CAF-C1	C11orf96
ACTN4+CAF-C1	ACTA2
ACTN4+CAF-C1	TAGLN
ACTN4+CAF-C1	MMP9
ACTN4+CAF-C1	SPP1
MYH10+CAF-C2	MYH10
MYH10+CAF-C2	TLN1
TLN1+CAF-C3	TLN1
TLN1+CAF-C3	MYH9
TLN1+CAF-C3	THY1
TLN1+CAF-C3	C11orf96
TLN1+CAF-C3	COL4A1
TLN1+CAF-C3	IGFBP7
TLN1+CAF-C3	UACA
TLN1+CAF-C3	MMP13
TLN1+CAF-C3	MMP9
IQGAP1+CAF-C4	IQGAP1
IQGAP1+CAF-C4	TLN1
IQGAP1+CAF-C4	CCND2
IQGAP1+CAF-C4	CCDC102B
IQGAP1+CAF-C4	THY1
IQGAP1+CAF-C4	LHFPL6
IQGAP1+CAF-C4	UACA
IQGAP1+CAF-C4	CYGB
IQGAP1+CAF-C4	ITGB1
IQGAP1+CAF-C4	COL18A1
IQGAP1+CAF-C4	C11orf96
IQGAP1+CAF-C4	CD81
IQGAP1+CAF-C4	JUND
IQGAP1+CAF-C4	MCAM
IQGAP1+CAF-C4	COL4A1
IQGAP1+CAF-C4	FN1
IQGAP1+CAF-C4	PDGFRB
IQGAP1+CAF-C4	IGFBP7
IQGAP1+CAF-C4	SPON2
IQGAP1+CAF-C4	COL4A2
IQGAP1+CAF-C4	MMP9
IQGAP1+CAF-C4	CCL3L1
IQGAP1+CAF-C4	TAGLN
IQGAP1+CAF-C4	BHLHE41
IQGAP1+CAF-C4	HSPA1A
IQGAP1+CAF-C4	IFI27
IQGAP1+CAF-C4	SSPN
IQGAP1+CAF-C4	MT2A
IQGAP1+CAF-C4	MGP
IQGAP1+CAF-C4	ASPN
IQGAP1+CAF-C4	MMP13
IQGAP1+CAF-C4	IQGAP1
IQGAP1+CAF-C4	SFRP2
ACTN4+CAF-C1	ACTN4
ACTN4+CAF-C1	IFITM5
ACTN4+CAF-C1	GSTA1
ACTN4+CAF-C1	AOC2
ACTN4+CAF-C1	GAPDH
ACTN4+CAF-C1	NDUFA4L2
MYH10+CAF-C2	MYH10
MYH10+CAF-C2	IFITM5
MYH10+CAF-C2	GSTA1
TLN1+CAF-C3	TLN1
TLN1+CAF-C3	CAPZB
ACTN4+CAF-C1	ACTN4
ACTN4+CAF-C1	MYH9
IQGAP1+CAF-C4	IQGAP1
IQGAP1+CAF-C4	MYH9
IQGAP1+CAF-C4	POSTN
MYH10+CAF-C2	MYH10
MYH10+CAF-C2	MYH9
MYH10+CAF-C2	EGFL6
FLNA+CAF-C5	FLNA
FLNA+CAF-C5	DSTN
FLNA+CAF-C5	MT-ND5
MYH9+CAF-C6	MYH9
MYH9+CAF-C6	FLNA
MYH9+CAF-C6	LPCAT1
MYH9+CAF-C6	A2M
MYH9+CAF-C6	MYH9
MYH9+CAF-C6	SFRP2
MYH9+CAF-C6	SNORC
MYH9+CAF-C6	S100A1
MYH9+CAF-C6	SCRG1
MYH9+CAF-C6	COL11A1
MYH9+CAF-C6	COL1A2
MYH9+CAF-C6	THBS2
MYH9+CAF-C6	RPS4Y1
MYH9+CAF-C6	COL2A1
MYH9+CAF-C6	COL1A1
MYH9+CAF-C6	MT-ND3
MYH9+CAF-C6	LRRC75A
MYH9+CAF-C6	NFIX
MYH9+CAF-C6	PRELP
MYH9+CAF-C6	COL3A1
FLNA+CAF-C5	FLNA
FLNA+CAF-C5	SNORC
FLNA+CAF-C5	MT-ND3
FLNA+CAF-C5	MT-ATP6
FLNA+CAF-C5	S100A1
FLNA+CAF-C5	COL2A1
FLNA+CAF-C5	COL1A2
FLNA+CAF-C5	CFH
FLNA+CAF-C5	COL11A1
FLNA+CAF-C5	CTGF
FLNA+CAF-C5	COL1A1
FLNA+CAF-C5	CAMK2D
FLNA+CAF-C5	COL12A1
FLNA+CAF-C5	COMP
FLNA+CAF-C5	HMGB2
FLNA+CAF-C5	RPS4Y1
FLNA+CAF-C5	FLNA
FLNA+CAF-C5	SCRG1
FLNA+CAF-C5	COMP
FLNA+CAF-C5	COL2A1
FLNA+CAF-C5	S100A1
FLNA+CAF-C5	MATN3
FLNA+CAF-C5	COL11A1
FLNA+CAF-C5	SFRP2
FLNA+CAF-C5	THBS4
FLNA+CAF-C5	MT-ND3
FLNA+CAF-C5	THBS2
FLNA+CAF-C5	SEMA3C
FLNA+CAF-C5	PRELP
FLNA+CAF-C5	EFEMP1
FLNA+CAF-C5	SPON1
FLNA+CAF-C5	COL12A1
FLNA+CAF-C5	MT-ATP6
FLNA+CAF-C5	COL1A1
FLNA+CAF-C5	STX10
FLNA+CAF-C5	THBS1
FLNA+CAF-C5	COL1A2
CAPZB+CAF-C7	CAPZB
CAPZB+CAF-C7	S100A1
CAPZB+CAF-C7	SFRP2
CAPZB+CAF-C7	LRRC75A
CAPZB+CAF-C7	SCRG1
CAPZB+CAF-C7	PLA2G2A
CAPZB+CAF-C7	C3
CAPZB+CAF-C7	FTL
CAPZB+CAF-C7	IGF1
CAPZB+CAF-C7	NRP2
CAPZB+CAF-C7	RPS28
CAPZB+CAF-C7	TPT1
CAPZB+CAF-C7	TYROBP
CAPZB+CAF-C7	VMP1
FLNA+CAF-C5	FLNA
FLNA+CAF-C5	SNORC
FLNA+CAF-C5	S100A1
FLNA+CAF-C5	COL2A1
FLNA+CAF-C5	SFRP2
FLNA+CAF-C5	RPS28
FLNA+CAF-C5	RPS4Y1
FLNA+CAF-C5	COL11A1
FLNA+CAF-C5	COL1A2
FLNA+CAF-C5	HIST1H1B
FLNA+CAF-C5	MT-ND3
FLNA+CAF-C5	S100A6
FLNA+CAF-C5	RPL37
FLNA+CAF-C5	COL1A1
FLNA+CAF-C5	SCG2
FLNA+CAF-C5	MATN3
FLNA+CAF-C5	RPS23
FLNA+CAF-C5	MMP9
FLNA+CAF-C5	TPT1
FLNA+CAF-C5	CFD
FLNA+CAF-C5	S100A4
FLNA+CAF-C5	SPARC
FLNA+CAF-C5	MFAP5
FLNA+CAF-C5	IL17B
FLNA+CAF-C5	GPNMB
FLNA+CAF-C5	ACKR3
FLNA+CAF-C5	THBS4
FLNA+CAF-C5	MRPS15
FLNA+CAF-C5	VDAC1
FLNA+CAF-C5	ITGB5
FLNA+CAF-C5	PHB
FLNA+CAF-C5	COL12A1
FLNA+CAF-C5	ZRANB2
FLNA+CAF-C5	THBS3
FLNA+CAF-C5	PILRB
FLNA+CAF-C5	HSPA5
FLNA+CAF-C5	LRRC75A
FLNA+CAF-C5	COMP
FLNA+CAF-C5	MT-ATP6
FLNA+CAF-C5	PSMB4
FLNA+CAF-C5	COPS3
FLNA+CAF-C5	DNAJC19
FLNA+CAF-C5	BOD1
FLNA+CAF-C5	APRT
FLNA+CAF-C5	GNG11
FLNA+CAF-C5	CCT3
FLNA+CAF-C5	VASN
FLNA+CAF-C5	PSMG2
FLNA+CAF-C5	FDX1
FLNA+CAF-C5	FSCN1
FLNA+CAF-C5	GADD45GIP1
FLNA+CAF-C5	PCSK5
FLNA+CAF-C5	SPON1
FLNA+CAF-C5	COL6A3
FLNA+CAF-C5	GSTO1
FLNA+CAF-C5	PPT1
FLNA+CAF-C5	FMOD
FLNA+CAF-C5	LEPROTL1
FLNA+CAF-C5	RBPJ
FLNA+CAF-C5	TMEM183A
FLNA+CAF-C5	C3
FLNA+CAF-C5	LYRM4
FLNA+CAF-C5	PRELP
ACTN4+CAF-C1	ACTN4
ACTN4+CAF-C1	S100A1
ACTN4+CAF-C1	SNORC
ACTN4+CAF-C1	SFRP2
ACTN4+CAF-C1	RPS28
ACTN4+CAF-C1	MFAP5
ACTN4+CAF-C1	SCRG1
ACTN4+CAF-C1	COL2A1
ACTN4+CAF-C1	HSF4
ACTN4+CAF-C1	LAMA2
ACTN4+CAF-C1	COMP
ACTN4+CAF-C1	SCG2
ACTN4+CAF-C1	MT-ND3
ACTN4+CAF-C1	POSTN
ACTN4+CAF-C1	RPS4Y1
ACTN4+CAF-C1	TPT1
ACTN4+CAF-C1	COL1A2
ACTN4+CAF-C1	RPS23
ACTN4+CAF-C1	OGT
ACTN4+CAF-C1	SEMA3C
ACTN4+CAF-C1	LRRC75A
ACTN4+CAF-C1	IGF1
ACTN4+CAF-C1	RARRES2
ACTN4+CAF-C1	APOD
ACTN4+CAF-C1	COL1A1
ACTN4+CAF-C1	SFRP1
ACTN4+CAF-C1	FNDC1
ACTN4+CAF-C1	DYNC2H1
ACTN4+CAF-C1	TNC
ACTN4+CAF-C1	MEG3
ACTN4+CAF-C1	SPARC
ACTN4+CAF-C1	EFEMP1
CAPZB+CAF-C7	CAPZB
CAPZB+CAF-C7	SNORC
CAPZB+CAF-C7	S100A1
CAPZB+CAF-C7	TNFRSF25
CAPZB+CAF-C7	RPS28
CAPZB+CAF-C7	COL1A2
CAPZB+CAF-C7	COL11A1
CAPZB+CAF-C7	PI16
CAPZB+CAF-C7	RPL37A
CAPZB+CAF-C7	SFRP2
CAPZB+CAF-C7	RPL37
CAPZB+CAF-C7	COL12A1
CAPZB+CAF-C7	C3
CAPZB+CAF-C7	COL1A1
CAPZB+CAF-C7	ANLN
CAPZB+CAF-C7	COMP
CAPZB+CAF-C7	SYNGAP1
CAPZB+CAF-C7	PLTP
CAPZB+CAF-C7	TSHZ2
CAPZB+CAF-C7	PHKG1
CAPZB+CAF-C7	MIEF2
CAPZB+CAF-C7	COL2A1
CAPZB+CAF-C7	SPON1
CAPZB+CAF-C7	PAPSS2
CAPZB+CAF-C7	COL9A2
CAPZB+CAF-C7	PSMA5
CAPZB+CAF-C7	SPARC
CAPZB+CAF-C7	HSPH1
CAPZB+CAF-C7	TMA16
CAPZB+CAF-C7	FBRS
CAPZB+CAF-C7	MFAP5
CAPZB+CAF-C7	MZT2A
CAPZB+CAF-C7	MYCBP2
CAPZB+CAF-C7	DCTD
CAPZB+CAF-C7	TPM3
CAPZB+CAF-C7	BTAF1
CAPZB+CAF-C7	RAPH1
CAPZB+CAF-C7	NUPR1
CAPZB+CAF-C7	MT-ND3
DSTN+CD4+T_cells-C1	DSTN
DSTN+CD4+T_cells-C1	YAF2
TLN1+CD4+T_cells-C2	TLN1
TLN1+CD4+T_cells-C2	CD2AP
TLN1+CD4+T_cells-C2	TAF15
MYH9+CD4+T_cells-C3	MYH9
MYH9+CD4+T_cells-C3	CAPZB
MYH9+CD4+T_cells-C3	IQGAP1
CAPZB+CD8+T_cells-C1	CAPZB
DSTN+CD8+T_cells-C2	DSTN
DSTN+CD8+T_cells-C2	FXYD5
DSTN+CD8+T_cells-C2	BNIP3L
DSTN+CD8+T_cells-C2	SRM
FLNA+CD8+T_cells-C3	FLNA
FLNA+CD8+T_cells-C3	ACTN4
FLNA+CD8+T_cells-C3	UCP2
FLNA+CD8+T_cells-C3	SUN2
TLN1+CD8+T_cells-C4	TLN1
TLN1+CD8+T_cells-C4	ABR
TLN1+CD8+T_cells-C4	MKRN1
TLN1+CD8+T_cells-C4	CCDC69
TLN1+CD8+T_cells-C4	CLECL1
TLN1+CD8+T_cells-C4	FH
TLN1+CD8+T_cells-C4	LRPAP1
TLN1+CD8+T_cells-C4	UBE2J1
TLN1+CD8+T_cells-C4	ZNF207
TLN1+CD8+T_cells-C4	UBR4
TLN1+CD8+T_cells-C4	TMEM173
TLN1+CD8+T_cells-C4	ZFC3H1
TLN1+CD8+T_cells-C4	ZYX
TLN1+CD8+T_cells-C4	SS18
TLN1+CD8+T_cells-C4	RAP1A
TLN1+CD8+T_cells-C4	ANXA11
TLN1+CD8+T_cells-C4	AKAP11
TLN1+CD8+T_cells-C4	FBXW7
MYH9+CD8+T_cells-C5	MYH9
MYH9+CD8+T_cells-C5	CCDC97
MYH9+CD8+T_cells-C5	ATAD2
MYH9+CD8+T_cells-C5	ANKRD17
MYH9+CD8+T_cells-C5	CIC
MYH9+CD8+T_cells-C5	AC093323.1
MYH9+CD8+T_cells-C5	NLRP1
MYH9+CD8+T_cells-C5	RAD51C
MYH9+CD8+T_cells-C5	NANS
MYH9+CD8+T_cells-C5	AC136475.3
MYH9+CD8+T_cells-C5	CTSZ
MYH9+CD8+T_cells-C5	QARS
MYH9+CD8+T_cells-C5	NUB1
MYH9+CD8+T_cells-C5	CDK13
MYH9+CD8+T_cells-C5	NFKB2
MYH9+CD8+T_cells-C5	CCDC43
MYH9+CD8+T_cells-C5	COPS7A
MYH9+CD8+T_cells-C5	EPRS
MYH9+CD8+T_cells-C5	CASP8AP2
MYH9+CD8+T_cells-C5	UBAP2
MYH9+CD8+T_cells-C5	AC097376.2
MYH9+CD8+T_cells-C5	PSMC6
MYH9+CD8+T_cells-C5	LPCAT1
MYH9+CD8+T_cells-C5	TAF3
MYH9+CD8+T_cells-C5	C1GALT1
MYH9+CD8+T_cells-C5	KCNQ1OT1
MYH9+CD8+T_cells-C5	AC245297.3
MYH9+CD8+T_cells-C5	CD101
MYH9+CD8+T_cells-C5	WWP2
MYH9+CD8+T_cells-C5	DYNC1I2
MYH9+CD8+T_cells-C5	AL357060.1
MYH9+CD8+T_cells-C5	ZNF831
MYH9+CD8+T_cells-C5	PDHB
MYH9+CD8+T_cells-C5	INPP4A
MYH9+CD8+T_cells-C5	FAM160B2
MYH9+CD8+T_cells-C5	MAF1
CD2AP+CD8+T_cells-C6	CD2AP
CD2AP+CD8+T_cells-C6	RSAD1
CD2AP+CD8+T_cells-C6	TJP1
CD2AP+CD8+T_cells-C6	MPP6
CD2AP+CD8+T_cells-C6	EMILIN1
CD2AP+CD8+T_cells-C6	PDRG1
CD2AP+CD8+T_cells-C6	FBXW5
CD2AP+CD8+T_cells-C6	UBE2R2
CD2AP+CD8+T_cells-C6	TRIM23
CD2AP+CD8+T_cells-C6	PYCR2
CD2AP+CD8+T_cells-C6	MLH1
CD2AP+CD8+T_cells-C6	SPN
CD2AP+CD8+T_cells-C6	ABCC10
CD2AP+CD8+T_cells-C6	APBB1IP
CD2AP+CD8+T_cells-C6	GATAD2A
CD2AP+CD8+T_cells-C6	COPB1
CD2AP+CD8+T_cells-C6	CDC42
CD2AP+CD8+T_cells-C6	TRIM22
CD2AP+CD8+T_cells-C6	SMC3
CD2AP+CD8+T_cells-C6	CGAS
CD2AP+CD8+T_cells-C6	UFD1
CD2AP+CD8+T_cells-C6	UBE2E3
CD2AP+CD8+T_cells-C6	SRSF6
CD2AP+CD8+T_cells-C6	ZBTB7A
CD2AP+CD8+T_cells-C6	ELN
CD2AP+CD8+T_cells-C6	FCGRT
CD2AP+CD8+T_cells-C6	R3HDM2
CD2AP+CD8+T_cells-C6	RUFY1
CD2AP+CD8+T_cells-C6	VSIR
CD2AP+CD8+T_cells-C6	MED17
CD2AP+CD8+T_cells-C6	CEP250
CD2AP+CD8+T_cells-C6	PPP3CA
CD2AP+CD8+T_cells-C6	EEF1AKMT2
CD2AP+CD8+T_cells-C6	CNTRL
CD2AP+CD8+T_cells-C6	NNT
CD2AP+CD8+T_cells-C6	EIF4B
CD2AP+CD8+T_cells-C6	UBR1
CD2AP+CD8+T_cells-C6	RALGAPB
CD2AP+CD8+T_cells-C6	CACUL1
CD2AP+CD8+T_cells-C6	PDHA1
CD2AP+CD8+T_cells-C6	SSBP4
CD2AP+CD8+T_cells-C6	TXLNA
CD2AP+CD8+T_cells-C6	PCNX2
CD2AP+CD8+T_cells-C6	CCT3
CD2AP+CD8+T_cells-C6	TSPYL1
CD2AP+CD8+T_cells-C6	NDUFB5
CD2AP+CD8+T_cells-C6	SEL1L3
CD2AP+CD8+T_cells-C6	SUPT5H
CD2AP+CD8+T_cells-C6	LLPH
CD2AP+CD8+T_cells-C6	MRPL40
CD2AP+CD8+T_cells-C6	AK6
CD2AP+CD8+T_cells-C6	USP14
CD2AP+CD8+T_cells-C6	PTN
CD2AP+CD8+T_cells-C6	ANKRD13A
IQGAP1+CD8+T_cells-C7	IQGAP1
IQGAP1+CD8+T_cells-C7	SSH1
IQGAP1+CD8+T_cells-C7	TESMIN
IQGAP1+CD8+T_cells-C7	FTSJ3
IQGAP1+CD8+T_cells-C7	ZNF91
IQGAP1+CD8+T_cells-C7	GUF1
IQGAP1+CD8+T_cells-C7	LETM2
IQGAP1+CD8+T_cells-C7	LTA4H
IQGAP1+CD8+T_cells-C7	ADIRF
IQGAP1+CD8+T_cells-C7	ALG1
IQGAP1+CD8+T_cells-C7	MBD1
IQGAP1+CD8+T_cells-C7	OAS3
IQGAP1+CD8+T_cells-C7	SMU1
IQGAP1+CD8+T_cells-C7	TMEM156
IQGAP1+CD8+T_cells-C7	PYHIN1
IQGAP1+CD8+T_cells-C7	SLC30A9
IQGAP1+CD8+T_cells-C7	UBAP2L
IQGAP1+CD8+T_cells-C7	GADD45G
IQGAP1+CD8+T_cells-C7	C16orf91
IQGAP1+CD8+T_cells-C7	VCPIP1
IQGAP1+CD8+T_cells-C7	ZBTB44
IQGAP1+CD8+T_cells-C7	PMM1
IQGAP1+CD8+T_cells-C7	SMIM27
IQGAP1+CD8+T_cells-C7	POLM
IQGAP1+CD8+T_cells-C7	KMT5C
IQGAP1+CD8+T_cells-C7	ESS2
IQGAP1+CD8+T_cells-C7	EAPP
IQGAP1+CD8+T_cells-C7	ARIH2OS
IQGAP1+CD8+T_cells-C7	AL135925.1
IQGAP1+CD8+T_cells-C7	HNRNPA2B1
IQGAP1+CD8+T_cells-C7	SLC25A26
IQGAP1+CD8+T_cells-C7	BCL3
IQGAP1+CD8+T_cells-C7	LRP1
IQGAP1+CD8+T_cells-C7	APAF1
IQGAP1+CD8+T_cells-C7	LMAN1
IQGAP1+CD8+T_cells-C7	KDM5B
IQGAP1+CD8+T_cells-C7	STAT6
IQGAP1+CD8+T_cells-C7	SERPINB9
IQGAP1+CD8+T_cells-C7	TMEM202-AS1
IQGAP1+CD8+T_cells-C7	RMND1
IQGAP1+CD8+T_cells-C7	CKLF
IQGAP1+CD8+T_cells-C7	NR2C1
IQGAP1+CD8+T_cells-C7	NR4A1
IQGAP1+CD8+T_cells-C7	HEXB
IQGAP1+CD8+T_cells-C7	STK19
IQGAP1+CD8+T_cells-C7	ATP6V1F
IQGAP1+CD8+T_cells-C7	TMEM248
IQGAP1+CD8+T_cells-C7	NOC4L
IQGAP1+CD8+T_cells-C7	ZNF316
IQGAP1+CD8+T_cells-C7	TRAPPC1
IQGAP1+CD8+T_cells-C7	CALU
IQGAP1+CD8+T_cells-C7	TARSL2
IQGAP1+CD8+T_cells-C7	EXT1
IQGAP1+CD8+T_cells-C7	NELFB
IQGAP1+CD8+T_cells-C7	PHF11
IQGAP1+CD8+T_cells-C7	OGFR
IQGAP1+CD8+T_cells-C7	ETS1
IQGAP1+CD8+T_cells-C7	PXN
IQGAP1+CD8+T_cells-C7	COPS2
IQGAP1+CD8+T_cells-C7	FBXO5
IQGAP1+CD8+T_cells-C7	NUDCD3
IQGAP1+CD8+T_cells-C7	SSH2
DSTN+T-reg_cells-C1	DSTN
DSTN+T-reg_cells-C1	MYH9
DSTN+T-reg_cells-C1	EIF3G
DSTN+T-reg_cells-C1	NACA
DSTN+T-reg_cells-C1	RPL7A
DSTN+T-reg_cells-C1	MED16
DSTN+T-reg_cells-C1	ZADH2
DSTN+T-reg_cells-C1	PACS1
DSTN+T-reg_cells-C1	EIF1AY
DSTN+T-reg_cells-C1	MRPL15
DSTN+T-reg_cells-C1	SEPT2
DSTN+T-reg_cells-C1	C1QB
DSTN+T-reg_cells-C1	TIAL1
DSTN+T-reg_cells-C1	RPL30
DSTN+T-reg_cells-C1	MARCKS
DSTN+T-reg_cells-C1	JUND
DSTN+T-reg_cells-C1	CAMTA1
DSTN+T-reg_cells-C1	UQCRB
DSTN+T-reg_cells-C1	CHST11
DSTN+T-reg_cells-C1	CKB
DSTN+T-reg_cells-C1	ANP32B
DSTN+T-reg_cells-C1	PDCD2
DSTN+T-reg_cells-C1	TPT1
DSTN+T-reg_cells-C1	TTF1
DSTN+T-reg_cells-C1	GSTP1
DSTN+T-reg_cells-C1	HDDC3
DSTN+T-reg_cells-C1	NFKB2
DSTN+T-reg_cells-C1	GPSM3
DSTN+T-reg_cells-C1	C3orf38
DSTN+T-reg_cells-C1	RBM6
DSTN+T-reg_cells-C1	SPTLC2
DSTN+T-reg_cells-C1	CACYBP
DSTN+T-reg_cells-C1	CD276
DSTN+T-reg_cells-C1	HPGD
DSTN+T-reg_cells-C1	IBSP
DSTN+T-reg_cells-C1	FAM46A
DSTN+T-reg_cells-C1	PDCD6
DSTN+T-reg_cells-C1	ARL4C
DSTN+T-reg_cells-C1	FABP5
DSTN+T-reg_cells-C1	IKZF4
DSTN+T-reg_cells-C1	MAP2K2
DSTN+T-reg_cells-C1	DAZAP2
DSTN+T-reg_cells-C1	MMP9
DSTN+T-reg_cells-C1	CYC1
DSTN+T-reg_cells-C1	ILF2
DSTN+T-reg_cells-C1	DCN
DSTN+T-reg_cells-C1	MRPL18
DSTN+T-reg_cells-C1	HPCAL1
DSTN+T-reg_cells-C1	SNHG12
DSTN+T-reg_cells-C1	HSPA1A
DSTN+T-reg_cells-C1	RASAL3
DSTN+T-reg_cells-C1	ALKBH7
DSTN+T-reg_cells-C1	TOMM20
DSTN+T-reg_cells-C1	HLA-E
DSTN+T-reg_cells-C1	GNAS
DSTN+T-reg_cells-C1	MRPL3
DSTN+T-reg_cells-C1	ECI1
DSTN+T-reg_cells-C1	COPA
DSTN+T-reg_cells-C1	UFD1
DSTN+T-reg_cells-C1	SMIM12
DSTN+T-reg_cells-C1	HSPA1B
DSTN+T-reg_cells-C1	COL9A2
DSTN+T-reg_cells-C1	PTPN18
DSTN+T-reg_cells-C1	ZFAND2A
DSTN+T-reg_cells-C1	ARRDC1
DSTN+T-reg_cells-C1	RBM42
DSTN+T-reg_cells-C1	COX8A
DSTN+T-reg_cells-C1	C1orf53
DSTN+T-reg_cells-C1	NDUFS5
DSTN+T-reg_cells-C1	TPM2
DSTN+T-reg_cells-C1	MED28
DSTN+T-reg_cells-C1	ARMC10
DSTN+T-reg_cells-C1	TMEM18
DSTN+T-reg_cells-C1	DPP8
DSTN+T-reg_cells-C1	LOX
DSTN+T-reg_cells-C1	GTF2I
DSTN+T-reg_cells-C1	AC090152.1
DSTN+T-reg_cells-C1	UBE2B
DSTN+T-reg_cells-C1	SDHD
DSTN+T-reg_cells-C1	HSPE1
DSTN+T-reg_cells-C1	GRN
DSTN+T-reg_cells-C1	C19orf70
DSTN+T-reg_cells-C1	NECAP2
DSTN+T-reg_cells-C1	PSMB5
DSTN+T-reg_cells-C1	PPM1K
DSTN+T-reg_cells-C1	CCT3
DSTN+T-reg_cells-C1	GOLGB1
DSTN+T-reg_cells-C1	MT-ND4L
DSTN+T-reg_cells-C1	ATP6V0D1
DSTN+T-reg_cells-C1	COMMD4
DSTN+T-reg_cells-C1	KRR1
DSTN+T-reg_cells-C1	IFITM5
DSTN+T-reg_cells-C1	SSR3
DSTN+T-reg_cells-C1	CTSD
DSTN+T-reg_cells-C1	TOR1AIP2
DSTN+T-reg_cells-C1	SAMHD1
DSTN+T-reg_cells-C1	SRSF3
DSTN+T-reg_cells-C1	TECR
DSTN+T-reg_cells-C1	SSR2
DSTN+T-reg_cells-C1	RABIF
DSTN+T-reg_cells-C1	CTSK
DSTN+T-reg_cells-C1	EVL
DSTN+T-reg_cells-C1	FAM43A
DSTN+T-reg_cells-C1	MTDH
DSTN+T-reg_cells-C1	RHOB
DSTN+T-reg_cells-C1	WDR6
DSTN+T-reg_cells-C1	MZT2A
DSTN+T-reg_cells-C1	PPP1R2
DSTN+T-reg_cells-C1	DDHD1
DSTN+T-reg_cells-C1	CCT5
DSTN+T-reg_cells-C1	PLIN2
DSTN+T-reg_cells-C1	VPS13C
DSTN+T-reg_cells-C1	CHMP3
DSTN+T-reg_cells-C1	UBAC1
DSTN+T-reg_cells-C1	C16orf87
DSTN+T-reg_cells-C1	PHF19
DSTN+T-reg_cells-C1	ILF3
DSTN+T-reg_cells-C1	SH3GLB1
DSTN+T-reg_cells-C1	RTN3
DSTN+T-reg_cells-C1	OXLD1
DSTN+T-reg_cells-C1	DNAJB4
DSTN+T-reg_cells-C1	EZH2
DSTN+T-reg_cells-C1	UBAC2
DSTN+T-reg_cells-C1	HSP90AA1
DSTN+T-reg_cells-C1	WAS
DSTN+T-reg_cells-C1	LAMTOR2
DSTN+T-reg_cells-C1	KATNA1
DSTN+T-reg_cells-C1	RILPL2
DSTN+T-reg_cells-C1	TNFAIP8
DSTN+T-reg_cells-C1	LIMS1
DSTN+T-reg_cells-C1	CENPW
DSTN+T-reg_cells-C1	EPSTI1
DSTN+T-reg_cells-C1	POLR2H
DSTN+T-reg_cells-C1	BAG3
DSTN+T-reg_cells-C1	MORC3
DSTN+T-reg_cells-C1	TNKS2
DSTN+T-reg_cells-C1	TCEAL9
TLN1+T-reg_cells-C2	TLN1
TLN1+T-reg_cells-C2	IQGAP1
TLN1+T-reg_cells-C2	BAZ1A
TLN1+T-reg_cells-C2	CTSB
TLN1+T-reg_cells-C2	PPP1R14B
TLN1+T-reg_cells-C2	TCEA1
TLN1+T-reg_cells-C2	MAZ
TLN1+T-reg_cells-C2	SBDS
TLN1+T-reg_cells-C2	APOC1
TLN1+T-reg_cells-C2	FAM3C
TLN1+T-reg_cells-C2	PIK3R1
TLN1+T-reg_cells-C2	EIF4B
TLN1+T-reg_cells-C2	HSPA1A
TLN1+T-reg_cells-C2	SSB
TLN1+T-reg_cells-C2	CDC40
TLN1+T-reg_cells-C2	ACP5
TLN1+T-reg_cells-C2	TAC3
TLN1+T-reg_cells-C2	PSMD2
TLN1+T-reg_cells-C2	SPP1
TLN1+T-reg_cells-C2	CCDC47
TLN1+T-reg_cells-C2	ANKIB1
TLN1+T-reg_cells-C2	CCL4
TLN1+T-reg_cells-C2	CNPY2
TLN1+T-reg_cells-C2	TRAM1
TLN1+T-reg_cells-C2	SSNA1
TLN1+T-reg_cells-C2	HCLS1
TLN1+T-reg_cells-C2	HNRNPR
TLN1+T-reg_cells-C2	ATP5F1C
TLN1+T-reg_cells-C2	RPL30
TLN1+T-reg_cells-C2	MT-ND4L
TLN1+T-reg_cells-C2	HSP90AA1
TLN1+T-reg_cells-C2	MT-ATP6
TLN1+T-reg_cells-C2	ATF3
TLN1+T-reg_cells-C2	CDV3
TLN1+T-reg_cells-C2	MAX
TLN1+T-reg_cells-C2	SNHG7
TLN1+T-reg_cells-C2	GIGYF2
TLN1+T-reg_cells-C2	HIST1H4C
TLN1+T-reg_cells-C2	PARK7
TLN1+T-reg_cells-C2	HSPH1
TLN1+T-reg_cells-C2	KDELR1
TLN1+T-reg_cells-C2	CHORDC1
TLN1+T-reg_cells-C2	HSP90AB1
TLN1+T-reg_cells-C2	PRDX6
TLN1+T-reg_cells-C2	DFFA
TLN1+T-reg_cells-C2	PTMS
TLN1+T-reg_cells-C2	ID3
TLN1+T-reg_cells-C2	RRP36
TLN1+T-reg_cells-C2	B4GALT4
TLN1+T-reg_cells-C2	MT-ND3
TLN1+T-reg_cells-C2	TPM2
TLN1+T-reg_cells-C2	RNF113A
TLN1+T-reg_cells-C2	CTCF
TLN1+T-reg_cells-C2	COCH
TLN1+T-reg_cells-C2	PLPBP
TLN1+T-reg_cells-C2	PJA2
TLN1+T-reg_cells-C2	RNF213
TLN1+T-reg_cells-C2	TMEM259
TLN1+T-reg_cells-C2	NABP1
TLN1+T-reg_cells-C2	CD81
TLN1+T-reg_cells-C2	KDM5B
TLN1+T-reg_cells-C2	ZFR
TLN1+T-reg_cells-C2	WDR55
TLN1+T-reg_cells-C2	ISCU
TLN1+T-reg_cells-C2	C8orf59
TLN1+T-reg_cells-C2	LAMTOR1
TLN1+T-reg_cells-C2	KAT8
TLN1+T-reg_cells-C2	RGCC
TLN1+T-reg_cells-C2	AP2S1
TLN1+T-reg_cells-C2	SSU72
TLN1+T-reg_cells-C2	RAB21
TLN1+T-reg_cells-C2	LARS
TLN1+T-reg_cells-C2	BCL11B
TLN1+T-reg_cells-C2	SURF1
TLN1+T-reg_cells-C2	HSPA1B
TLN1+T-reg_cells-C2	SDHA
TLN1+T-reg_cells-C2	ZBTB1
TLN1+T-reg_cells-C2	VIM
TLN1+T-reg_cells-C2	EIF4A3
TLN1+T-reg_cells-C2	HLA-DQA2
TLN1+T-reg_cells-C2	CD2AP
TLN1+T-reg_cells-C2	PABPC4
TLN1+T-reg_cells-C2	BTG2
TLN1+T-reg_cells-C2	TNFSF9
TLN1+T-reg_cells-C2	RNF126
TLN1+T-reg_cells-C2	PPIB
TLN1+T-reg_cells-C2	RNF19A
TLN1+T-reg_cells-C2	TAF10
TLN1+T-reg_cells-C2	ARFGAP3
TLN1+T-reg_cells-C2	FAM32A
TLN1+T-reg_cells-C2	ODC1
TLN1+T-reg_cells-C2	SEPT11
TLN1+T-reg_cells-C2	ASXL2
TLN1+T-reg_cells-C2	NPM1
TLN1+T-reg_cells-C2	LYPLA1
TLN1+T-reg_cells-C2	C1QA
TLN1+T-reg_cells-C2	TUFM
TLN1+T-reg_cells-C2	ARPC1A
TLN1+T-reg_cells-C2	TFG
TLN1+T-reg_cells-C2	PYCR2
TLN1+T-reg_cells-C2	CHCHD5
TLN1+T-reg_cells-C2	DEDD2
TLN1+T-reg_cells-C2	GRWD1
TLN1+T-reg_cells-C2	RNH1
TLN1+T-reg_cells-C2	GBP3
TLN1+T-reg_cells-C2	SELENOW
TLN1+T-reg_cells-C2	ACIN1
TLN1+T-reg_cells-C2	PLCB2
TLN1+T-reg_cells-C2	KDELR2
TLN1+T-reg_cells-C2	MYDGF
TLN1+T-reg_cells-C2	HNRNPC
TLN1+T-reg_cells-C2	APOE
TLN1+T-reg_cells-C2	JOSD1
TLN1+T-reg_cells-C2	SRPK1
TLN1+T-reg_cells-C2	TMED3
TLN1+T-reg_cells-C2	TUBA1C
TLN1+T-reg_cells-C2	COL1A1
TLN1+T-reg_cells-C2	IDI1
TLN1+T-reg_cells-C2	CNDP2
TLN1+T-reg_cells-C2	ATP1B3
TLN1+T-reg_cells-C2	SOST
TLN1+T-reg_cells-C2	NECAP1
TLN1+T-reg_cells-C2	BCAS2
TLN1+T-reg_cells-C2	GTF3C6
TLN1+T-reg_cells-C2	RPL7L1
TLN1+T-reg_cells-C2	FAM162A
TLN1+T-reg_cells-C2	RNF5
TLN1+T-reg_cells-C2	HM13
TLN1+T-reg_cells-C2	PPP1R2
TLN1+T-reg_cells-C2	SYNE2
TLN1+T-reg_cells-C2	CELF2
TLN1+T-reg_cells-C2	JAK1
TLN1+T-reg_cells-C2	CKB
TLN1+T-reg_cells-C2	KDM2A
TLN1+T-reg_cells-C2	DNAJA2
TLN1+T-reg_cells-C2	SRSF4
TLN1+T-reg_cells-C2	COMT
TLN1+T-reg_cells-C2	MXD4
TLN1+T-reg_cells-C2	GNAS
TLN1+T-reg_cells-C2	IER5
TLN1+T-reg_cells-C2	DCAF15
TLN1+T-reg_cells-C2	JTB
TLN1+T-reg_cells-C2	FIP1L1
TLN1+T-reg_cells-C2	CYLD
TLN1+T-reg_cells-C2	FKBP11
TLN1+T-reg_cells-C2	CTSK
TLN1+T-reg_cells-C2	LYSMD3
TLN1+T-reg_cells-C2	MT-ND1
TLN1+T-reg_cells-C2	CXCR3
TLN1+T-reg_cells-C2	HSPA8
TLN1+T-reg_cells-C2	PRDM2
TLN1+T-reg_cells-C2	ZCCHC11
TLN1+T-reg_cells-C2	MAD2L1
TLN1+T-reg_cells-C2	SELENOM
TLN1+T-reg_cells-C2	SMCHD1
TLN1+T-reg_cells-C2	MUC20-OT1
TLN1+T-reg_cells-C2	PNN
TLN1+T-reg_cells-C2	LCK
TLN1+T-reg_cells-C2	GLYR1
TLN1+T-reg_cells-C2	TP53I13
TLN1+T-reg_cells-C2	PTCD3
TLN1+T-reg_cells-C2	PPP4R2
TLN1+T-reg_cells-C2	TPT1
TLN1+T-reg_cells-C2	PLGRKT
TLN1+T-reg_cells-C2	RACK1
TLN1+T-reg_cells-C2	CHCHD10
TLN1+T-reg_cells-C2	ARHGAP30
TLN1+T-reg_cells-C2	SPTAN1
TLN1+T-reg_cells-C2	SPARC
TLN1+T-reg_cells-C2	MAGOHB
TLN1+T-reg_cells-C2	NDUFAF8
TLN1+T-reg_cells-C2	VASP
TLN1+T-reg_cells-C2	NTMT1
TLN1+T-reg_cells-C2	FUBP1
TLN1+T-reg_cells-C2	PSMA5
TLN1+T-reg_cells-C2	COL5A2
TLN1+T-reg_cells-C2	DDIT3
TLN1+T-reg_cells-C2	TNIP1
TLN1+T-reg_cells-C2	RAB8B
TLN1+T-reg_cells-C2	SLC35D2
TLN1+T-reg_cells-C2	TNFRSF1B
TLN1+T-reg_cells-C2	LCP1
TLN1+T-reg_cells-C2	CCDC50
TLN1+T-reg_cells-C2	TAGAP
TLN1+T-reg_cells-C2	JUND
TLN1+T-reg_cells-C2	TCEAL4
TLN1+T-reg_cells-C2	SNRNP70
TLN1+T-reg_cells-C2	GPNMB
TLN1+T-reg_cells-C2	TMEM14C
TLN1+T-reg_cells-C2	C15orf40
TLN1+T-reg_cells-C2	PCMT1
TLN1+T-reg_cells-C2	CD63
TLN1+T-reg_cells-C2	FIS1
TLN1+T-reg_cells-C2	ZNRD1
TLN1+T-reg_cells-C2	NIPBL
TLN1+T-reg_cells-C2	KPNA4
TLN1+T-reg_cells-C2	NUCKS1
TLN1+T-reg_cells-C2	CD151
TLN1+T-reg_cells-C2	EIF5A
TLN1+T-reg_cells-C2	MRPL23
TLN1+T-reg_cells-C2	RGS16
TLN1+T-reg_cells-C2	CORO1B
TLN1+T-reg_cells-C2	GBP5
TLN1+T-reg_cells-C2	TBC1D2B
TLN1+T-reg_cells-C2	SIRT2
TLN1+T-reg_cells-C2	VPS25
TLN1+T-reg_cells-C2	DDX17
TLN1+T-reg_cells-C2	HSPD1
TLN1+T-reg_cells-C2	FAAP20
TLN1+T-reg_cells-C2	MPV17
TLN1+T-reg_cells-C2	NEK7
TLN1+T-reg_cells-C2	SNX6
TLN1+T-reg_cells-C2	RBMX2
TLN1+T-reg_cells-C2	USP15
TLN1+T-reg_cells-C2	GOPC
TLN1+T-reg_cells-C2	EEF1B2
TLN1+T-reg_cells-C2	HES4
TLN1+T-reg_cells-C2	BACE2
TLN1+T-reg_cells-C2	TRMT10B
TLN1+T-reg_cells-C2	EIF5A2
TLN1+T-reg_cells-C2	RING1
TLN1+T-reg_cells-C2	MTPN
TLN1+T-reg_cells-C2	LAYN
TLN1+T-reg_cells-C2	TAPBPL
TLN1+T-reg_cells-C2	TRIP12
TLN1+T-reg_cells-C2	CNPY3
TLN1+T-reg_cells-C2	MAP7D1
TLN1+T-reg_cells-C2	LRPAP1
TLN1+T-reg_cells-C2	PSMB7
TLN1+T-reg_cells-C2	FOXP1
TLN1+T-reg_cells-C2	APBB1IP
TLN1+T-reg_cells-C2	CD84
TLN1+T-reg_cells-C2	PPID
TLN1+T-reg_cells-C2	RIT1
TLN1+T-reg_cells-C2	PCBD1
TLN1+T-reg_cells-C2	SNAP29
TLN1+T-reg_cells-C2	PUF60
TLN1+T-reg_cells-C2	PITPNB
TLN1+T-reg_cells-C2	HSPA6
TLN1+T-reg_cells-C2	DNAJC1
TLN1+T-reg_cells-C2	MRPL15
TLN1+T-reg_cells-C2	RBM38
TLN1+T-reg_cells-C2	NRBP1
TLN1+T-reg_cells-C2	SNF8
TLN1+T-reg_cells-C2	CREM
TLN1+T-reg_cells-C2	FAM96A
TLN1+T-reg_cells-C2	COPB2
TLN1+T-reg_cells-C2	CISH
TLN1+T-reg_cells-C2	CA3
TLN1+T-reg_cells-C2	HNRNPA3
TLN1+T-reg_cells-C2	TMEM263
TLN1+T-reg_cells-C2	IFRD2
TLN1+T-reg_cells-C2	DDAH2
TLN1+T-reg_cells-C2	TERF1
TLN1+T-reg_cells-C2	IFRD1
TLN1+T-reg_cells-C2	DTD1
TLN1+T-reg_cells-C2	NPAT
TLN1+T-reg_cells-C2	EPS8L2
TLN1+T-reg_cells-C2	SNX5
TLN1+T-reg_cells-C2	TRABD
TLN1+T-reg_cells-C2	UBE2Q1
TLN1+T-reg_cells-C2	MAT2A
TLN1+T-reg_cells-C2	RYK
TLN1+T-reg_cells-C2	CFAP36
TLN1+T-reg_cells-C2	SDHC
TLN1+T-reg_cells-C2	PLIN2
TLN1+T-reg_cells-C2	DDX3Y
TLN1+T-reg_cells-C2	HARS
TLN1+T-reg_cells-C2	LAIR2
TLN1+T-reg_cells-C2	NCOA3
TLN1+T-reg_cells-C2	CWC15
TLN1+T-reg_cells-C2	WAPL
TLN1+T-reg_cells-C2	PDCD6
TLN1+T-reg_cells-C2	PLK3
TLN1+T-reg_cells-C2	ANXA1
TLN1+T-reg_cells-C2	IFNG
CAPZB+T-reg_cells-C3	CAPZB
CAPZB+T-reg_cells-C3	RAD51B
CAPZB+T-reg_cells-C3	PRAF2
CAPZB+T-reg_cells-C3	TMBIM1
CAPZB+T-reg_cells-C3	MSH2
CAPZB+T-reg_cells-C3	PMS1
CAPZB+T-reg_cells-C3	AP5Z1
CAPZB+T-reg_cells-C3	TRAPPC8
CAPZB+T-reg_cells-C3	ZNF544
CAPZB+T-reg_cells-C3	LINC02001
CAPZB+T-reg_cells-C3	SCYL3
CAPZB+T-reg_cells-C3	PPDPF
CAPZB+T-reg_cells-C3	TMEM107
CAPZB+T-reg_cells-C3	RPL21
CAPZB+T-reg_cells-C3	SUB1
CAPZB+T-reg_cells-C3	SEC13
CAPZB+T-reg_cells-C3	RRN3
CAPZB+T-reg_cells-C3	SMCO4
CAPZB+T-reg_cells-C3	NME7
CAPZB+T-reg_cells-C3	CNOT11
CAPZB+T-reg_cells-C3	USP24
CAPZB+T-reg_cells-C3	AC006449.6
CAPZB+T-reg_cells-C3	LINC00239
CAPZB+T-reg_cells-C3	CREBL2
CAPZB+T-reg_cells-C3	PICK1
CAPZB+T-reg_cells-C3	IFITM2
CAPZB+T-reg_cells-C3	GMNN
FLNA+NK_cells-C1	FLNA
FLNA+NK_cells-C1	KLRG1
FLNA+NK_cells-C1	CYB561D2
FLNA+NK_cells-C1	EMP3
FLNA+NK_cells-C1	FGFBP2
FLNA+NK_cells-C1	SRP72
FLNA+NK_cells-C1	CCL4
FLNA+NK_cells-C1	CCL4L2
ACTN4+NK_cells-C2	ACTN4
ACTN4+NK_cells-C2	FAM136A
ACTN4+NK_cells-C2	SPINK2
ACTN4+NK_cells-C2	CTSW
ACTN4+NK_cells-C2	KLRC2
ACTN4+NK_cells-C2	XCL1
ACTN4+NK_cells-C2	TNFRSF18
ACTN4+NK_cells-C2	CEP350
ACTN4+NK_cells-C2	PLK2
ACTN4+NK_cells-C2	XCL2
ACTN4+NK_cells-C2	SDF4
ACTN4+NK_cells-C2	TSPO
ACTN4+NK_cells-C2	HOPX
ACTN4+NK_cells-C2	UFM1
ACTN4+NK_cells-C2	GNLY
MYH9+NK_cells-C3	MYH9
MYH9+NK_cells-C3	BATF
MYH9+NK_cells-C3	PRKACB
MYH9+NK_cells-C3	RIF1
MYH9+NK_cells-C3	AIMP1
MYH9+NK_cells-C3	TNF
MYH9+NK_cells-C3	SLC50A1
MYH9+NK_cells-C3	PHYH
CAPZB+NK_cells-C4	CAPZB
CAPZB+NK_cells-C4	PPP2CB
CAPZB+NK_cells-C4	PPIL3
CAPZB+NK_cells-C4	DSTN
CAPZB+NK_cells-C4	RAN
CAPZB+NK_cells-C4	ARRDC1
CAPZB+NK_cells-C4	SRPRB
CAPZB+NK_cells-C4	CREBZF
CAPZB+NK_cells-C4	TBC1D2B
CAPZB+NK_cells-C4	TSR3
CAPZB+NK_cells-C4	IFNG
CAPZB+NK_cells-C4	SDC2
CAPZB+NK_cells-C4	PDAP1
CAPZB+NK_cells-C4	LSM12
CAPZB+NK_cells-C4	LSP1
CAPZB+NK_cells-C4	LAPTM4B
CAPZB+NK_cells-C4	GRHPR
CAPZB+NK_cells-C4	EIF4EBP1
CAPZB+NK_cells-C4	DKK1
CAPZB+NK_cells-C4	MMP13
TLN1+NK_cells-C5	TLN1
TLN1+NK_cells-C5	APTX
TLN1+NK_cells-C5	WASHC1
TLN1+NK_cells-C5	SENP6
TLN1+NK_cells-C5	USP24
TLN1+NK_cells-C5	AFF4
TLN1+NK_cells-C5	PRKRA
TLN1+NK_cells-C5	EIF2D
TLN1+NK_cells-C5	SEC62
TLN1+NK_cells-C5	TMEM30A
TLN1+NK_cells-C5	DDX50
TLN1+NK_cells-C5	ATG4D
TLN1+NK_cells-C5	ZNF394
TLN1+NK_cells-C5	CENPX
TLN1+NK_cells-C5	SARS
TLN1+NK_cells-C5	MRPS25
TLN1+NK_cells-C5	NFU1
CD2AP+NK_cells-C6	CD2AP
CD2AP+NK_cells-C6	TRIQK
CD2AP+NK_cells-C6	MVD
CD2AP+NK_cells-C6	LTC4S
CD2AP+NK_cells-C6	PSIP1
CD2AP+NK_cells-C6	ZNF721
CD2AP+NK_cells-C6	HIST1H2AC
CD2AP+NK_cells-C6	DDX21
CD2AP+NK_cells-C6	ETS1
CD2AP+NK_cells-C6	TAGLN2
CD2AP+NK_cells-C6	B3GNT2
CD2AP+NK_cells-C6	ZDHHC24
CD2AP+NK_cells-C6	APOPT1
CD2AP+NK_cells-C6	LTV1
CD2AP+NK_cells-C6	SRRM1
CD2AP+NK_cells-C6	HAUS2
CD2AP+NK_cells-C6	MACO1
CD2AP+NK_cells-C6	DTX3L
CD2AP+NK_cells-C6	PFKL
CD2AP+NK_cells-C6	HOXB2
CD2AP+NK_cells-C6	ERCC1
CD2AP+NK_cells-C6	IDH3B
CD2AP+NK_cells-C6	SORL1
CD2AP+NK_cells-C6	SSR1
CD2AP+NK_cells-C6	EIF2A
CD2AP+NK_cells-C6	PDIA6
CD2AP+NK_cells-C6	RAB29
CD2AP+NK_cells-C6	PHTF2
IQGAP1+NK_cells-C7	IQGAP1
IQGAP1+NK_cells-C7	MLYCD
IQGAP1+NK_cells-C7	THY1
IQGAP1+NK_cells-C7	METTL4
IQGAP1+NK_cells-C7	KIF1C
IQGAP1+NK_cells-C7	TRAPPC12
IQGAP1+NK_cells-C7	ERCC4
IQGAP1+NK_cells-C7	PIGH
IQGAP1+NK_cells-C7	PLEKHB2
IQGAP1+NK_cells-C7	GID4
IQGAP1+NK_cells-C7	CTU1
IQGAP1+NK_cells-C7	WHRN
IQGAP1+NK_cells-C7	ASXL2
IQGAP1+NK_cells-C7	WDR61
IQGAP1+NK_cells-C7	SERGEF
IQGAP1+NK_cells-C7	CHD7
IQGAP1+NK_cells-C7	ZNF672
IQGAP1+NK_cells-C7	KCTD13
IQGAP1+NK_cells-C7	UGCG
IQGAP1+NK_cells-C7	VTI1A
IQGAP1+NK_cells-C7	COMMD9
IQGAP1+NK_cells-C7	FGD5-AS1
IQGAP1+NK_cells-C7	AFF1
IQGAP1+NK_cells-C7	PNP
IQGAP1+NK_cells-C7	SNUPN
IQGAP1+NK_cells-C7	EXOSC1
IQGAP1+NK_cells-C7	BRI3
IQGAP1+NK_cells-C7	HOXA10
IQGAP1+NK_cells-C7	GIGYF2
IQGAP1+NK_cells-C7	CD8A
IQGAP1+NK_cells-C7	TNRC6B
IQGAP1+NK_cells-C7	ARFIP2
IQGAP1+NK_cells-C7	NSA2
IQGAP1+NK_cells-C7	TMIGD2
IQGAP1+NK_cells-C7	RFLNB
IQGAP1+NK_cells-C7	ANXA7
IQGAP1+NK_cells-C7	CMPK1
IQGAP1+NK_cells-C7	ACOT7
IQGAP1+NK_cells-C7	MYO1G
IQGAP1+NK_cells-C7	MED25
IQGAP1+NK_cells-C7	SEC16A
IQGAP1+NK_cells-C7	HAVCR2
IQGAP1+NK_cells-C7	ATP5F1A
IQGAP1+NK_cells-C7	C1orf35
IQGAP1+NK_cells-C7	MAN1A2
IQGAP1+NK_cells-C7	PNISR
IQGAP1+NK_cells-C7	SNHG25
IQGAP1+NK_cells-C7	UBE2A
ACTN4+Mac_C1	ACTN4
ACTN4+Mac_C1	HIST1H4C
INF2+Mac_C2	INF2
INF2+Mac_C2	SPP1
INF2+Mac_C2	RNASE1
FLNA+Mac_C3	FLNA
FLNA+Mac_C3	FCN1
FLNA+Mac_C3	APOBEC3A
FLNA+Mac_C3	S100A8
FLNA+Mac_C3	BCL2A1
FLNA+Mac_C3	CD52
FLNA+Mac_C3	G0S2
FLNA+Mac_C3	S100A9
