# Supplementary material for: The Disulfidptosis-Mediated Intercellular Communication in the Tumor Microenvironment Contributes to the Progression of Osteosarcoma and Immunotherapy
Source: Preprints.org preprint supplement (doi:10.20944/preprints202306.1915.v1), 2023-06-27
Supplement: Supplementary file 2 [file Supplementary table2.xls]

## Sheet: Sheet1
CD4 signature genes
CD4_exhau	PDCD1
CD4_exhau	CXCL13
CD4_exhau	CLTA4
CD4_exhau	BTLA
CD4_exhau	RNF19A
CD4_exhau	NR3C1
CD4_exhau	LIMS1
CD4_exhau	SRGN
CD4_exhau	IL21
CD4_exhau	ITM2A
CD4_exhau	TOX
CD4_exhau	BHLHE40-AS1
CD4_exhau	SARDH
CD4_exhau	DUSP4
CD4_exhau	TIGIT
CD4_exhau	IFNGAMMA
CD4_exhau	RBPJ
CD4_exhau	MAF
CD4_exhau	PTPN11
CD4_exhau	RGS1
CD4_exhau	RGS2
CD4_exhau	C9ORF16
CD4_exhau	ZBED2
CD4_exhau	IGFLR1
CD4_exhau	METTL8
CD4_exhau	KCNK5
CD4_exhau	TNFSF8
CD4_exhau	KIAA0247
CD4_exhau	LINC00892
CD4_exhau	UNQ6494
CD4_exhau	ITGB2-AS1
CD4_exhau	LINC00963
CD4_exhau	FKBP1A-SDCBP2
CD4_exhau	NUTF2
CD4_exhau	CDKN2A
CD4_exhau	AKR1A1
CD4_exhau	ZNF211
CD4_exhau	BATF
CD4_exhau	DNPH1
CD4_exhau	MTHFD2
CD4_exhau	YWHAQ
CD4_exhau	CHN1
CD4_exhau	LYST
CD4_exhau	MIR155HG
CD4_exhau	GBP4
CD4_exhau	YWHAQ
CD4_exhau	CHN1
CD4_exhau	LYST
CD4_exhau	MIR155HG
CD4_exhau	GBP4
CD4_exhau	DDX5
CD4_exhau	DR1
CD4_exhau	RILPL2
CD4_exhau	F2R
CD4_exhau	IKZF3
CD4_exhau	FKBP5
CD4_exhau	TBC1D2B
CD4_exhau	SMC5
CD4_exhau	COTL1
CD4_exhau	TMEM2
CD4_exhau	ALOX5AP
CD4_exhau	FUT8
CD4_exhau	GAPDH
CD4_exhau	CKAP2
CD4_exhau	PDE7B
CD4_exhau	ALOX5AP
CD4_exhau	FUT8
CD4_exhau	GAPDH
CD4_exhau	CKAP2
CD4_exhau	PDE7B
CD4_exhau	ALOX5AP
CD4_exhau	FUT8
CD4_exhau	GAPDH
CD4_exhau	CKAP2
CD4_exhau	PDE7B
CD4_exhau	IL6ST
CD4_exhau	ITGA2
CD4_exhau	ITPR1
CD4_exhau	CD82
CD4_exhau	LASP1
CD4_exhau	DTHD1
CD4_exhau	IRAG2
CD4_exhau	CD200
CD4_exhau	MYO7A
CD4_exhau	NAB1
CD4_exhau	NAP1L4
CD4_exhau	NFATC1
CD4_exhau	OGG1
CD4_exhau	ATP5C1
CD4_exhau	LAP3
CD4_exhau	NAP1L4
CD4_exhau	NFATC1
CD4_exhau	OGG1
CD4_exhau	ATP5C1
CD4_exhau	LAP3
CD4_exhau	NAP1L4
CD4_exhau	NFATC1
CD4_exhau	OGG1
CD4_exhau	ATP5C1
CD4_exhau	LAP3
CD4_exhau	NAP1L4
CD4_exhau	NFATC1
CD4_exhau	OGG1
CD4_exhau	ATP5C1
CD4_exhau	LAP3
CD4_exhau	PHTF2
CD4_exhau	PSME2
CD4_exhau	RHBDD2
CD4_exhau	PTPN13
CD4_exhau	PTPRC
CD4_exhau	SQOR
CD4_exhau	ATXN1
CD4_exhau	CCL4
CD4_exhau	THADA
CD4_exhau	TSPYL2
CD4_exhau	SQOR
CD4_exhau	ATXN1
CD4_exhau	CCL4
CD4_exhau	THADA
CD4_exhau	TSPYL2
CD4_exhau	TBXAS1
CD4_exhau	ZEB1
CD4_exhau	TPI1
CD4_exhau	TRAF3
CD4_exhau	TRPS1
CD4_exhau	UQCRH
CD4_exhau	WARS
CD4_exhau	MAPKAPK3
CD4_exhau	MRPL57
CD4_exhau	TMEM243
CD4_exhau	UQCRH
CD4_exhau	WARS
CD4_exhau	MAPKAPK3
CD4_exhau	MRPL57
CD4_exhau	TMEM243
CD4_exhau	MAP1LC3A
CD4_exhau	HAVCR2
CD4_exhau	TOX2
CD4_exhau	CAMK1
CD4_exhau	ADAM19
CD4_exhau	MAP1LC3A
CD4_exhau	HAVCR2
CD4_exhau	TOX2
CD4_exhau	CAMK1
CD4_exhau	ADAM19
CD4_exhau	NMI
CD4_exhau	PTTG1
CD4_exhau	UBE2L6
CD4_exhau	SFXN1
CD4_exhau	EPSTI1
CD4_exhau	AKAP5
CD4_exhau	CD38
CD4_exhau	ENTPD1
CD4_exhau	SPOCK2
CD4_exhau	TBC1D4
CD4_exhau	RABGAP1L
CD4_cyto	CD4
CD4_cyto	GZMH
CD4_cyto	GZMB
CD4_cyto	GNLY
CD4_cyto	GZMA
CD4_cyto	NKG7
CD4_cyto	PRF1
CD4_cyto	LOC100130872
CD4_cyto	ZEB2-AS1
CD4_cyto	TM4SF19-TCTEX1D2
CD4_cyto	ARL4C
CD4_cyto	KLRG1
CD4_cyto	SPON2
CD4_cyto	NPRL2
CD4_cyto	LILRB1
CD4_cyto	DSTN
CD4_cyto	PRSS23
CD4_cyto	RASSF1
CD4_cyto	CD300A
CD4_cyto	OSBPL5
CD4_cyto	TM4SF19
CD4_cyto	CTSW
CD4_cyto	CX3CR1
CD4_cyto	ADRB2
CD4_cyto	SAMD3
CD4_cyto	TTC16
CD4_cyto	FUT11
CD4_cyto	PATL2
CD4_cyto	A2M
CD4_cyto	ABCA2
CD4_cyto	ADGRG5
CD4_cyto	FCG3RA
CD4_cyto	FGR
CD4_cyto	SYNE2
CD4_cyto	SYNE1
CD4_cyto	ADGRG5
CD4_cyto	FCG3RA
CD4_cyto	FGR
CD4_cyto	SYNE2
CD4_cyto	SYNE1
CD4_cyto	ADGRG5
CD4_cyto	FCG3RA
CD4_cyto	FGR
CD4_cyto	SYNE2
CD4_cyto	SYNE1
CD4_cyto	ADGRG5
CD4_cyto	FCG3RA
CD4_cyto	FGR
CD4_cyto	SYNE2
CD4_cyto	SYNE1
CD4_cyto	MYBL1
CD4_cyto	PAFAH2
CD4_cyto	ABI3
CD4_cyto	CD244
CD4_cyto	PLEK
CD4_cyto	S1PR5
CD4_cyto	TTC38
CD4_cyto	CHST12
CD4_cyto	LYAR
CD4_cyto	AGPAT4
CD4_cyto	S1PR5
CD4_cyto	TTC38
CD4_cyto	CHST12
CD4_cyto	LYAR
CD4_cyto	AGPAT4
CD4_cyto	S1PR5
CD4_cyto	TTC38
CD4_cyto	CHST12
CD4_cyto	LYAR
CD4_cyto	AGPAT4
CD4_cyto	S1PR5
CD4_cyto	TTC38
CD4_cyto	CHST12
CD4_cyto	LYAR
CD4_cyto	AGPAT4
CD4_cyto	SLC2A
CD4_cyto	SPN
CD4_cyto	TGFBR3
CD4_cyto	VCL
CD4_cyto	AHNAK
CD4_cyto	EFHD2
CD4_cyto	LPCAT1
CD4_cyto	C1ORF21
CD4_cyto	FGFBP2
CD4_cyto	CEP78
CD4_cyto	EFHD2
CD4_cyto	LPCAT1
CD4_cyto	C1ORF21
CD4_cyto	FGFBP2
CD4_cyto	CEP78
CD4_cyto	ADGRG1
CD4_cyto	SH3BP5
CD4_cyto	LITAF
CD4_cyto	ZEB2
CD4_eff-positive	GZMA
CD4_eff-positive	ANXA1
CD4_eff-memory	CD4
CD4_eff-memory	CD3D
CD4_eff-memory	GZMA
CD4_eff-memory	ANXA1
CD4_eff-memory	PTPRC
CD4_eff-memory	CD52
CD4_eff-memory	CXCR6
CD4_eff-memory	CRR7
CD4_eff-memory	GRP183
CD4_eff-memory	ANKRD28
CD4_eff-memory	GZMH
CD4_eff-memory	GZMK
CD4_eff-memory	IL-7R
CD4_eff-memory	AQP3
CD4_eff-memory	LTB
CD4_eff-memory	S100A4
CD4_eff-memory	CCL5
CD4_eff-memory	PRDM1
CD4_eff-memory	TIMP1
CD4_eff-memory	TNFRSF4
CD4_eff-memory	EOMES
CD8 signature genes
CD8_exhau	HAVCR2
CD8_exhau	CXCL13
CD8_exhau	CCL3
CD8_exhau	SIRPG
CD8_exhau	IFNG
CD8_exhau	TIGIT
CD8_exhau	GZMB
CD8_exhau	PDCD1
CD8_exhau	PARK7
CD8_exhau	TNFRSF9
CD8_exhau	ACP5
CD8_exhau	CTLA4
CD8_exhau	RBPJ
CD8_exhau	MIR155
CD8_exhau	CXCR6
CD8_exhau	CD27
CD8_exhau	FKBP1A
CD8_exhau	BST2
CD8_exhau	TPI1
CD8_exhau	MIR155HG
CD8_exhau	PTTG1
CD8_exhau	CD63
CD8_exhau	SAMSN1
CD8_exhau	RGS1
CD8_exhau	CD27-AS1
CD8_exhau	ITGAE
CD8_exhau	MIR4632
CD8_exhau	HLA-DRA
CD8_exhau	IGFLR1
CD8_exhau	KRT86
CD8_exhau	ENTPD1
CD8_exhau	DUSP4
CD8_exhau	SIT1
CD8_exhau	TOX
CD8_exhau	PHLDA1
CD8_exhau	CCND2
CD8_exhau	GPR25
CD8_exhau	LAYN
CD8_exhau	PRDX5
CD8_exhau	SARDH
CD8_exhau	FASLG
CD8_exhau	MIR3917
CD8_exhau	ANXA5
CD8_exhau	CTSD
CD8_exhau	PDIA6
CD8_exhau	RANBP1
CD8_exhau	FKBP1A-SDCBP2
CD8_exhau	COTL1
CD8_exhau	TNFRSF1B
CD8_exhau	IDH2
CD8_exhau	CD38
CD8_exhau	CD82
CD8_exhau	LAG3
CD8_exhau	MIR497HG
CD8_exhau	APOBEC3C
CD8_exhau	ITM2A
CD8_exhau	COX5A
CD8_exhau	IFI35
CD8_exhau	NDFIP2
CD8_exhau	TNFRSF18
CD8_exhau	KRT81
CD8_exhau	DNPH1
CD8_exhau	RGS2
CD8_exhau	HMGN1
CD8_exhau	DYNLL1
CD8_exhau	SNRPB
CD8_exhau	STRA13
CD8_exhau	SYNGR2
CD8_exhau	RAB27A
CD8_exhau	PSMC3
CD8_exhau	GALM
CD8_exhau	FABP5
CD8_exhau	UBE2L6
CD8_exhau	MYO7A
CD8_exhau	PRDX3
CD8_exhau	DDIT4
CD8_exhau	STMN1
CD8_exhau	CDK2AP2
CD8_exhau	VCAM1
CD8_exhau	SNAP47
CD8_exhau	PSMB3
CD8_exhau	ISG15
CD8_exhau	HLA-DRB5
CD8_exhau	CKS2
CD8_exhau	TNIP3
CD8_exhau	CD7
CD8_exhau	PSMD4
CD8_exhau	ATP6V1C2
CD8_exhau	PSMD8
CD8_exhau	HLA-DRB6
CD8_cytoto	PRF1
CD8_cytoto	IFNG
CD8_cytoto	GNLY
CD8_cytoto	NKG7
CD8_cytoto	GZMB
CD8_cytoto	GZMA
CD8_cytoto	GZMH
CD8_cytoto	KLRK1
CD8_cytoto	KLRB1
CD8_cytoto	KLRD1
CD8_cytoto	CTSW
CD8_cytoto	CST7
CD8_eff-positive	GZMK
CD8_eff-positive	CD8A
CD8_eff-positive	CD3D
CD8_eff-positive	GZMA
CD8_eff-positive	KLRB1
CD8_eff-memory	CD8A
CD8_eff-memory	LAT
CD8_eff-memory	GZMK
CD8_eff-memory	NKG7
CD8_eff-memory	CD8B
CD8_eff-memory	GZMB
CD8_eff-memory	GNLY
CD8_eff-memory	GZMH
CD8_eff-memory	PRF1
CD8_eff-memory	ZEB2-AS1
CD8_eff-memory	SH3BP5-AS1
CD8_eff-memory	TM4SF19-TCTEX1D2
CD8_eff-memory	ADAM8
CD8_eff-memory	ARL4C
CD8_eff-memory	RGS19
CD8_eff-memory	SPON2
CD8_eff-memory	CD52
CD8_eff-memory	LILRB1
CD8_eff-memory	DSTN
CD8_eff-memory	PRSS23
CD8_eff-memory	CEP78
CD8_eff-memory	CX3CR1
CD8_eff-memory	DSTN
CD8_eff-memory	EFHD2
CD8_eff-memory	EMP3
CD8_eff-memory	FCG3RA
CD8_eff-memory	FCGR3B
CD8_eff-memory	FCRL6
CD8_eff-memory	FGFBP2
CD8_eff-memory	FGR
CD8_eff-memory	FLNA
CD8_eff-memory	FUT11
CD8_eff-memory	GAB3
CD8_eff-memory	GK5
CD8_eff-memory	GLUL
CD8_eff-memory	GNLY
CD8_eff-memory	GZMA
CD8_eff-memory	GZMB
CD8_eff-memory	GZMH
CD8_eff-memory	GZMK
CD8_eff-memory	GZMM
CD8_eff-memory	ITGAM
CD8_eff-memory	KCNAB2
CD8_eff-memory	KLRD1
CD8_eff-memory	KLRF1
CD8_eff-memory	LAT
CD8_eff-memory	LGALS1
CD8_eff-memory	LILRB1
CD8_eff-memory	LITAF
CD8_eff-memory	LLGL2
CD8_eff-memory	LPCAT1
CD8_eff-memory	LUZP6
CD8_eff-memory	MBP
CD8_eff-memory	MTSS1
CD8_eff-memory	MYO1F
CD8_eff-memory	MYO1G
CD8_eff-memory	NKG7
CD8_eff-memory	OSBPL5
CD8_eff-memory	PATL2
CD8_eff-memory	PIK3R5
CD8_eff-memory	PLEK
CD8_eff-memory	PLEKHG3
CD8_eff-memory	PRF1
CD8_eff-memory	PRKCB
CD8_eff-memory	PRSS23
CD8_eff-memory	PXN
CD8_eff-memory	RAP1B
CD8_eff-memory	RAP1GAP2
CD8_eff-memory	RAP2B
CD8_eff-memory	RASSF1
CD8_eff-memory	RGS19
CD8_eff-memory	RNF166
CD8_eff-memory	S1PR5
CD8_eff-memory	SAMD3
CD8_eff-memory	SH3BP5
CD8_eff-memory	SH3BP5-AS1
CD8_eff-memory	SLC2A
CD8_eff-memory	SLC9A3R1
CD8_eff-memory	SLCO4C1
CD8_eff-memory	SPON2
CD8_eff-memory	SRPK2
CD8_eff-memory	STK10
CD8_eff-memory	SYNE1
CD8_eff-memory	TAGLN2
CD8_eff-memory	TBX21
NK signature genes
T_exhau	LAG3
T_exhau	PDCD1
T_exhau	TIGIT
T_exhau	HAVCR2
T_exhau	CLTA4
T_exhau	ENTPD1
T_exhau	CXCL13
T_exhau	TNFRSF9
T_exhau	LYST
T_exhau	SNAP47
T_exhau	DGKH
T_exhau	DUSP4
T_exhau	GZMB
T_exhau	ITGAE
T_exhau	RGS1
T_exhau	P75
T_exhau	VCAM1
T_exhau	IGFLR1
T_exhau	CBLB
T_exhau	CD8A
T_exhau	ITM2A
T_exhau	TOX
T_exhau	FAM3C
T_exhau	ETV1
T_exhau	FABP5
T_exhau	COTL1
T_exhau	RNF19A
T_exhau	OSBPL3
T_exhau	GBP2
T_exhau	IFI16
T_exhau	IFNGAMMA
T_exhau	ARNT
T_exhau	CD200
T_exhau	GFOD1
T_exhau	SIRPG
T_exhau	RAB27A
T_exhau	RGS2
T_exhau	STAT3
T_exhau	TPI1
T_exhau	TRAF5
T_exhau	TOX2
T_exhau	CD3E
T_exhau	CD8B
T_exhau	CD27
T_exhau	AKAP5
T_exhau	CD38
T_exhau	MIR497HG
T_exhau	FKBP1A-SDCBP2
T_exhau	MIR4632
T_exhau	PDIA6
T_exhau	IRF9
T_exhau	BATF
T_exhau	CXCR6
T_exhau	PARK7
T_exhau	MIR155HG
T_exhau	CD307C
T_exhau	GALM
T_exhau	LAYN
T_exhau	CTSD
T_exhau	SARDH
T_exhau	EWSR1
T_exhau	FKBP1A
T_exhau	PHLDA1
T_exhau	INPP5F
T_exhau	EID1
T_exhau	PRDX5
T_exhau	DFNB31
T_exhau	PDE7B
T_exhau	GLDC
T_exhau	APOBEC3C
T_exhau	ICOS
T_exhau	SLC2A8
T_exhau	ANXA5
T_exhau	HLA-DMA
T_exhau	HLA-DRB6
T_exhau	ID3
T_exhau	IDH2
T_exhau	IFI35
T_exhau	RBPJ
T_exhau	FASLG
T_exhau	ID3
T_exhau	IDH2
T_exhau	IFI35
T_exhau	RBPJ
T_exhau	FASLG
T_exhau	ID3
T_exhau	IDH2
T_exhau	IFI35
T_exhau	RBPJ
T_exhau	FASLG
T_exhau	NFATC1
T_exhau	PAM
T_exhau	SNX9
T_exhau	ACP5
T_exhau	SSH1
T_exhau	NFATC1
T_exhau	PAM
T_exhau	SNX9
T_exhau	ACP5
T_exhau	SSH1
T_exhau	NFATC1
T_exhau	PAM
T_exhau	SNX9
T_exhau	ACP5
T_exhau	SSH1
T_exhau	NFATC1
T_exhau	PAM
T_exhau	SNX9
T_exhau	ACP5
T_exhau	SSH1
T_exhau	CD27-AS1
T_exhau	BST2
T_exhau	WARS
T_exhau	ZNF79
T_exhau	ZBED2
T_exhau	TBL1XR1
T_exhau	ATHL1
T_exhau	TTYH3
T_exhau	CCND2
T_exhau	CD2
T_exhau	SYNGR2
T_exhau	CD4
T_exhau	CD7
T_exhau	UBE2L6
T_exhau	HNRNPLL
T_exhau	SYNGR2
T_exhau	CD4
T_exhau	CD7
T_exhau	UBE2L6
T_exhau	HNRNPLL
T_exhau	RAMP2-AS1
T_exhau	LOC100190986
T_exhau	AP4B1-AS1
T_exhau	MIR3917
T_exhau	LINC00963
T_exhau	RAMP2-AS1
T_exhau	LOC100190986
T_exhau	AP4B1-AS1
T_exhau	MIR3917
T_exhau	LINC00963
T_exhau	RAMP2-AS1
T_exhau	LOC100190986
T_exhau	AP4B1-AS1
T_exhau	MIR3917
T_exhau	LINC00963
T_exhau	CALCOCO2
T_exhau	SPRY2
T_exhau	CDK2AP2
T_exhau	CDKN1B
T_exhau	BET1
T_exhau	TRIM22
T_exhau	CD2BP2
T_exhau	MAD2L2
T_exhau	ARL6IP5
T_exhau	GNLY
T_exhau	DRAP1
T_exhau	DNPH1
T_exhau	MGEA5
T_exhau	NFAT5
T_exhau	RAI1
T_exhau	VAMP5
T_exhau	MTHFD2
T_exhau	FLN29
T_exhau	PAPOLA
T_exhau	PRDX3
T_exhau	BTG3
T_exhau	OS9
T_exhau	MAPRE2
T_exhau	NUDT5
T_exhau	PMF1
T_exhau	BTG3
T_exhau	OS9
T_exhau	MAPRE2
T_exhau	NUDT5
T_exhau	PMF1
T_exhau	BTG3
T_exhau	OS9
T_exhau	MAPRE2
T_exhau	NUDT5
T_exhau	PMF1
T_exhau	SETD9
T_exhau	STARD4
T_exhau	ADORA2A
T_exhau	HINT3
T_exhau	TRIM50
T_exhau	SETD9
T_exhau	STARD4
T_exhau	ADORA2A
T_exhau	HINT3
T_exhau	TRIM50
T_exhau	CTNNA1
T_exhau	CTSB
T_exhau	SGO2
T_exhau	BTLA
T_exhau	RDH10
T_exhau	NXNL2
T_exhau	FAM122C
T_exhau	CLECL1
T_exhau	IFNLR1
T_exhau	TTC24
T_exhau	NXNL2
T_exhau	FAM122C
T_exhau	CLECL1
T_exhau	IFNLR1
T_exhau	TTC24
T_exhau	ELF1
T_exhau	THAP8
T_exhau	APOBEC3A
T_exhau	APOBEC3F
T_exhau	ACSL4
T_exhau	SAMD9L
T_exhau	TLCD5
T_exhau	TPCN2
T_exhau	ALDOA
T_exhau	IKZF3
T_exhau	KLRK1
T_exhau	USP33
T_exhau	GGA2
T_exhau	MLC1
T_exhau	SEL1L3
T_exhau	ESYT1
T_exhau	SF3B3
T_exhau	MTREX
T_exhau	CADM1
T_exhau	GABARAPL1
T_exhau	ATP6V1C2
T_exhau	CNOT6L
T_exhau	FUT8
T_exhau	FYN
T_exhau	ZNF620
T_exhau	IFI6
T_exhau	GALNT2
T_exhau	GAPDH
T_exhau	PTPN22
T_exhau	SPAG8
T_exhau	GATA3
T_exhau	GBP1
T_exhau	GCNT1
T_exhau	HAVCR1
T_exhau	SIT1
T_exhau	GOLIM4
T_exhau	P2RY10
T_exhau	GMDS
T_exhau	GNAS
T_exhau	GPD2
T_exhau	BLOC1S2
T_exhau	LINC00294
T_exhau	GDPD1
T_exhau	GPR25
T_exhau	RNF149
T_exhau	CCDC141
T_exhau	LIN9
T_exhau	TBK1
T_exhau	CLEC2D
T_exhau	GTF2I
T_exhau	NRBP1
T_exhau	H3-3B
T_exhau	HLA-A
T_exhau	HLA-DPA1
T_exhau	HLA-DQB1
T_exhau	NRBP1
T_exhau	H3-3B
T_exhau	HLA-A
T_exhau	HLA-DPA1
T_exhau	HLA-DQB1
T_exhau	HMOX1
T_exhau	HNRNPC
T_exhau	HNRNPK
T_exhau	HSPA1A
T_exhau	HSPA1B
T_exhau	HSPB1
T_exhau	APLP2
T_exhau	ICAM3
T_exhau	IRF8
T_exhau	LINC00299
T_exhau	ID2
T_exhau	VSIG1
T_exhau	MTX3
T_exhau	BMP8A
T_exhau	IL2RB
T_exhau	ID2
T_exhau	VSIG1
T_exhau	MTX3
T_exhau	BMP8A
T_exhau	IL2RB
T_exhau	ITK
T_exhau	ITPKB
T_exhau	FAM73A
T_exhau	MALAT1
T_exhau	CD158B1
T_exhau	ITK
T_exhau	ITPKB
T_exhau	FAM73A
T_exhau	MALAT1
T_exhau	CD158B1
T_exhau	STMN1
T_exhau	LIMK1
T_exhau	RHOH
T_exhau	DTHD1
T_exhau	ARL3
T_exhau	IRAG2
T_exhau	LY6E
T_exhau	CAPRIN1
T_exhau	TBC1D3B
T_exhau	TBC1D3C
T_exhau	CCL3L3
T_exhau	GLUD1P7
T_exhau	SPDYE5
T_exhau	MTHFD1
T_exhau	MX1
T_exhau	MYO1E
T_exhau	MYO5B
T_exhau	NASP
T_exhau	NCF4
T_exhau	NEDD9
T_exhau	MYO1E
T_exhau	MYO5B
T_exhau	NASP
T_exhau	NCF4
T_exhau	NEDD9
T_exhau	TAS2R14
T_exhau	GLRX2
T_exhau	TXNDC11
T_exhau	SDF4
T_exhau	NUSAP1
T_exhau	PDE4D
T_exhau	LUC7L2
T_exhau	ASB2
T_exhau	RAPGEF6
T_exhau	ARID4B
T_exhau	PDE4D
T_exhau	LUC7L2
T_exhau	ASB2
T_exhau	RAPGEF6
T_exhau	ARID4B
T_exhau	PLSCR1
T_exhau	TRIM34
T_exhau	PON2
T_exhau	DDIT4
T_exhau	CXXC11
T_exhau	VSIG10
T_exhau	PARP14
T_exhau	KIAA1546
T_exhau	AHI1
T_exhau	PALMD
T_exhau	NSUN2
T_exhau	CASZ1
T_exhau	PPM1G
T_exhau	RNF31
T_exhau	C10ORF3
T_exhau	ASXL2
T_exhau	MIS18BP1
T_exhau	ASPDH
T_exhau	CHST12
T_exhau	PRF1
T_exhau	DDX60
T_exhau	PRKAR1A
T_exhau	RCC2
T_exhau	MAPK13
T_exhau	MAP2K3
T_exhau	TMEM234
T_exhau	B2M
T_exhau	PSMA5
T_exhau	PSMB3
T_exhau	LXN
T_exhau	PSMB9
T_exhau	PSMC3
T_exhau	PSMD4
T_exhau	PSMD8
T_exhau	PHTF2
T_exhau	PELI1
T_exhau	ATP10D
T_exhau	PSME2
T_exhau	PTGIS
T_exhau	RHBDD2
T_exhau	C3ORF14
T_exhau	STRIP2
T_exhau	ODF2L
T_exhau	AARS2
T_exhau	KIAA1324
T_exhau	PTMS
T_exhau	SFMBT2
T_exhau	PTPN11
T_exhau	LSM2
T_exhau	SLAMF7
T_exhau	SLC4A5
T_exhau	PTPRC
T_exhau	PTPRCAP
T_exhau	LY6G5B
T_exhau	RALGDS
T_exhau	RANBP1
T_exhau	RFX5
T_exhau	RGS4
T_exhau	ACTB
T_exhau	APOBEC3G
T_exhau	ROCK1
T_exhau	RSC1A1
T_exhau	SALL2
T_exhau	GOLPH3
T_exhau	SMG1P1
T_exhau	NCAPG
T_exhau	MS4A6A
T_exhau	SRSF1
T_exhau	SRSF4
T_exhau	ARHGAP9
T_exhau	ZDHHC6
T_exhau	TNS3
T_exhau	PLEKHG2
T_exhau	SNRPB
T_exhau	SPTAN1
T_exhau	SRI
T_exhau	ZFP36L1
T_exhau	TAP1
T_exhau	TBXA2R
T_exhau	TMBIM6
T_exhau	TFRC
T_exhau	ACTG1
T_exhau	TNFAIP3
T_exhau	TRPS1
T_exhau	TTN
T_exhau	TFRC
T_exhau	ACTG1
T_exhau	TNFAIP3
T_exhau	TRPS1
T_exhau	TTN
T_exhau	TFRC
T_exhau	ACTG1
T_exhau	TNFAIP3
T_exhau	TRPS1
T_exhau	TTN
T_exhau	MAPKAPK3
T_exhau	CYBC1
T_exhau	SEM1
T_exhau	RIN3
T_exhau	ATP8B4
T_exhau	TNIP3
T_exhau	DENND2D
T_exhau	SCD5
T_exhau	FBXL18
T_exhau	PIF1
T_exhau	TNIP3
T_exhau	DENND2D
T_exhau	SCD5
T_exhau	FBXL18
T_exhau	PIF1
T_exhau	ACTN4
T_exhau	GPR63
T_exhau	VMP1
T_exhau	DOCK8
T_exhau	ARPC5L
T_exhau	NCOA3
T_exhau	CAPZA2
T_exhau	KLRC4
T_exhau	HIST1H2BM
T_exhau	RASSF5
T_exhau	LY6A
T_exhau	H4C3
T_exhau	SH3BGRL2
T_exhau	IFI27L2
T_exhau	ARID5B
T_exhau	MEX3B
T_exhau	PCGF5
T_exhau	AFAP1L2
T_exhau	FKSG79
T_exhau	FKBP6
T_exhau	CAT
T_exhau	UBASH3B
T_exhau	CAMK1
T_exhau	STRA13
T_exhau	YARS
T_exhau	CAT
T_exhau	UBASH3B
T_exhau	CAMK1
T_exhau	STRA13
T_exhau	YARS
T_exhau	INPP4B
T_exhau	CD84
T_exhau	PER3
T_exhau	PER2
T_exhau	SH2D2A
T_exhau	AIP
T_exhau	PSTPIP1
T_exhau	CCDC74A
T_exhau	FCGR2C
T_exhau	CD3D
T_exhau	PCED1B
T_exhau	FIBP
T_exhau	CD3G
T_exhau	ZMYM5
T_exhau	FCMR
T_exhau	PTTG1
T_exhau	PDLIM7
T_exhau	ADGRG1
T_exhau	COX5A
T_exhau	RECQL4
T_exhau	TMPRSS11D
T_exhau	EPSTI1
T_exhau	TP53INP1
T_exhau	CHST2
T_exhau	GSTO1
T_exhau	ATG5
T_exhau	LITAF
T_exhau	KIF20B
T_exhau	ABCG1
T_exhau	ISG15
T_exhau	HS2ST1
T_exhau	EDEM1
T_exhau	CD74
T_exhau	CLSTN3
T_exhau	KIAA0247
T_exhau	MATR3
T_exhau	SNX17
T_exhau	LRIG2
T_exhau	SRGAP3
T_exhau	DCLRE1A
T_exhau	SCO2
T_exhau	AP001885.1
T_exhau	LOC100271836
T_exhau	LOC286186
T_exhau	LOC440354
T_exhau	LOC728558
T_cytoto	CD8A
T_cytoto	CD8B
T_cytoto	CD3D
T_cytoto	CD3E
T_cytoto	CD2
T_cytoto	NKG7
T_cytoto	TRAC
T_cytoto	CCL5
T_cytoto	CST7
T_cytoto	CD4
T_cytoto	GZMA
T_cytoto	PRF1
T_cytoto	GZMH
T_cytoto	EOMES
T_cytoto	CRTAM
T_cytoto	CD69
T_cytoto	PTPRC
T_cytoto	GZMB
T_cytoto	CD3G
T_cytoto	IFNGAMMA
T_cytoto	CTSW
T_cytoto	KLRD1
T_cytoto	KLRB1
T_cytoto	RORA
T_cytoto	RUNX3
T_cytoto	DUSP2
T_cytoto	SIGIRR
T_cytoto	WHAMMP3
T_cytoto	ITGAM
T_cytoto	CCL4
T_cytoto	CD200
T_cytoto	CD7
T_cytoto	CD28
T_cytoto	CD27
T_cytoto	CD5
T_cytoto	LTA
T_cytoto	GZMK
T_cytoto	GNLY
T_cytoto	KLRK1
T_cytoto	KLRG1
T_cytoto	APBA2
T_cytoto	KLRF1
T_cytoto	ZBTB16
T_cytoto	APOL3
T_cytoto	CCL3
T_cytoto	IL2
T_cytoto	CD38
T_cytoto	APOE
T_cytoto	SELP28
T_cytoto	IL-7R
T_cytoto	TNF
T_cytoto	SELL
T_eff	CD28
T_eff	CD182
T_eff	IL-7R
T_eff	KLRG1
T_eff	IL2RB
T_eff	CD3D
T_eff	CD3E
T_eff	CD3G
T_eff	PTPRC
T_eff	CRR7
T_eff	SELL
T_eff	CXCR4
T_eff	FGFBP2
T_eff	CD27
T_eff	GNLY
T_eff	CCR5
T_eff	CX3CR1
T_eff	FCG3RA
T_eff	GZMH
T_eff	TBX21
T_eff	ITGAL
T_eff	S1PR1
T_eff	KLRK1
T_eff	ZNF683
T_eff	B3GAT1
T_eff	GZMA
T_eff	GZMB
T_eff	GZMK
T_eff	FAS
T_eff	IL18
T_eff	CD158B1
T_eff	KIR3DL2
T_eff	KLRD1
T_eff	KLRF1
T_eff	2B4
T_eff	EOMES
T_eff	CD4
T_eff	CD8A
T_eff	NCR1
T_eff-memory	IL-7R
T_eff-memory	PTPRC
T_eff-memory	CD28
T_eff-memory	FAS
T_eff-memory	CD27
T_eff-memory	CRR7
T_eff-memory	CD182
T_eff-memory	ITGAL
T_eff-memory	SELL
T_eff-memory	KLRG1
T_eff-memory	PTGDR2
T_eff-memory	CCR4
T_eff-memory	CCR6
T_eff-memory	B3GAT1
T_eff-memory	GZMK
T_eff-memory	IL2RB
T_eff-memory	CCL4
T_eff-memory	CXCR4
T_eff-memory	CD3D
T_eff-memory	CD4
T_eff-memory	AKT3
T_eff-memory	MFT2
T_eff-memory	DDX17
T_eff-memory	CCR5
T_eff-memory	CX3CR1
T_eff-memory	CYLD
T_eff-memory	GRP183
T_eff-memory	EWSR1
T_eff-memory	FLI1
T_eff-memory	C7ORF54
T_eff-memory	IL2RA
T_eff-memory	IL18
T_eff-memory	ISG20
T_eff-memory	KLRB1
T_eff-memory	LTK
T_eff-memory	MEFV
T_eff-memory	NFATC4
T_eff-memory	NKG7
T_eff-memory	PRKY
T_eff-memory	CCL5
T_eff-memory	TNMD
T_eff-memory	TBCD
T_eff-memory	TCRA
T_eff-memory	CC-CKR-2
T_eff-memory	EZR
T_eff-memory	GDPD5
T_eff-memory	CD3E
T_eff-memory	CD3G
T_eff-memory	CD8A
T_eff-memory	TBC1D5
Treg signature genes
Treg_exhau	CLTA4
Treg_exhau	TIGIT
Treg_exhau	ICOS
Treg_exhau	LAG3
Treg_exhau	FOXP3
Treg_exhau	PDCD1
Treg_exhau	TNFRSF4
Treg_exhau	HAVCR2
Treg_exhau	TNFRSF18
Treg_exhau	CD4
Treg_cytoto	CD8A
Treg_cytoto	CD8B
Treg_cytoto	CD3D
Treg_cytoto	CD3E
Treg_cytoto	CD2
Treg_cytoto	NKG7
Treg_cytoto	TRAC
Treg_cytoto	CCL5
Treg_cytoto	CST7
Treg_cytoto	CD4
Treg_cytoto	GZMA
Treg_cytoto	PRF1
Treg_cytoto	GZMH
Treg_cytoto	EOMES
Treg_cytoto	CRTAM
Treg_cytoto	CD69
Treg_cytoto	PTPRC
Treg_cytoto	GZMB
Treg_cytoto	CD3G
Treg_cytoto	IFNGAMMA
Treg_cytoto	CTSW
Treg_cytoto	KLRD1
Treg_cytoto	KLRB1
Treg_cytoto	RORA
Treg_cytoto	RUNX3
Treg_cytoto	DUSP2
Treg_cytoto	SIGIRR
Treg_cytoto	WHAMMP3
Treg_cytoto	ITGAM
Treg_cytoto	CCL4
Treg_cytoto	CD200
Treg_cytoto	CD7
Treg_cytoto	CD28
Treg_cytoto	CD27
Treg_cytoto	CD5
Treg_cytoto	LTA
Treg_cytoto	GZMK
Treg_cytoto	GNLY
Treg_cytoto	KLRK1
Treg_cytoto	KLRG1
Treg_cytoto	APBA2
Treg_cytoto	KLRF1
Treg_cytoto	ZBTB16
Treg_cytoto	APOL3
Treg_cytoto	CCL3
Treg_cytoto	IL2
Treg_cytoto	CD38
Treg_cytoto	APOE
Treg_cytoto	SELP28
Treg_cytoto	IL-7R
Treg_cytoto	TNF
Treg_cytoto	SELL
Treg_eff-positive	CD28
Treg_eff-positive	CD182
Treg_eff-positive	IL-7R
Treg_eff-positive	KLRG1
Treg_eff-positive	IL2RB
Treg_eff-positive	CD3D
Treg_eff-positive	CD3E
Treg_eff-positive	CD3G
Treg_eff-positive	PTPRC
Treg_eff-positive	CRR7
Treg_eff-positive	SELL
Treg_eff-positive	CXCR4
Treg_eff-positive	FGFBP2
Treg_eff-positive	CD27
Treg_eff-positive	GNLY
Treg_eff-positive	CCR5
Treg_eff-positive	CX3CR1
Treg_eff-positive	FCG3RA
Treg_eff-positive	GZMH
Treg_eff-positive	TBX21
Treg_eff-positive	ITGAL
Treg_eff-positive	S1PR1
Treg_eff-positive	KLRK1
Treg_eff-positive	ZNF683
Treg_eff-positive	B3GAT1
Treg_eff-positive	GZMA
Treg_eff-positive	GZMB
Treg_eff-positive	GZMK
Treg_eff-positive	FAS
Treg_eff-positive	IL18
Treg_eff-positive	CD158B1
Treg_eff-positive	KIR3DL2
Treg_eff-positive	KLRD1
Treg_eff-positive	KLRF1
Treg_eff-positive	2B4
Treg_eff-positive	EOMES
Treg_eff-positive	CD4
Treg_eff-positive	CD8A
Treg_eff-positive	NCR1
Treg_eff-memory	IL-7R
Treg_eff-memory	PTPRC
Treg_eff-memory	CD28
Treg_eff-memory	FAS
Treg_eff-memory	CD27
Treg_eff-memory	CRR7
Treg_eff-memory	CD182
Treg_eff-memory	ITGAL
Treg_eff-memory	SELL
Treg_eff-memory	KLRG1
Treg_eff-memory	PTGDR2
Treg_eff-memory	CCR4
Treg_eff-memory	CCR6
Treg_eff-memory	B3GAT1
Treg_eff-memory	GZMK
Treg_eff-memory	IL2RB
Treg_eff-memory	CCL4
Treg_eff-memory	CXCR4
Treg_eff-memory	CD3D
Treg_eff-memory	CD4
Treg_eff-memory	AKT3
Treg_eff-memory	MFT2
Treg_eff-memory	DDX17
Treg_eff-memory	CCR5
Treg_eff-memory	CX3CR1
Treg_eff-memory	CYLD
Treg_eff-memory	GRP183
Treg_eff-memory	EWSR1
Treg_eff-memory	FLI1
Treg_eff-memory	C7ORF54
Treg_eff-memory	IL2RA
Treg_eff-memory	IL18
Treg_eff-memory	ISG20
Treg_eff-memory	KLRB1
Treg_eff-memory	LTK
Treg_eff-memory	MEFV
Treg_eff-memory	NFATC4
Treg_eff-memory	NKG7
Treg_eff-memory	PRKY
Treg_eff-memory	CCL5
Treg_eff-memory	TNMD
Treg_eff-memory	TBCD
Treg_eff-memory	TCRA
Treg_eff-memory	CC-CKR-2
Treg_eff-memory	EZR
Treg_eff-memory	GDPD5
Treg_eff-memory	CD3E
Treg_eff-memory	CD3G
Treg_eff-memory	CD8A
Treg_eff-memory	TBC1D5
