# Supplementary figures and images for: The Disulfidptosis-Mediated Intercellular Communication in the Tumor Microenvironment Contributes to the Progression of Osteosarcoma and Immunotherapy
Source: Preprints.org preprint supplement (doi:10.20944/preprints202306.1915.v1), 2023-06-27

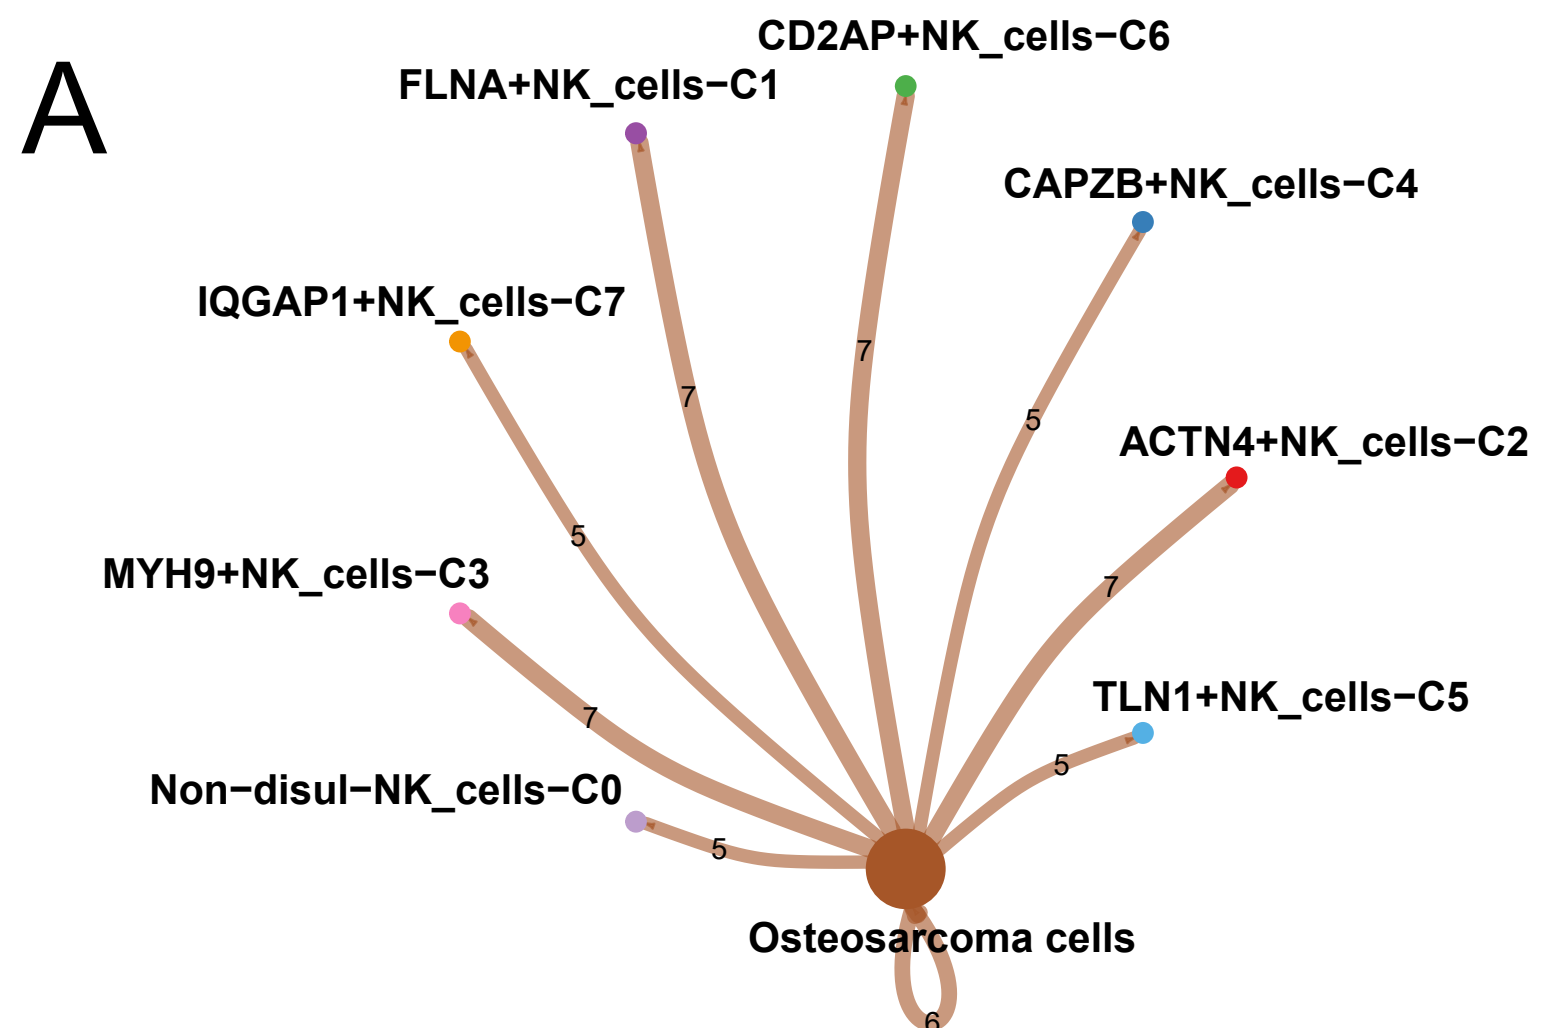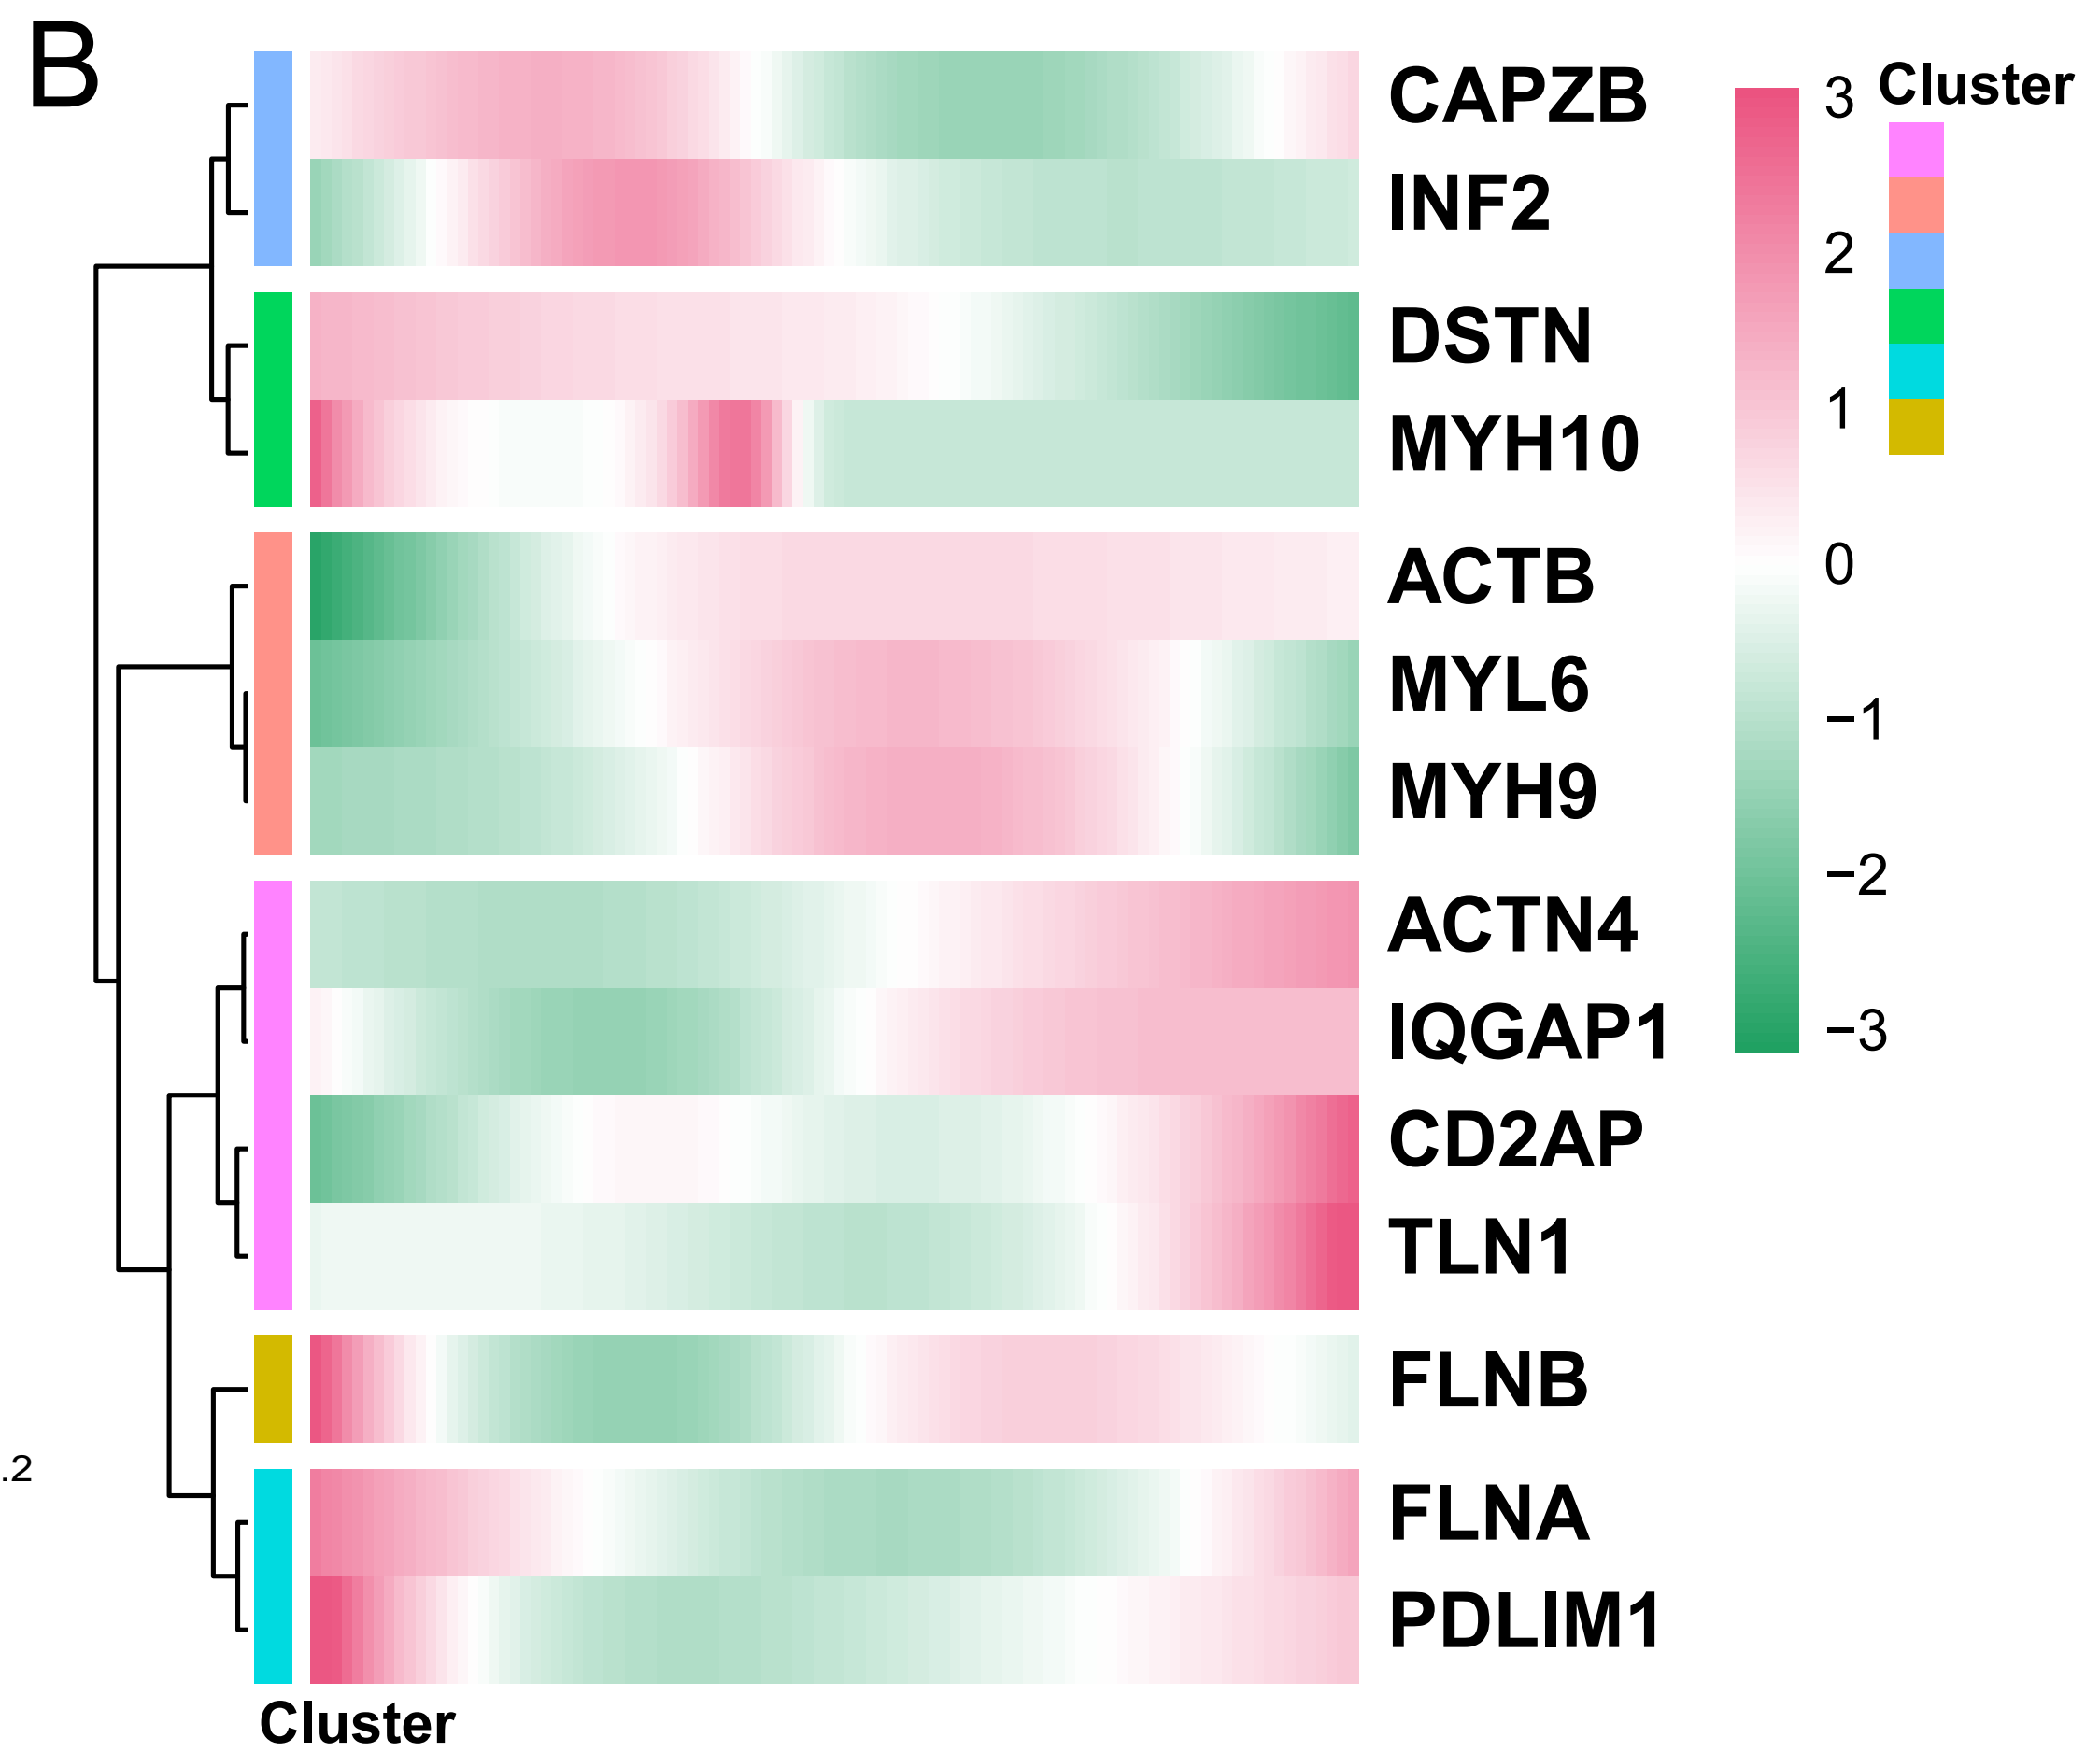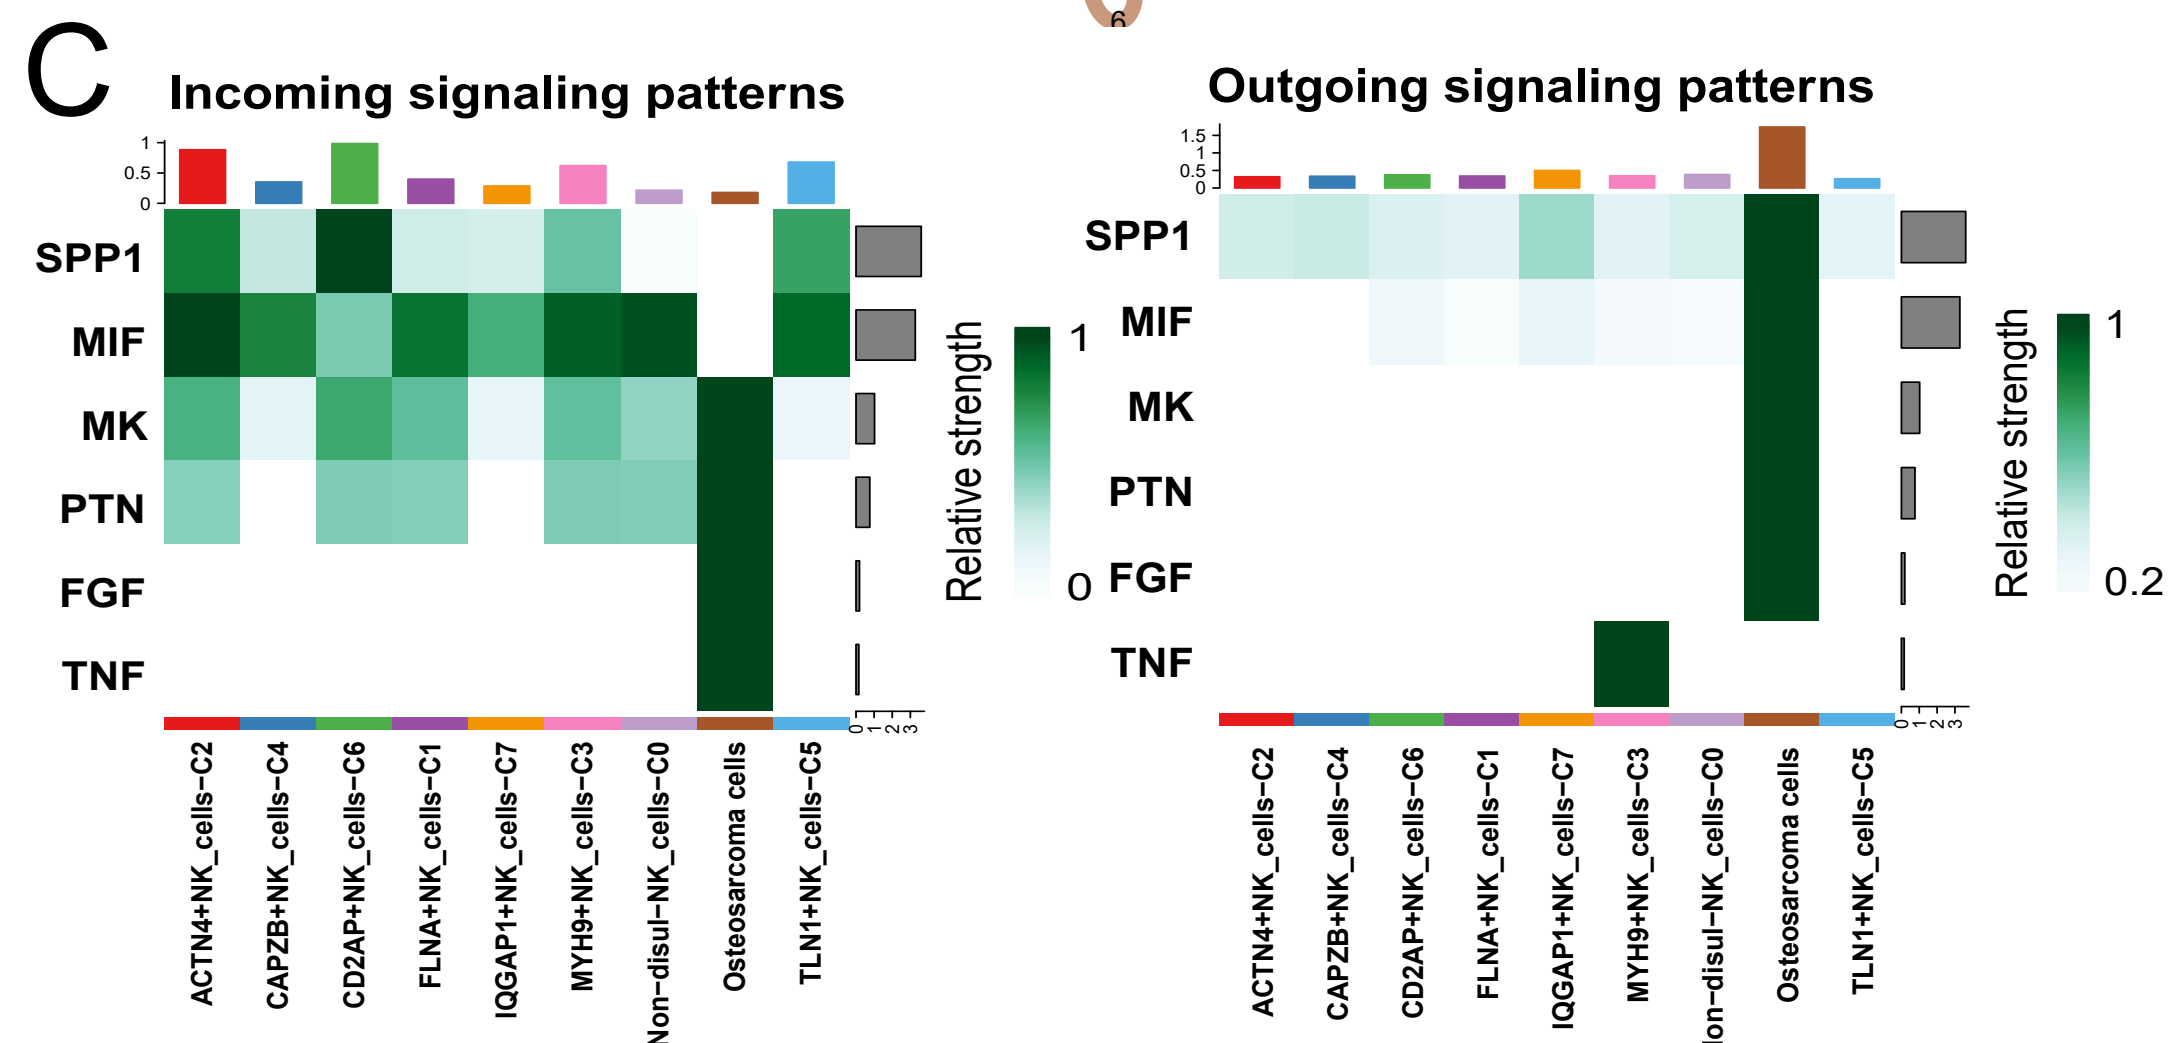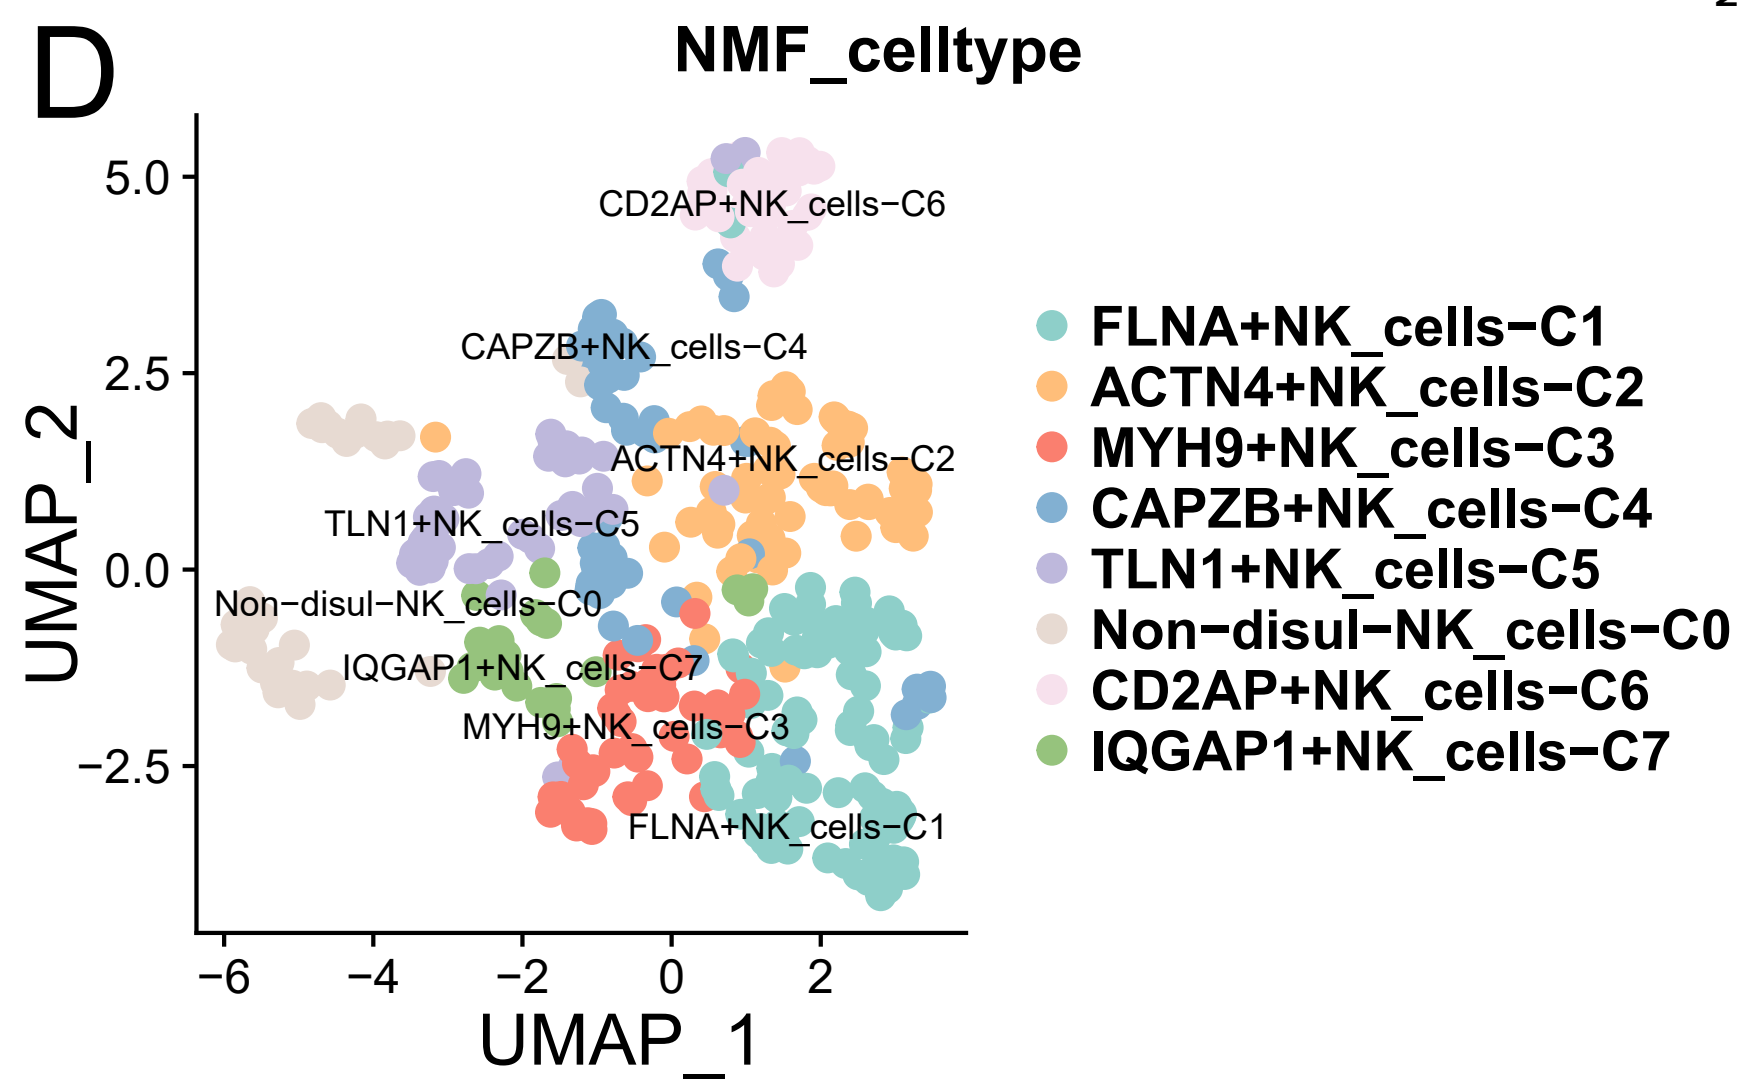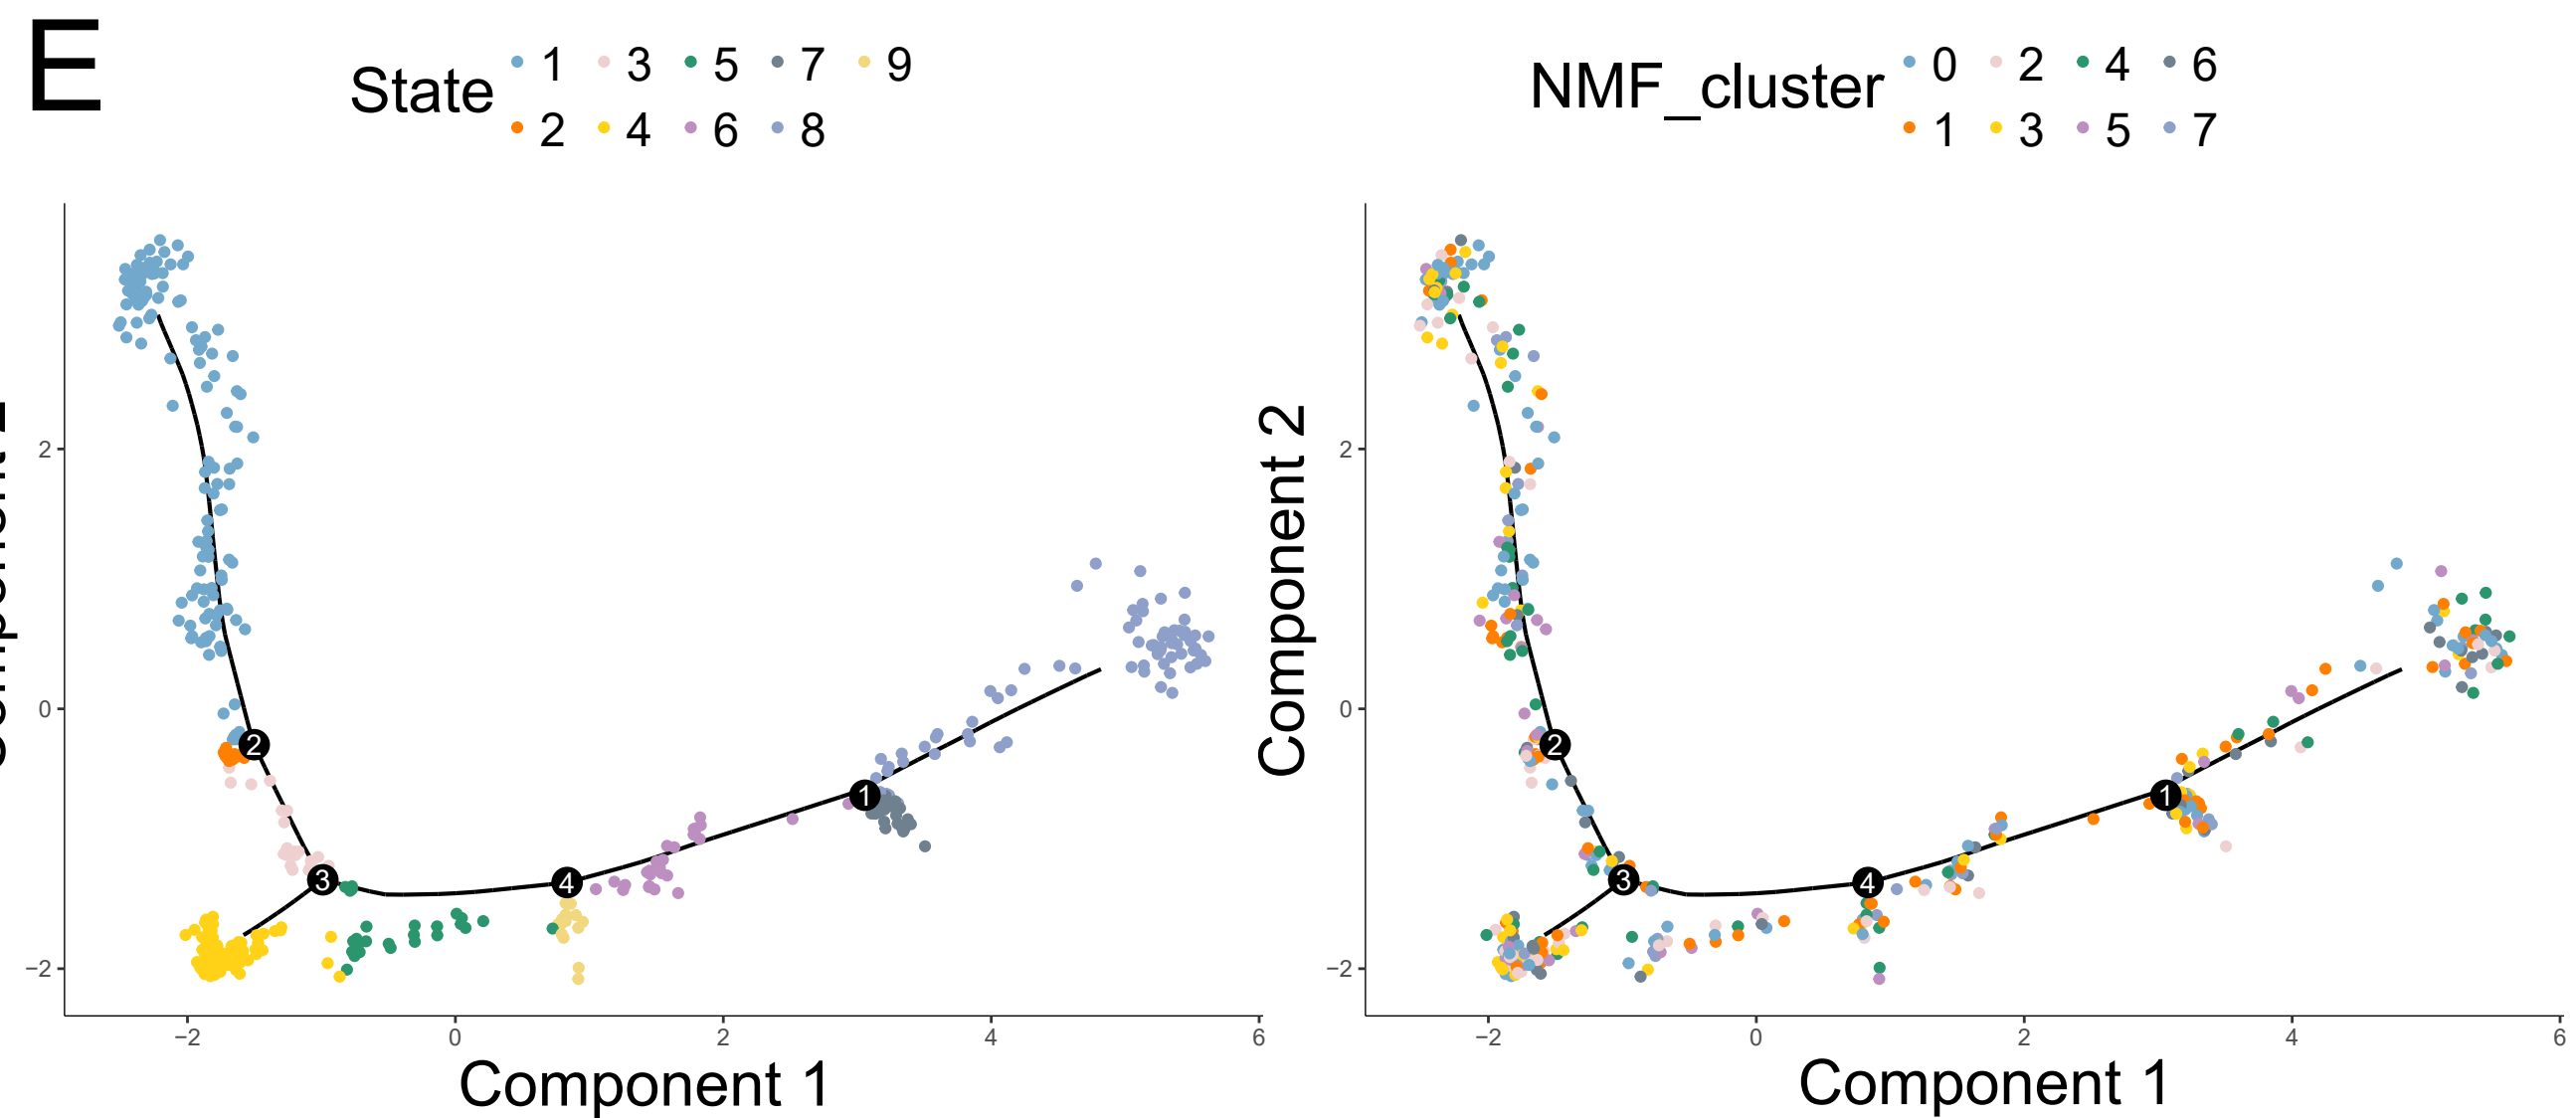

Supplement: Supplementary file 1 [file supplementary]

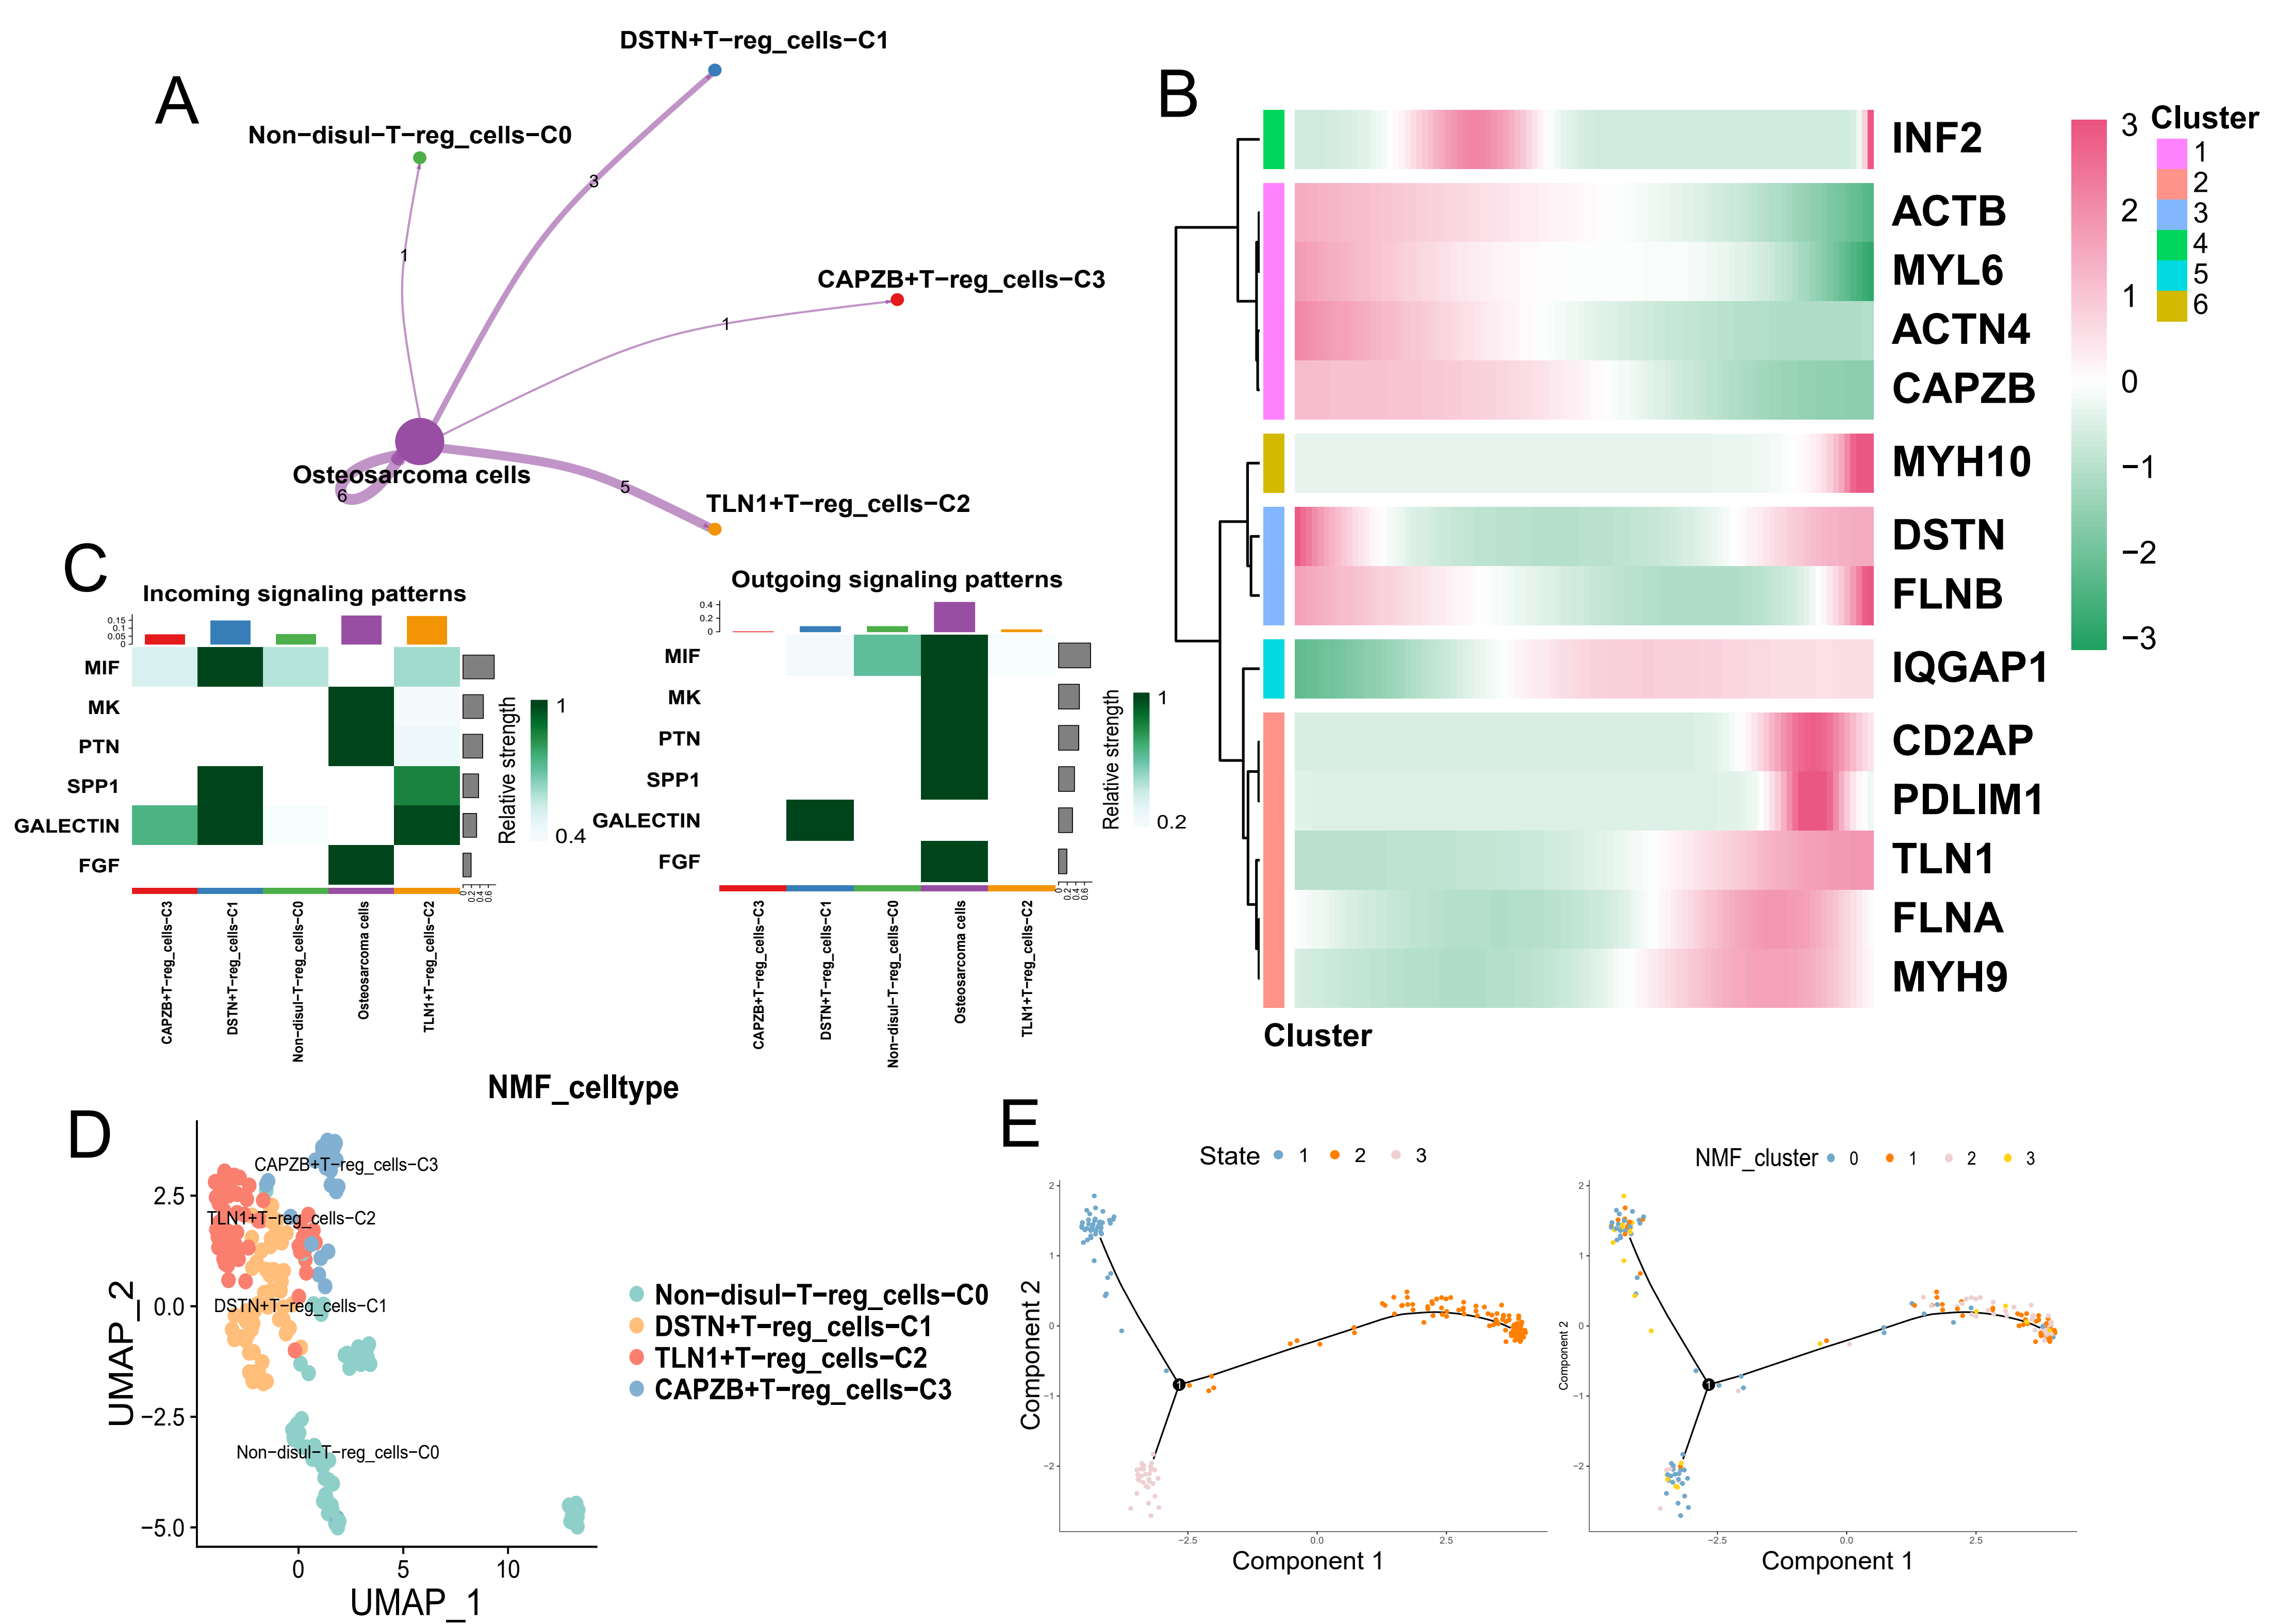

Supplement: Supplementary file 3 [file supplementary]

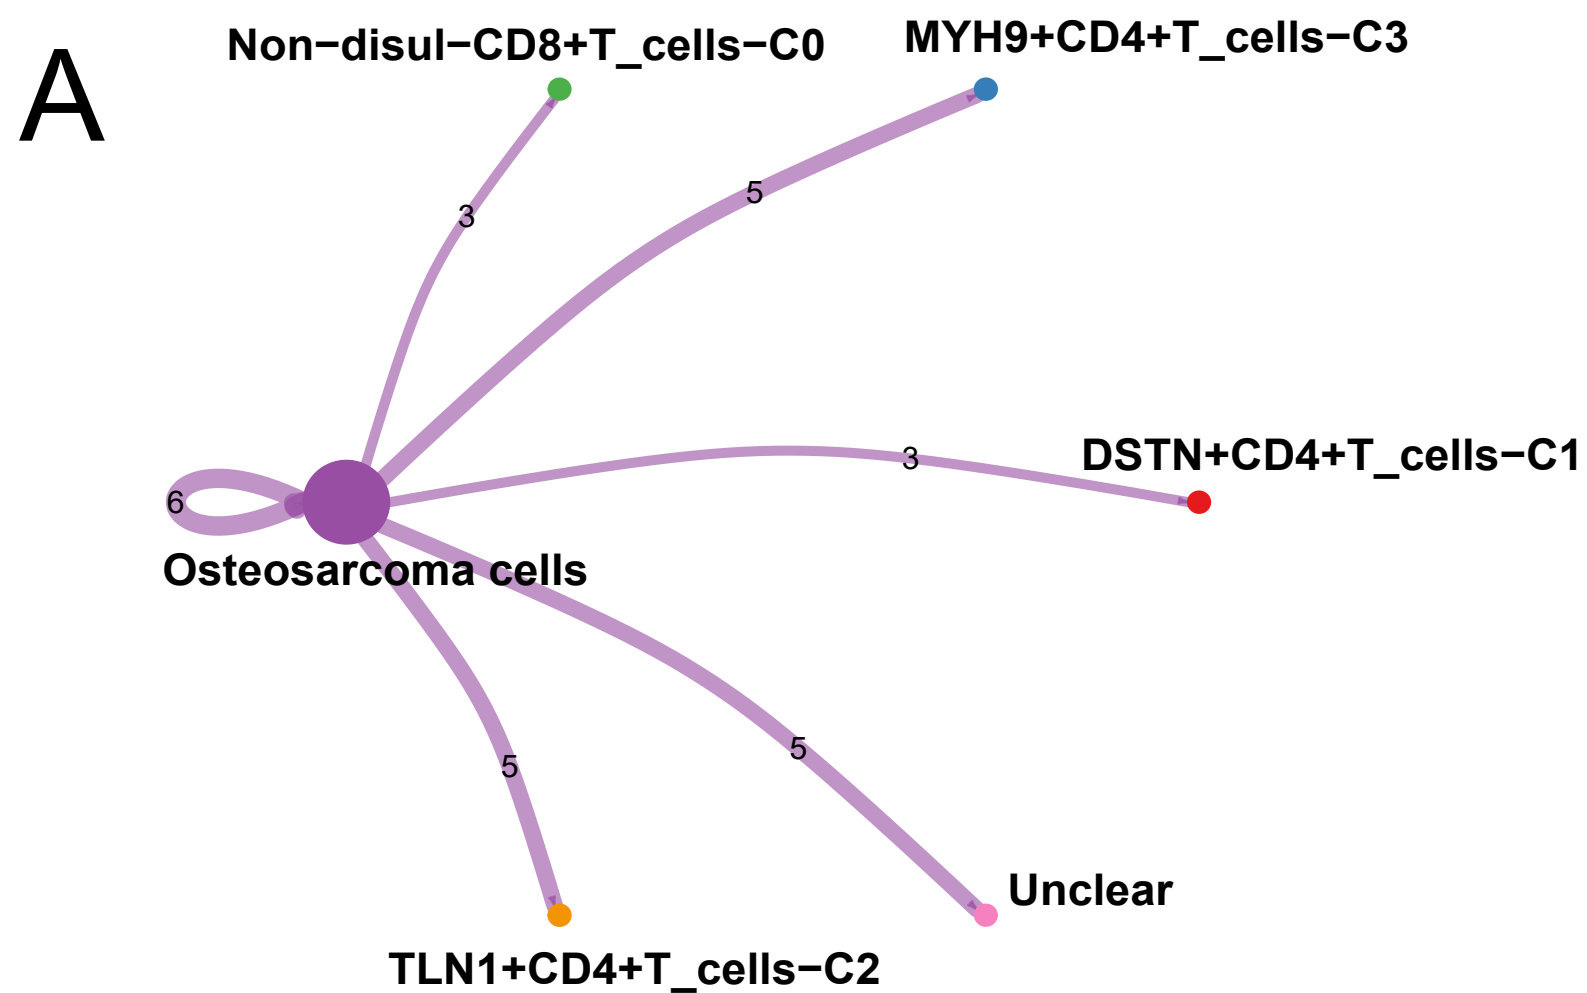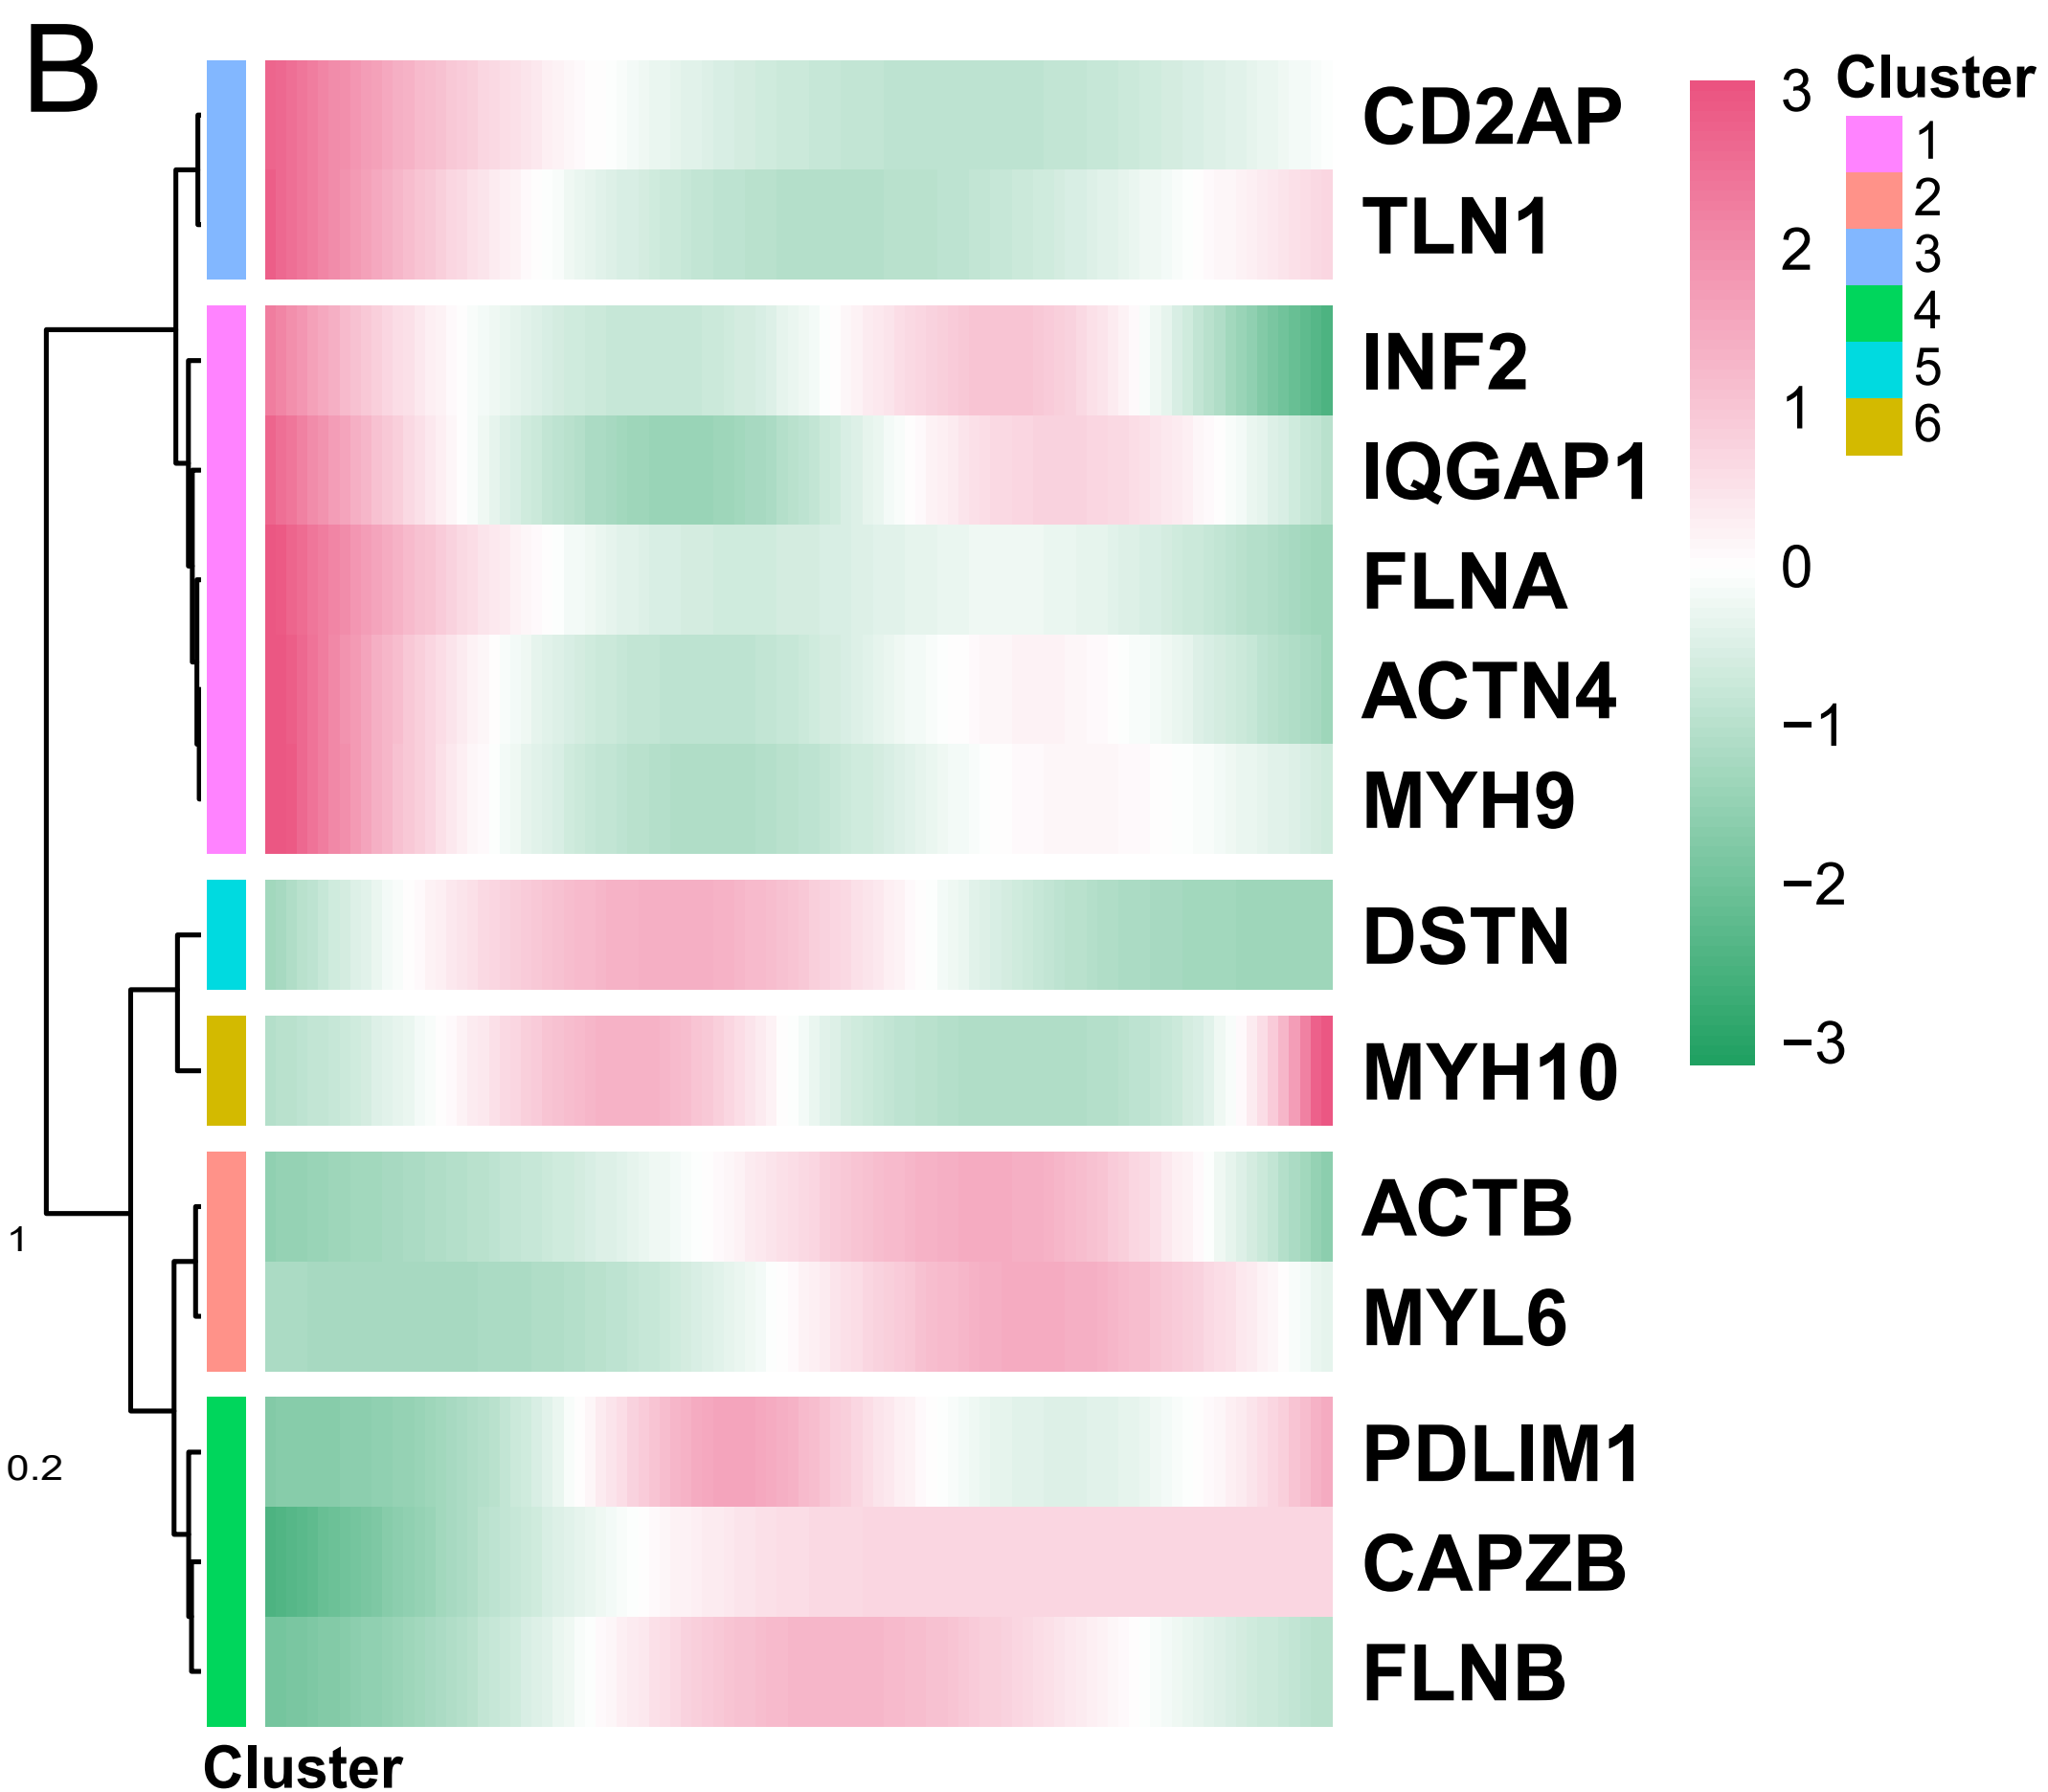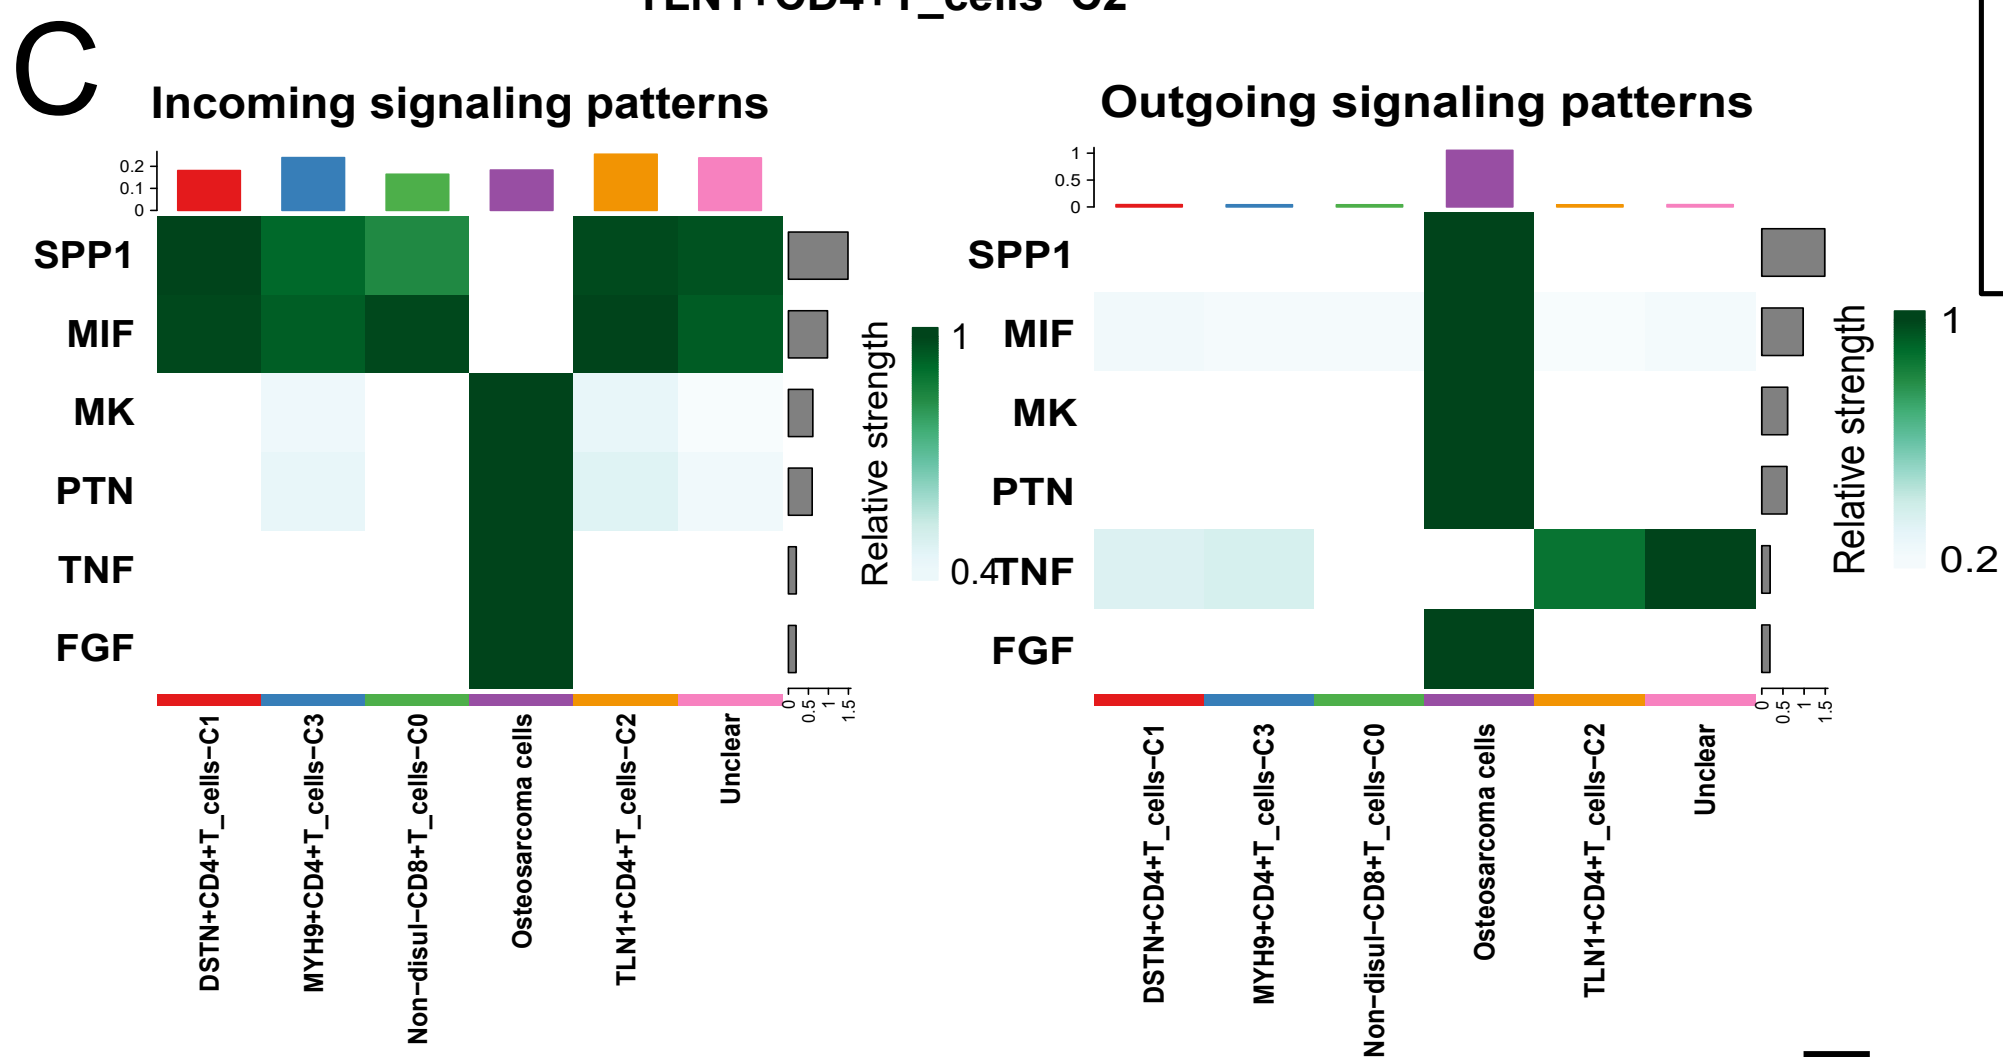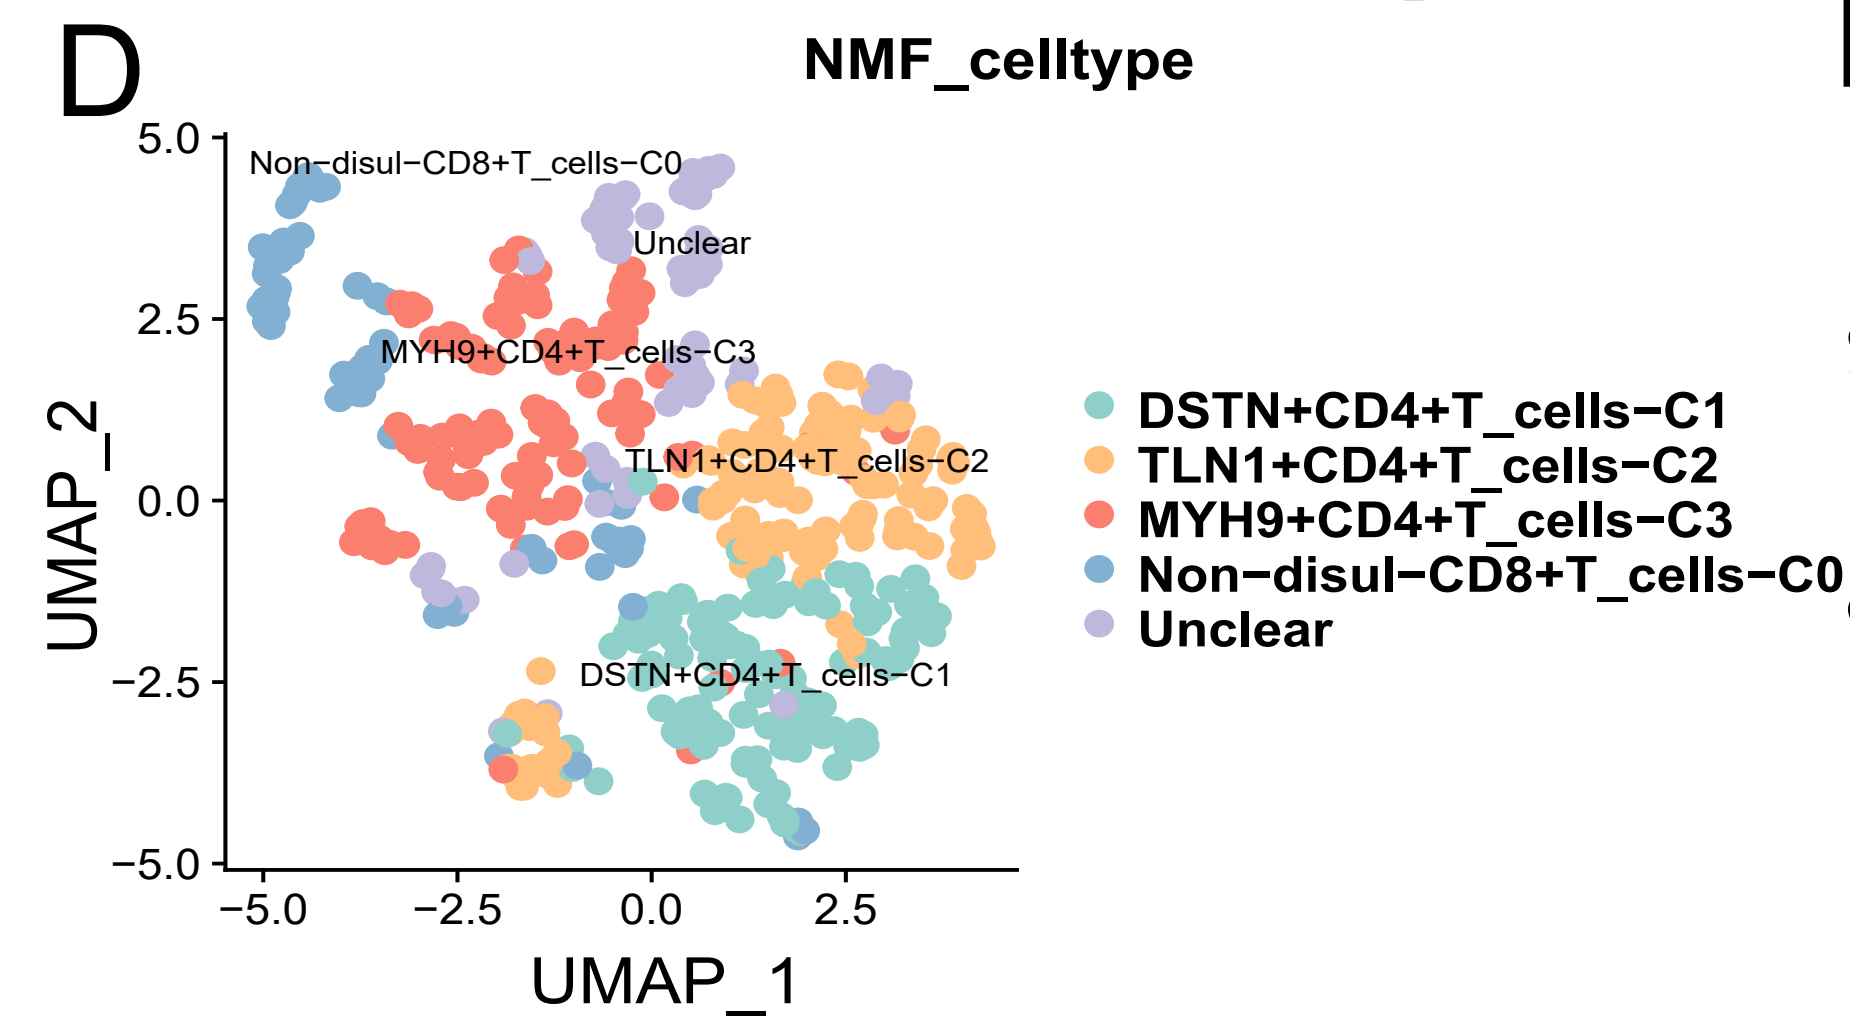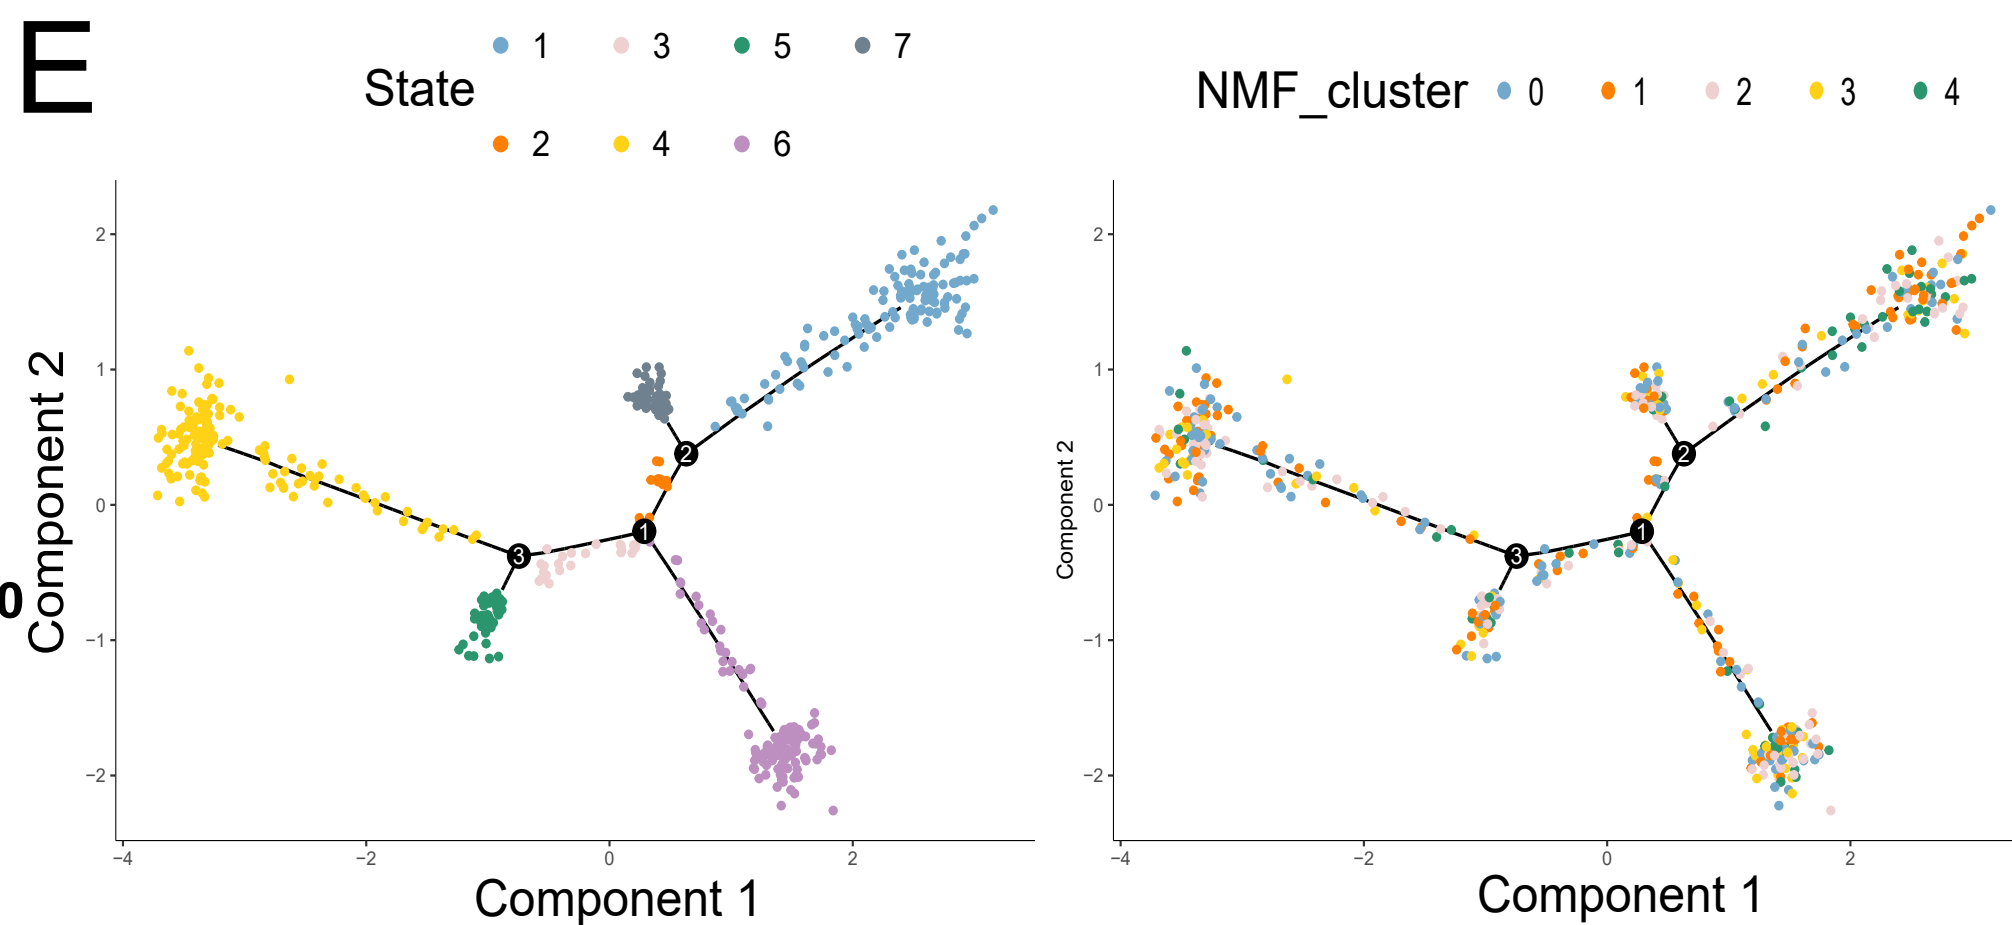

Supplement: Supplementary file 4 [file supplementary]

A

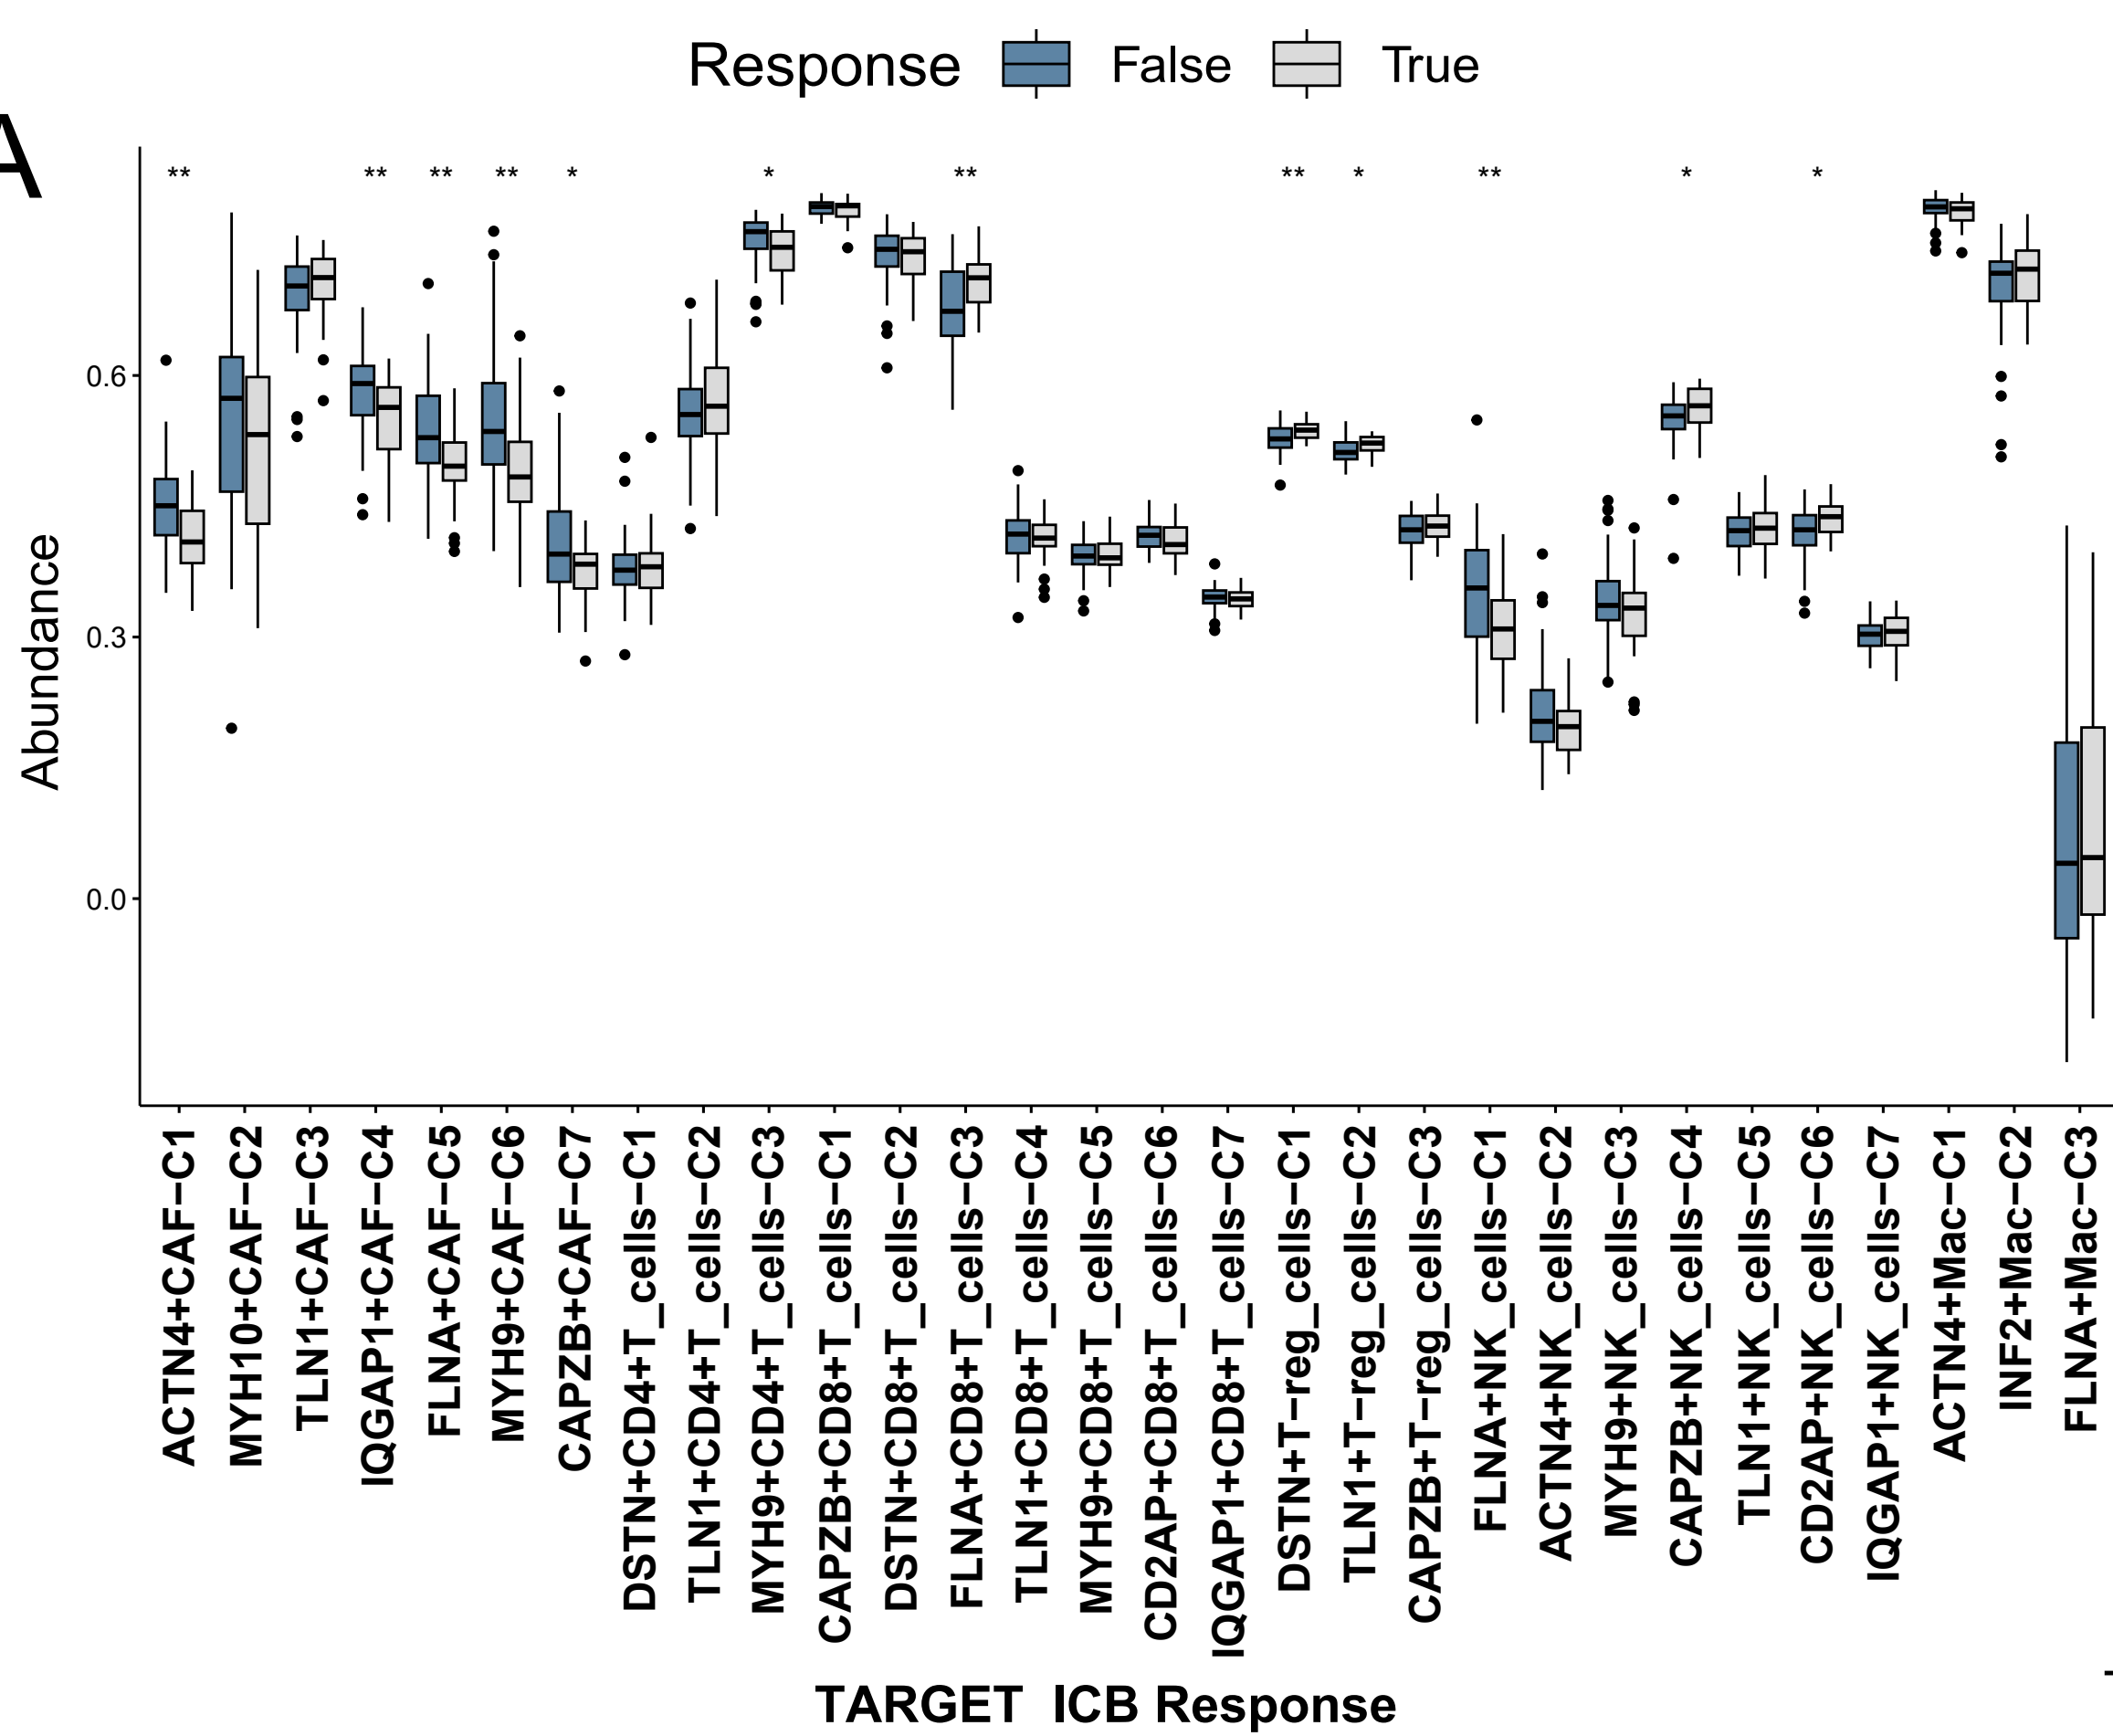

B

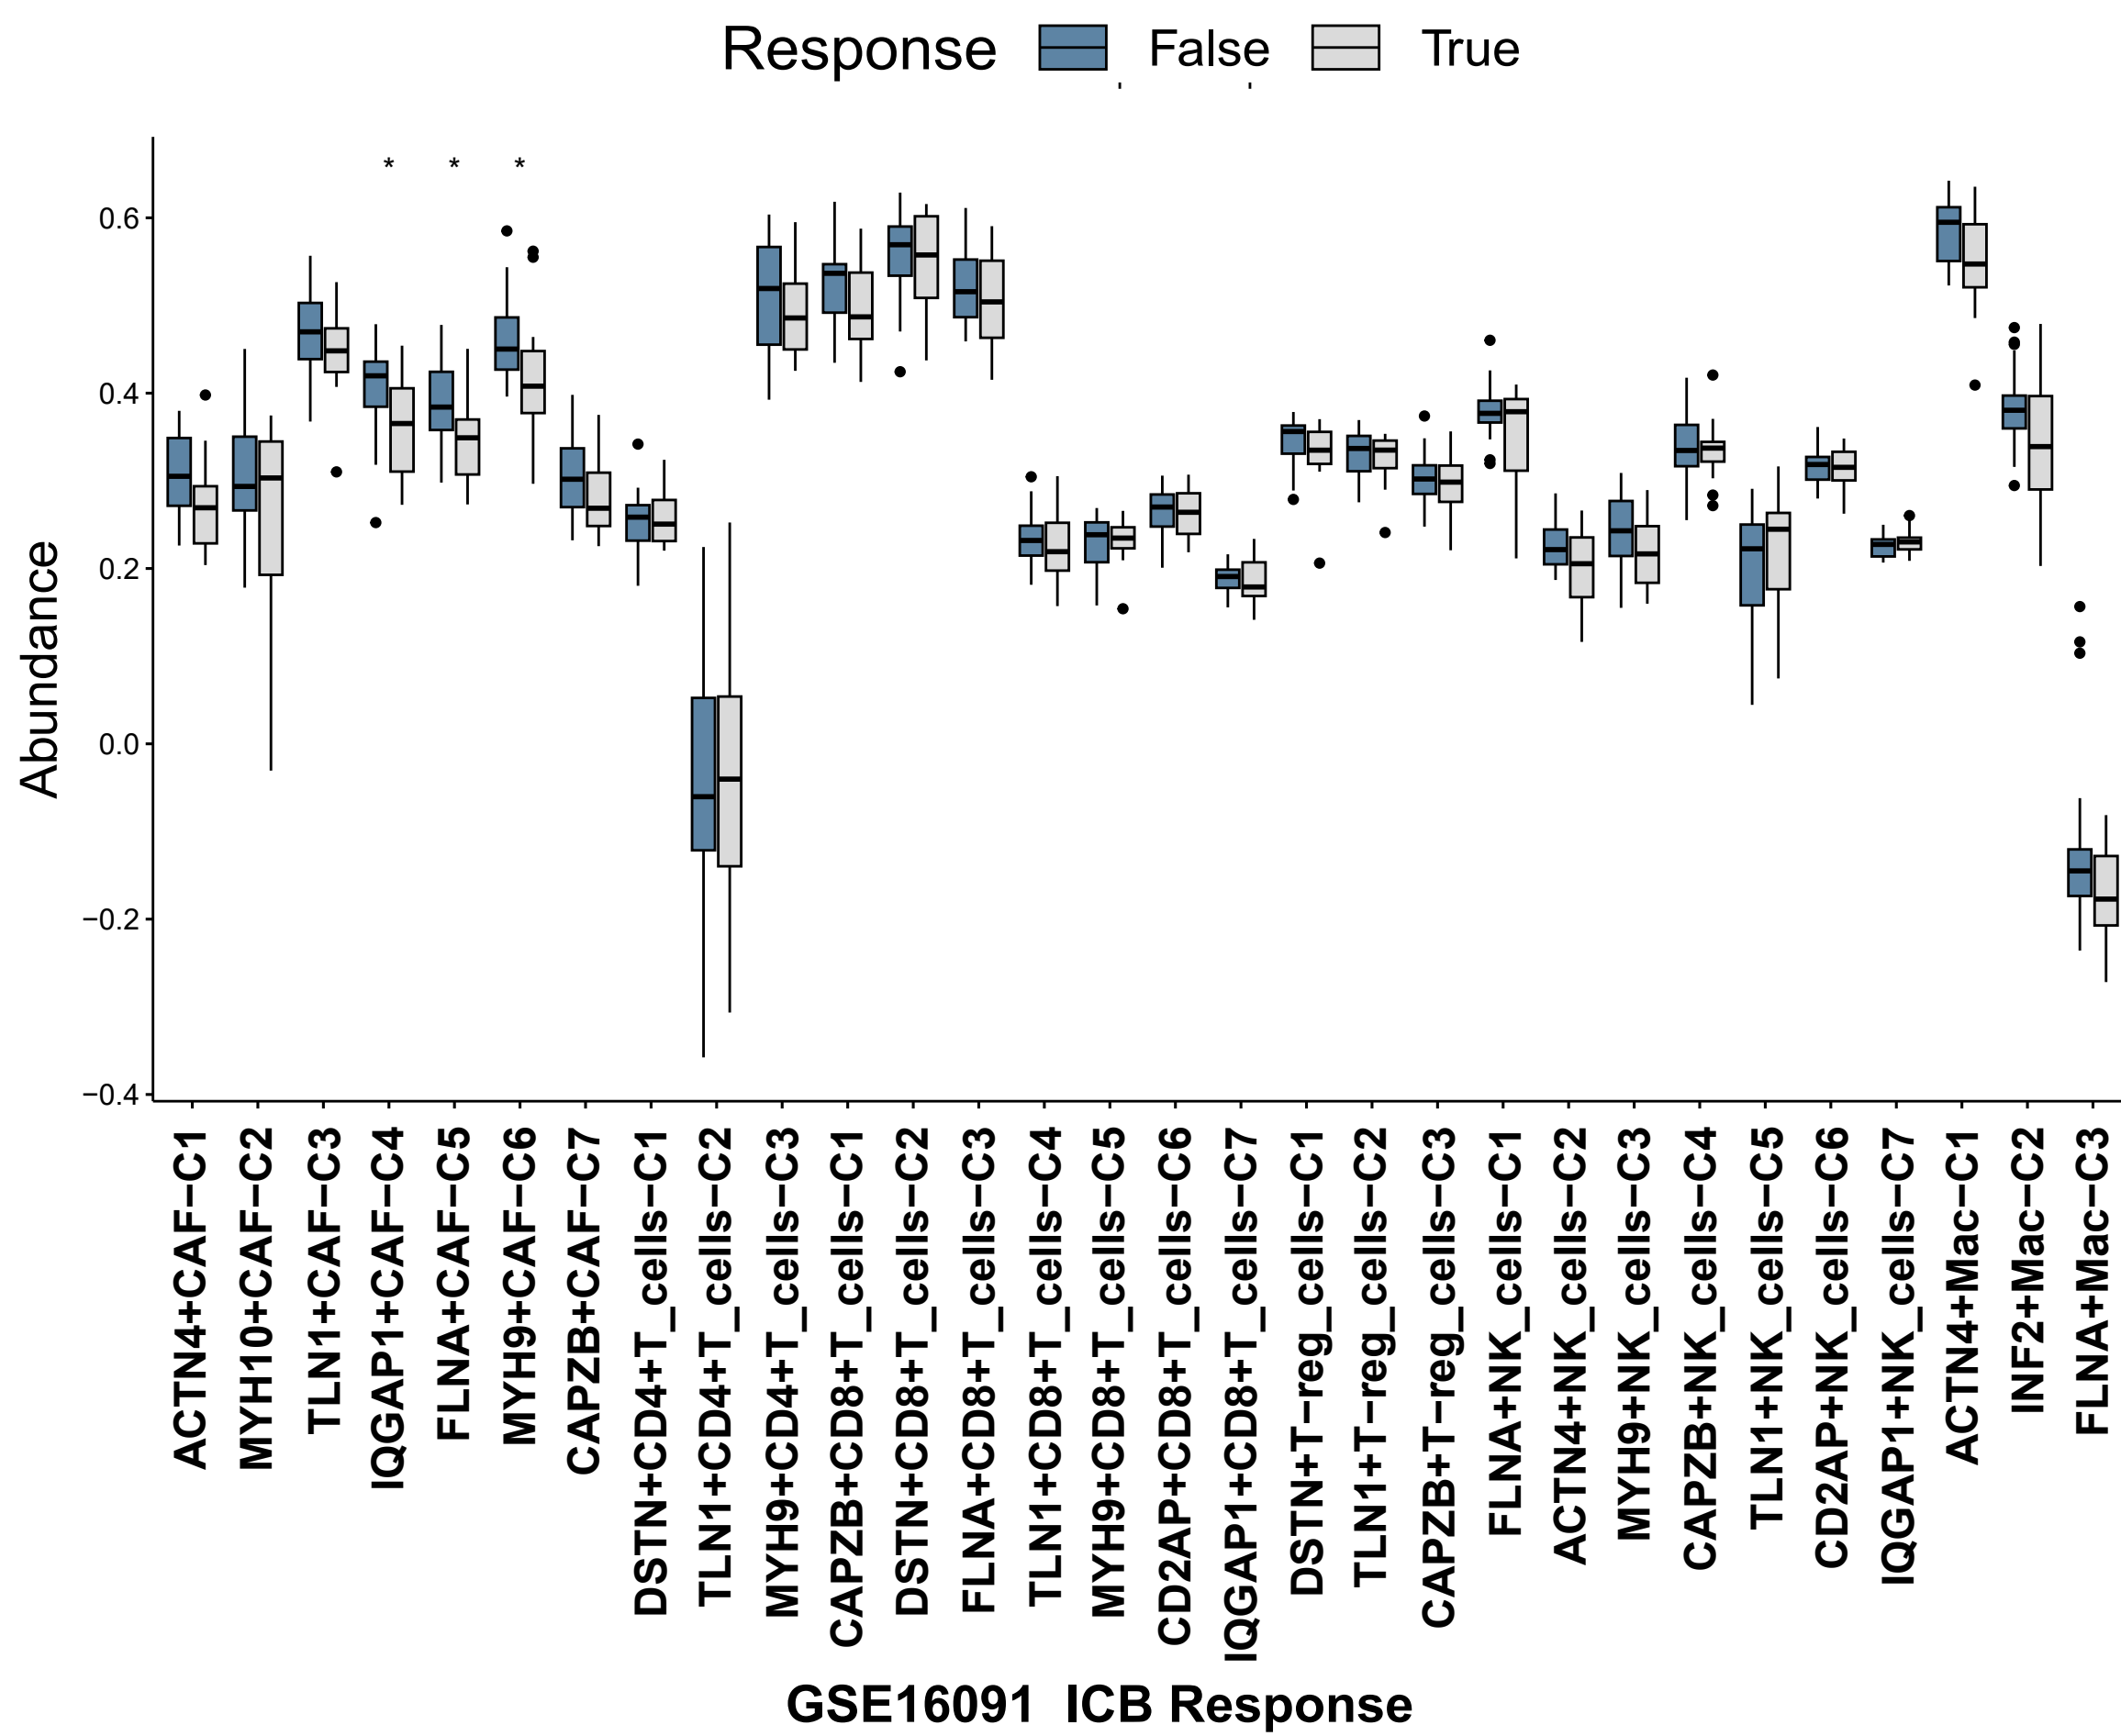

C

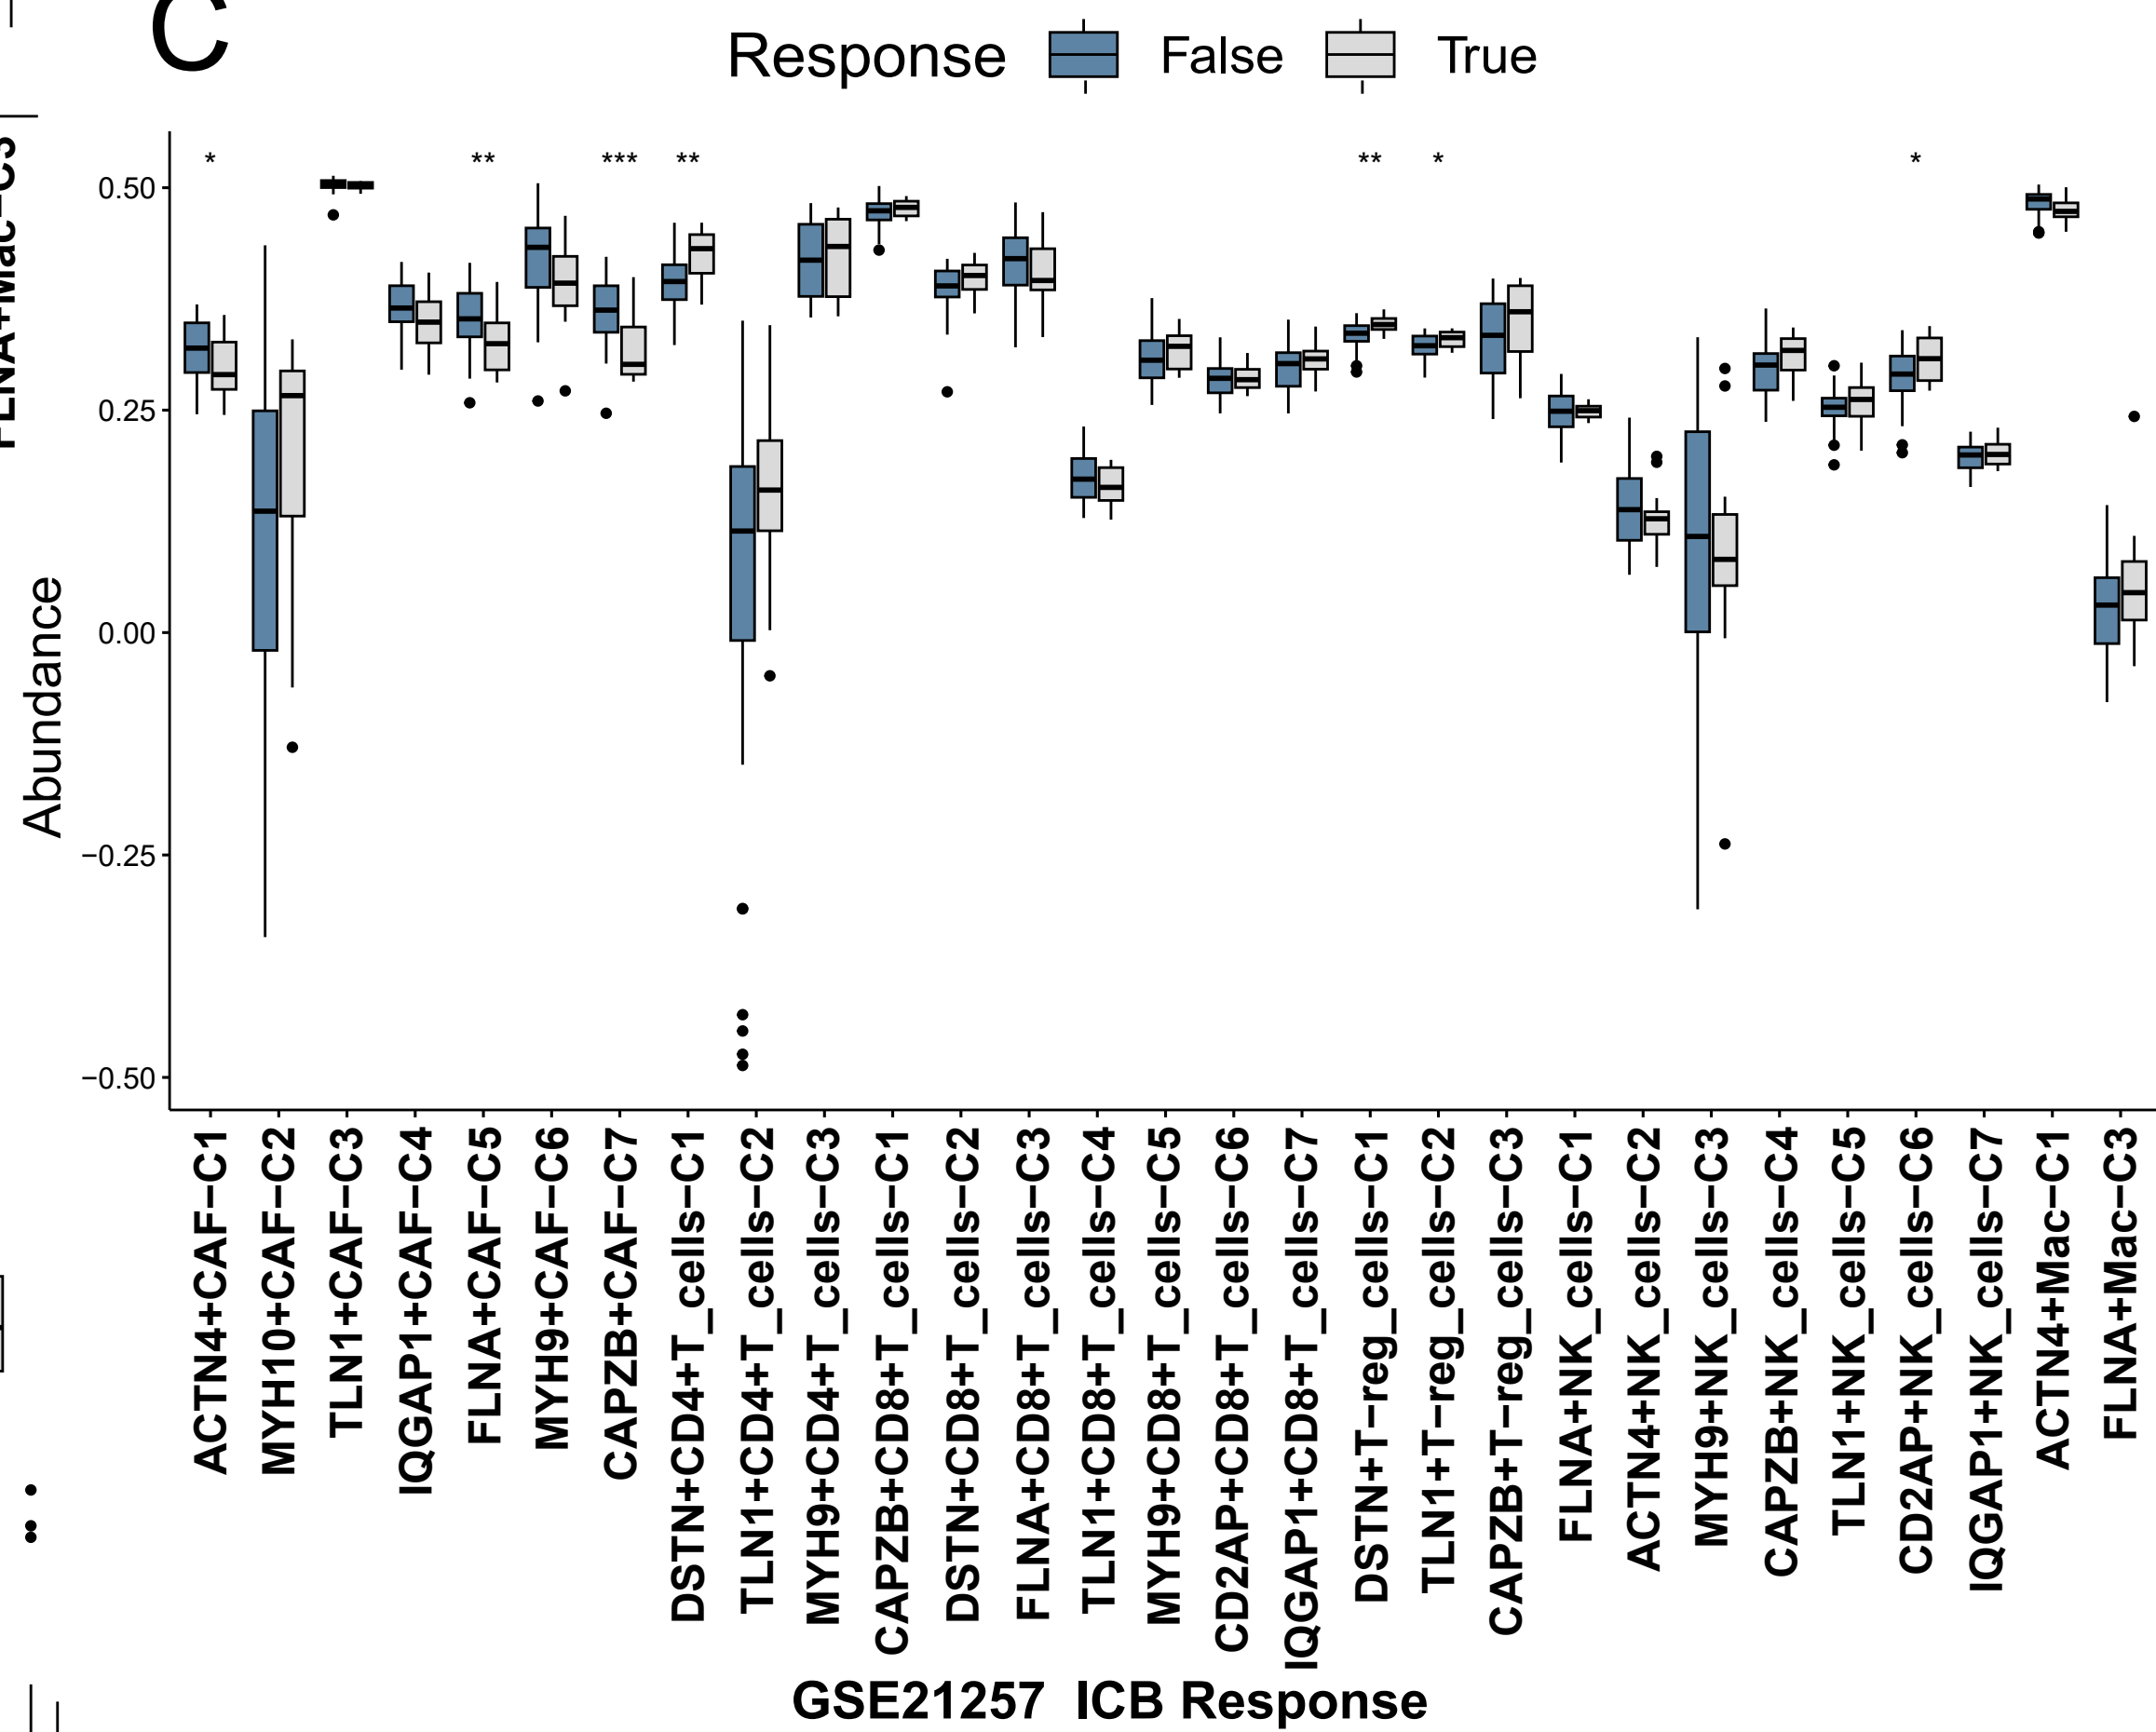

Supplement: Supplementary file 5 [file supplementary]

A

## TARGET

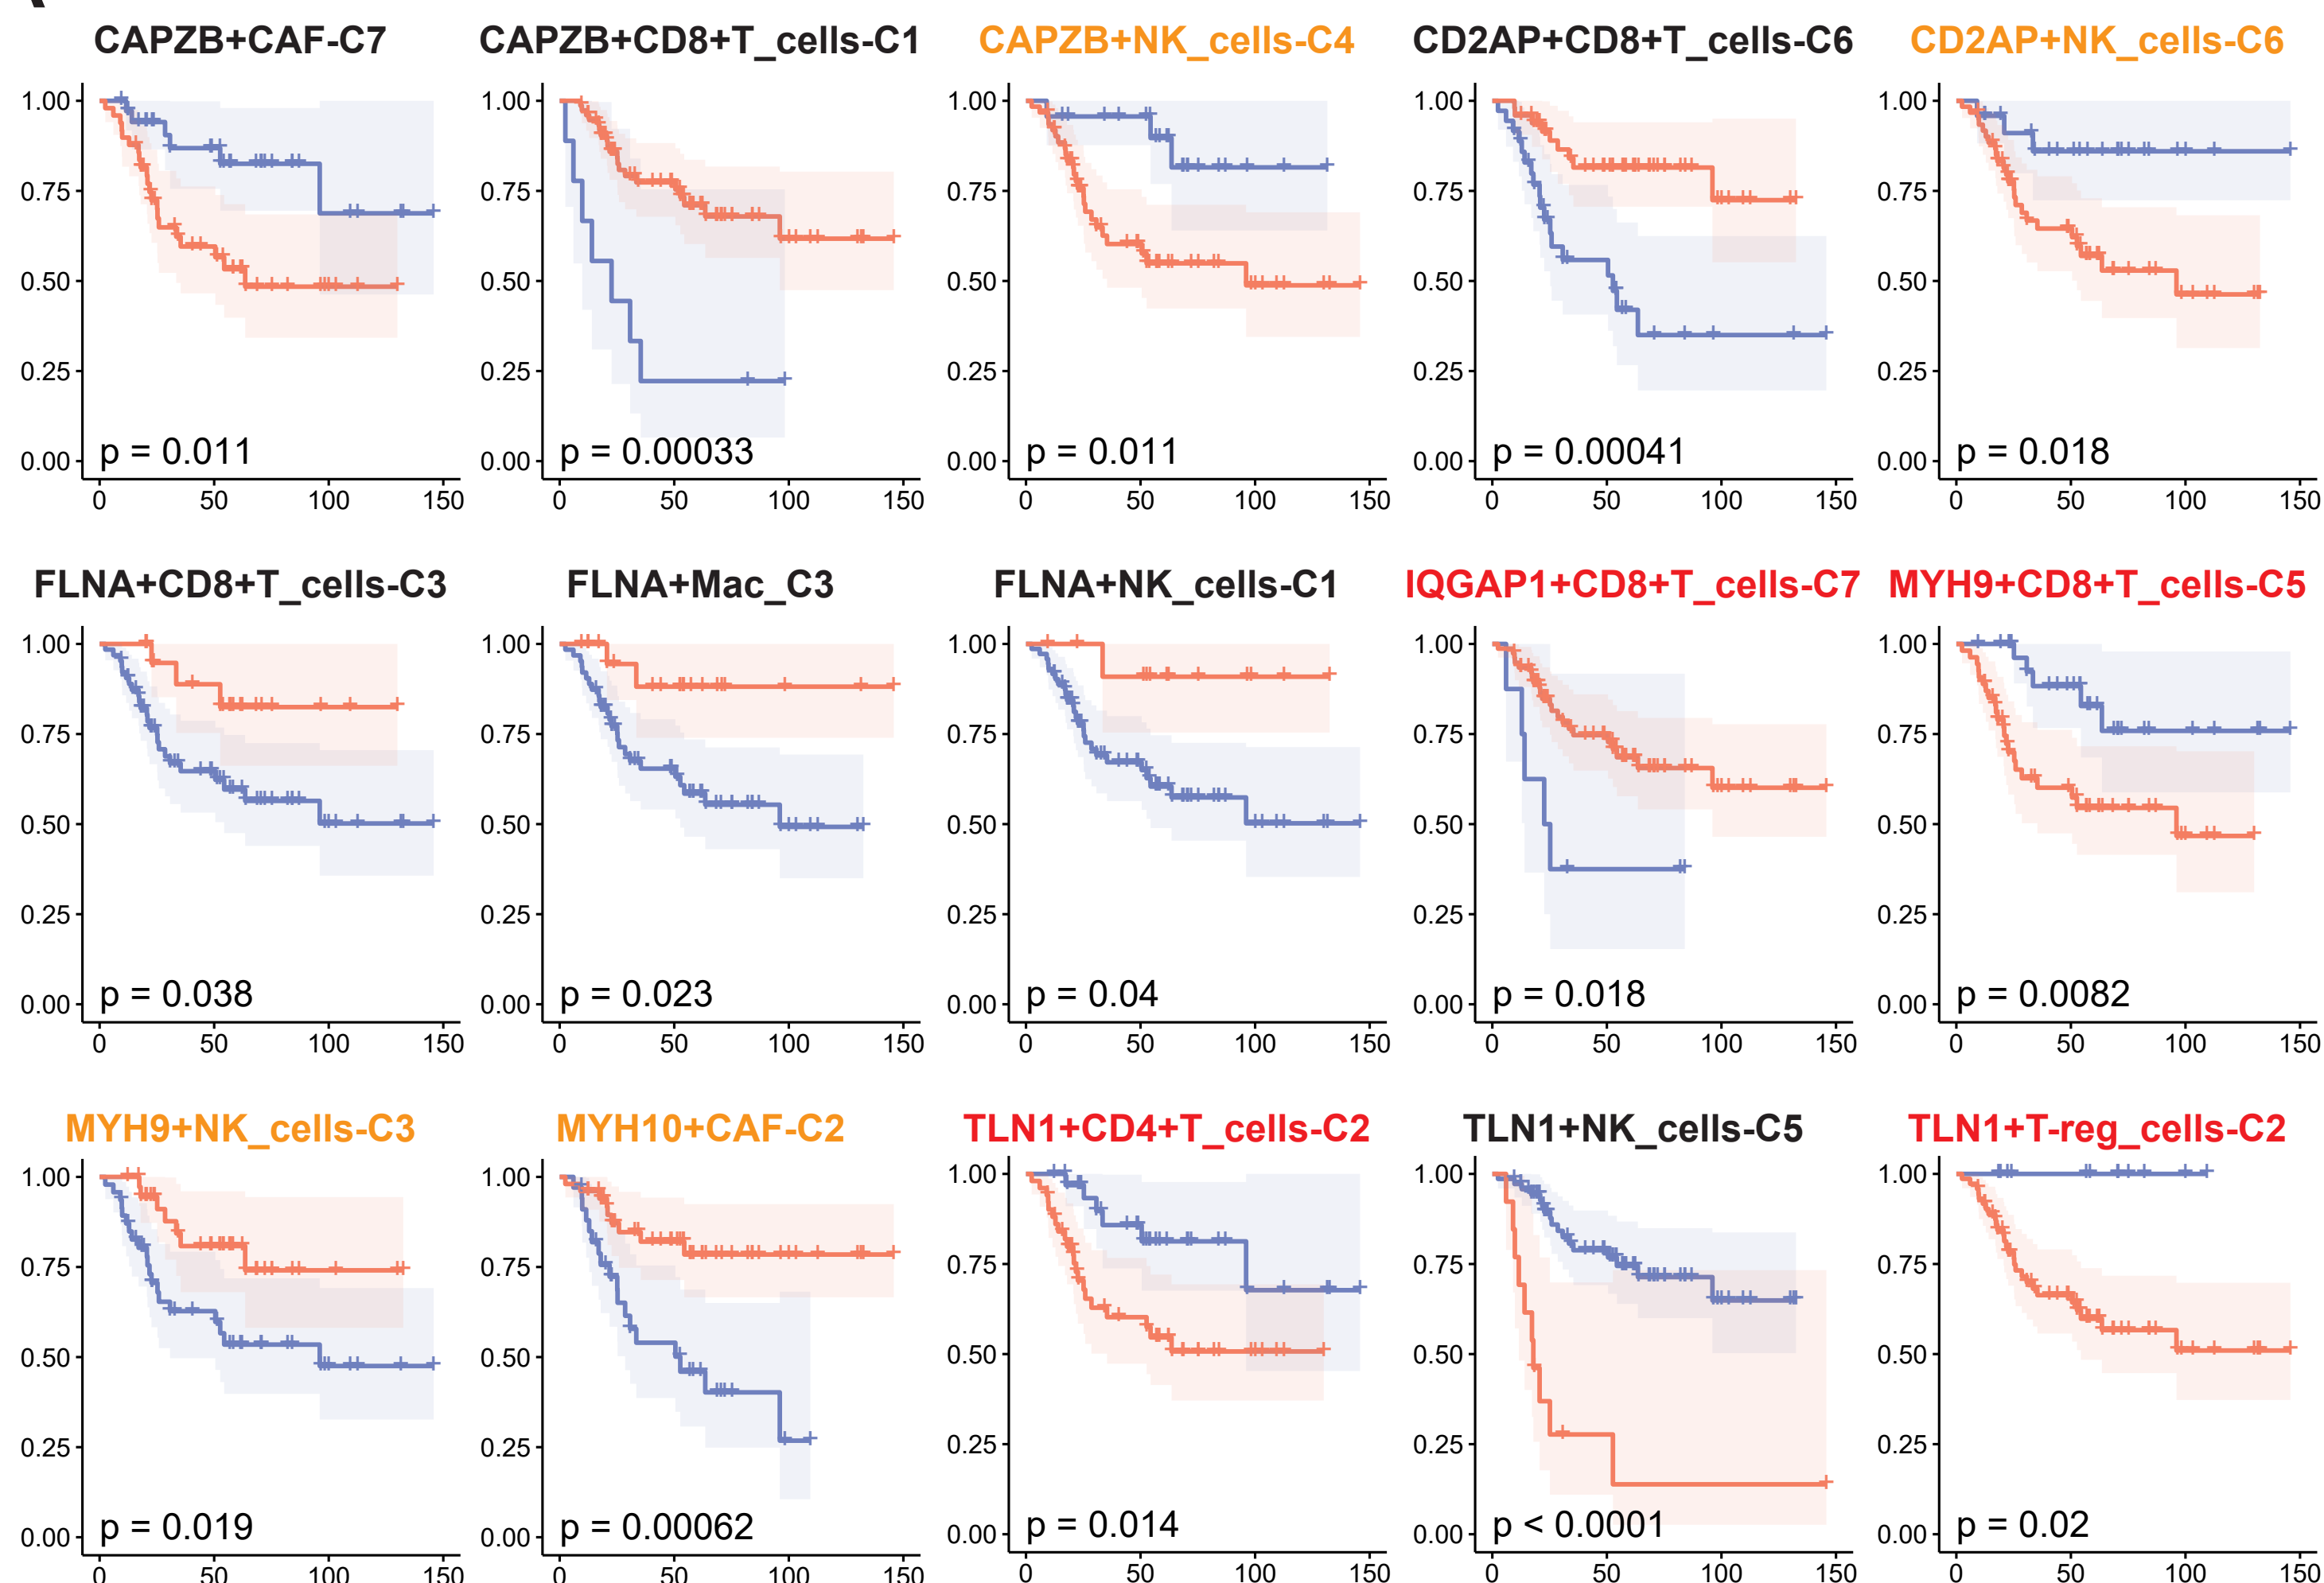

## GSE21257

B

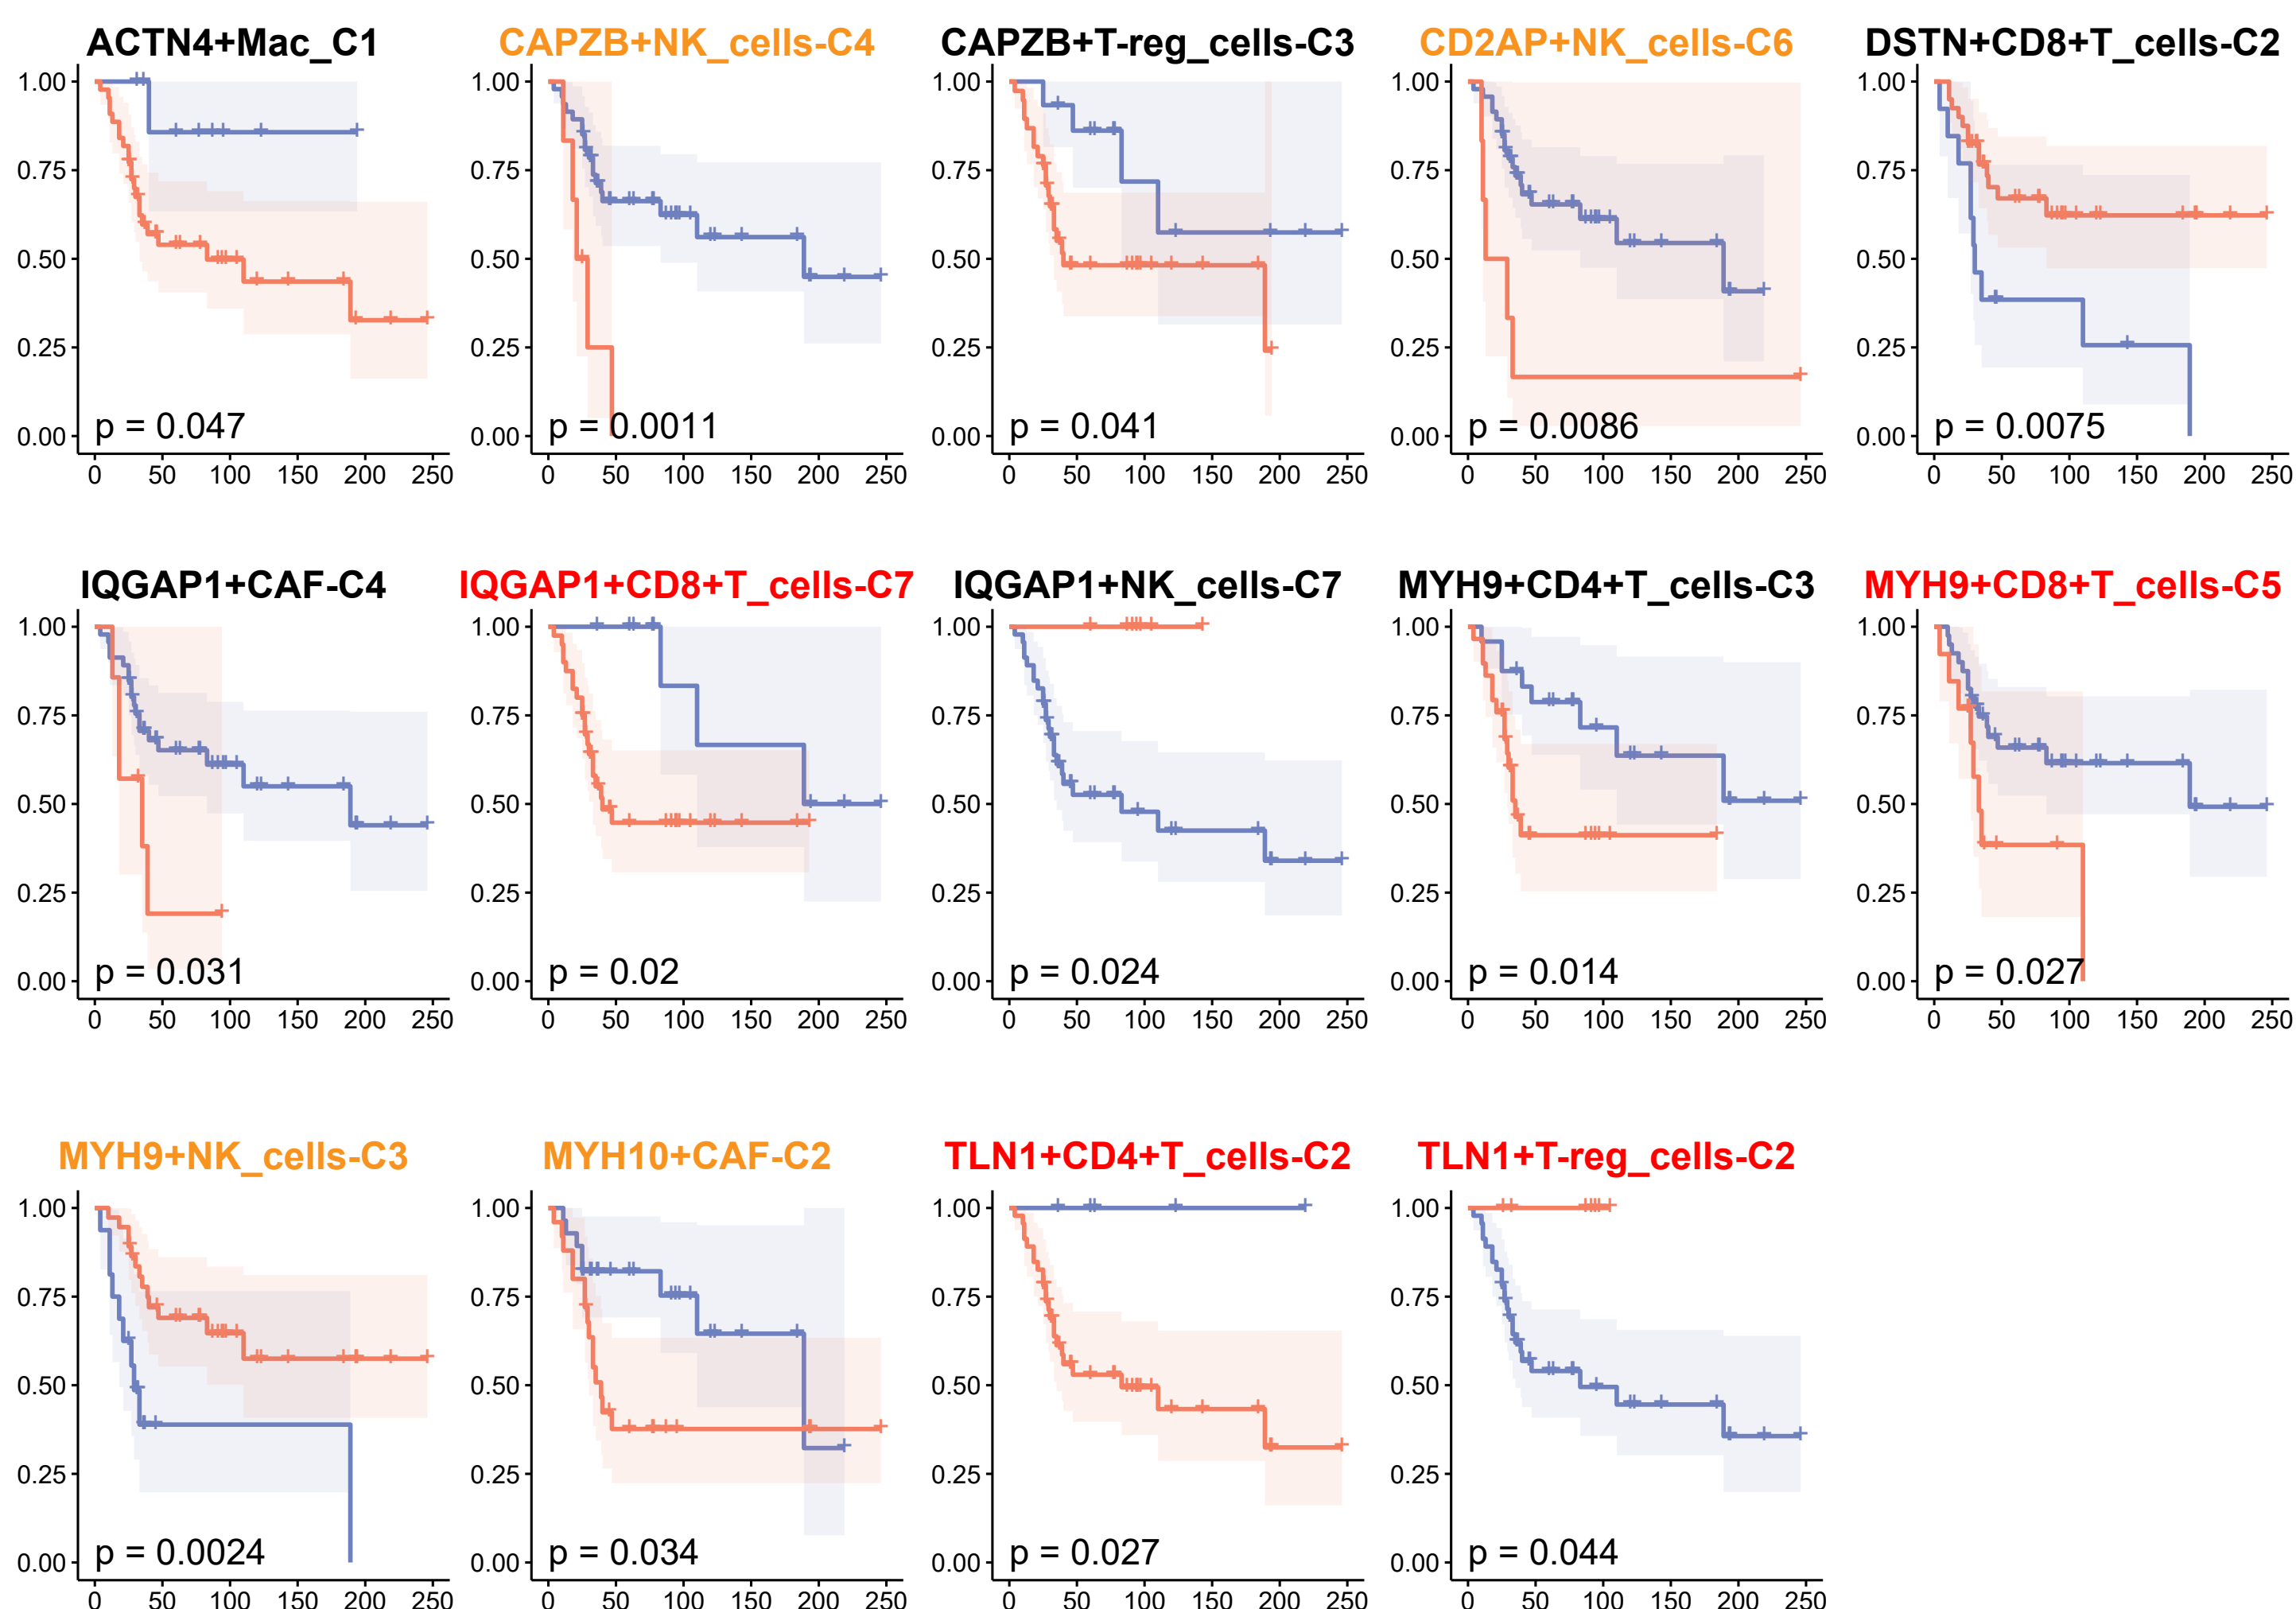

## GSE16091

C

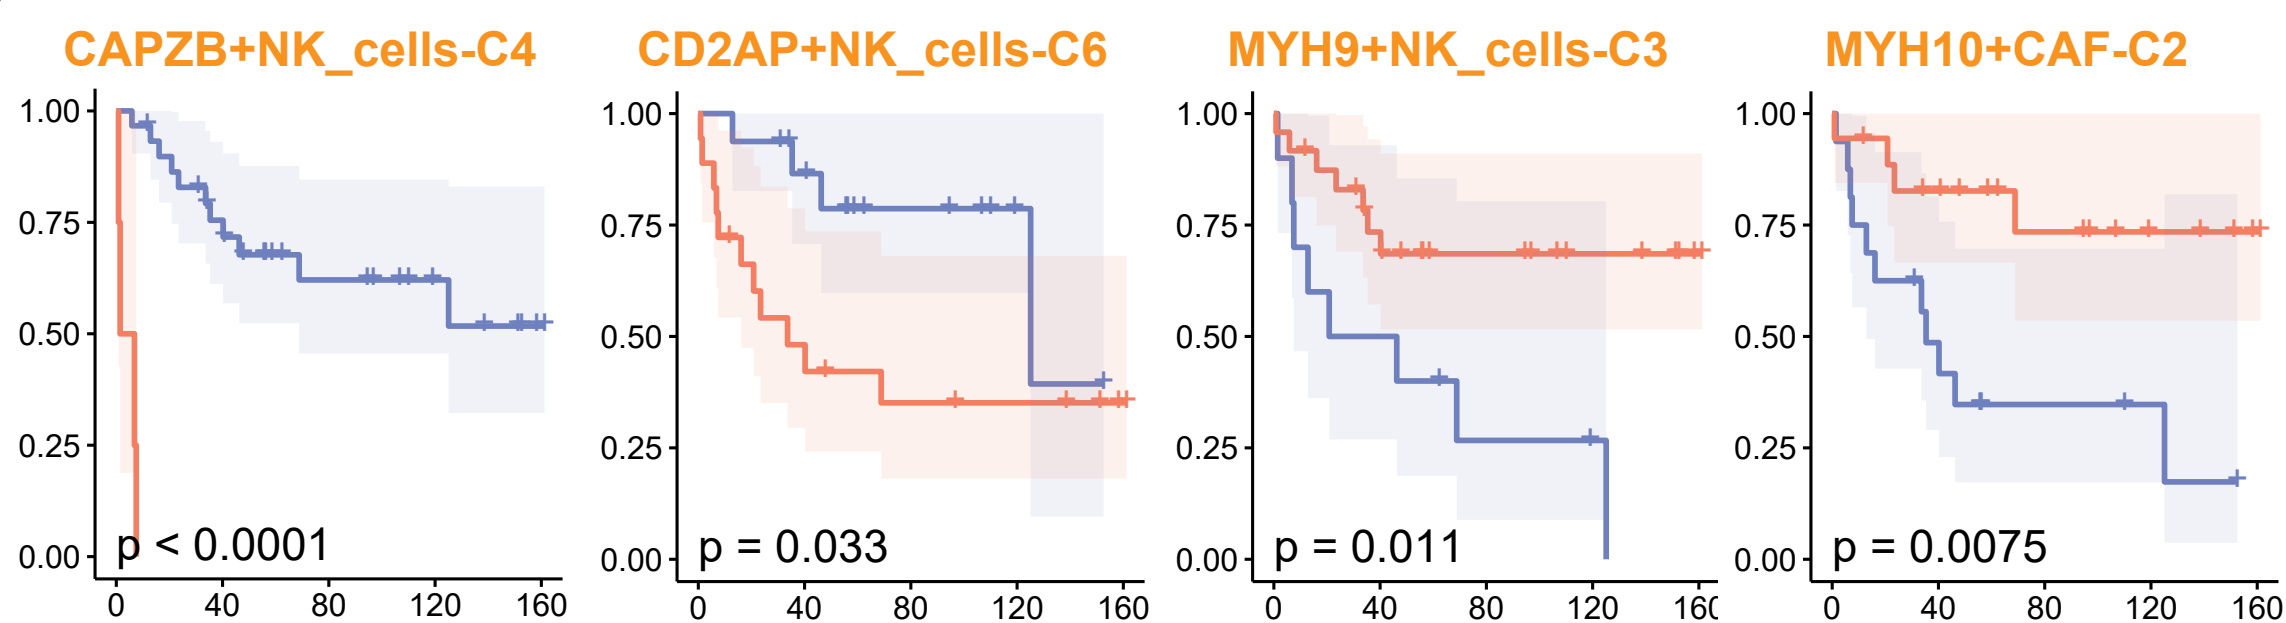

Supplement: Supplementary file 6 [file supplementary]

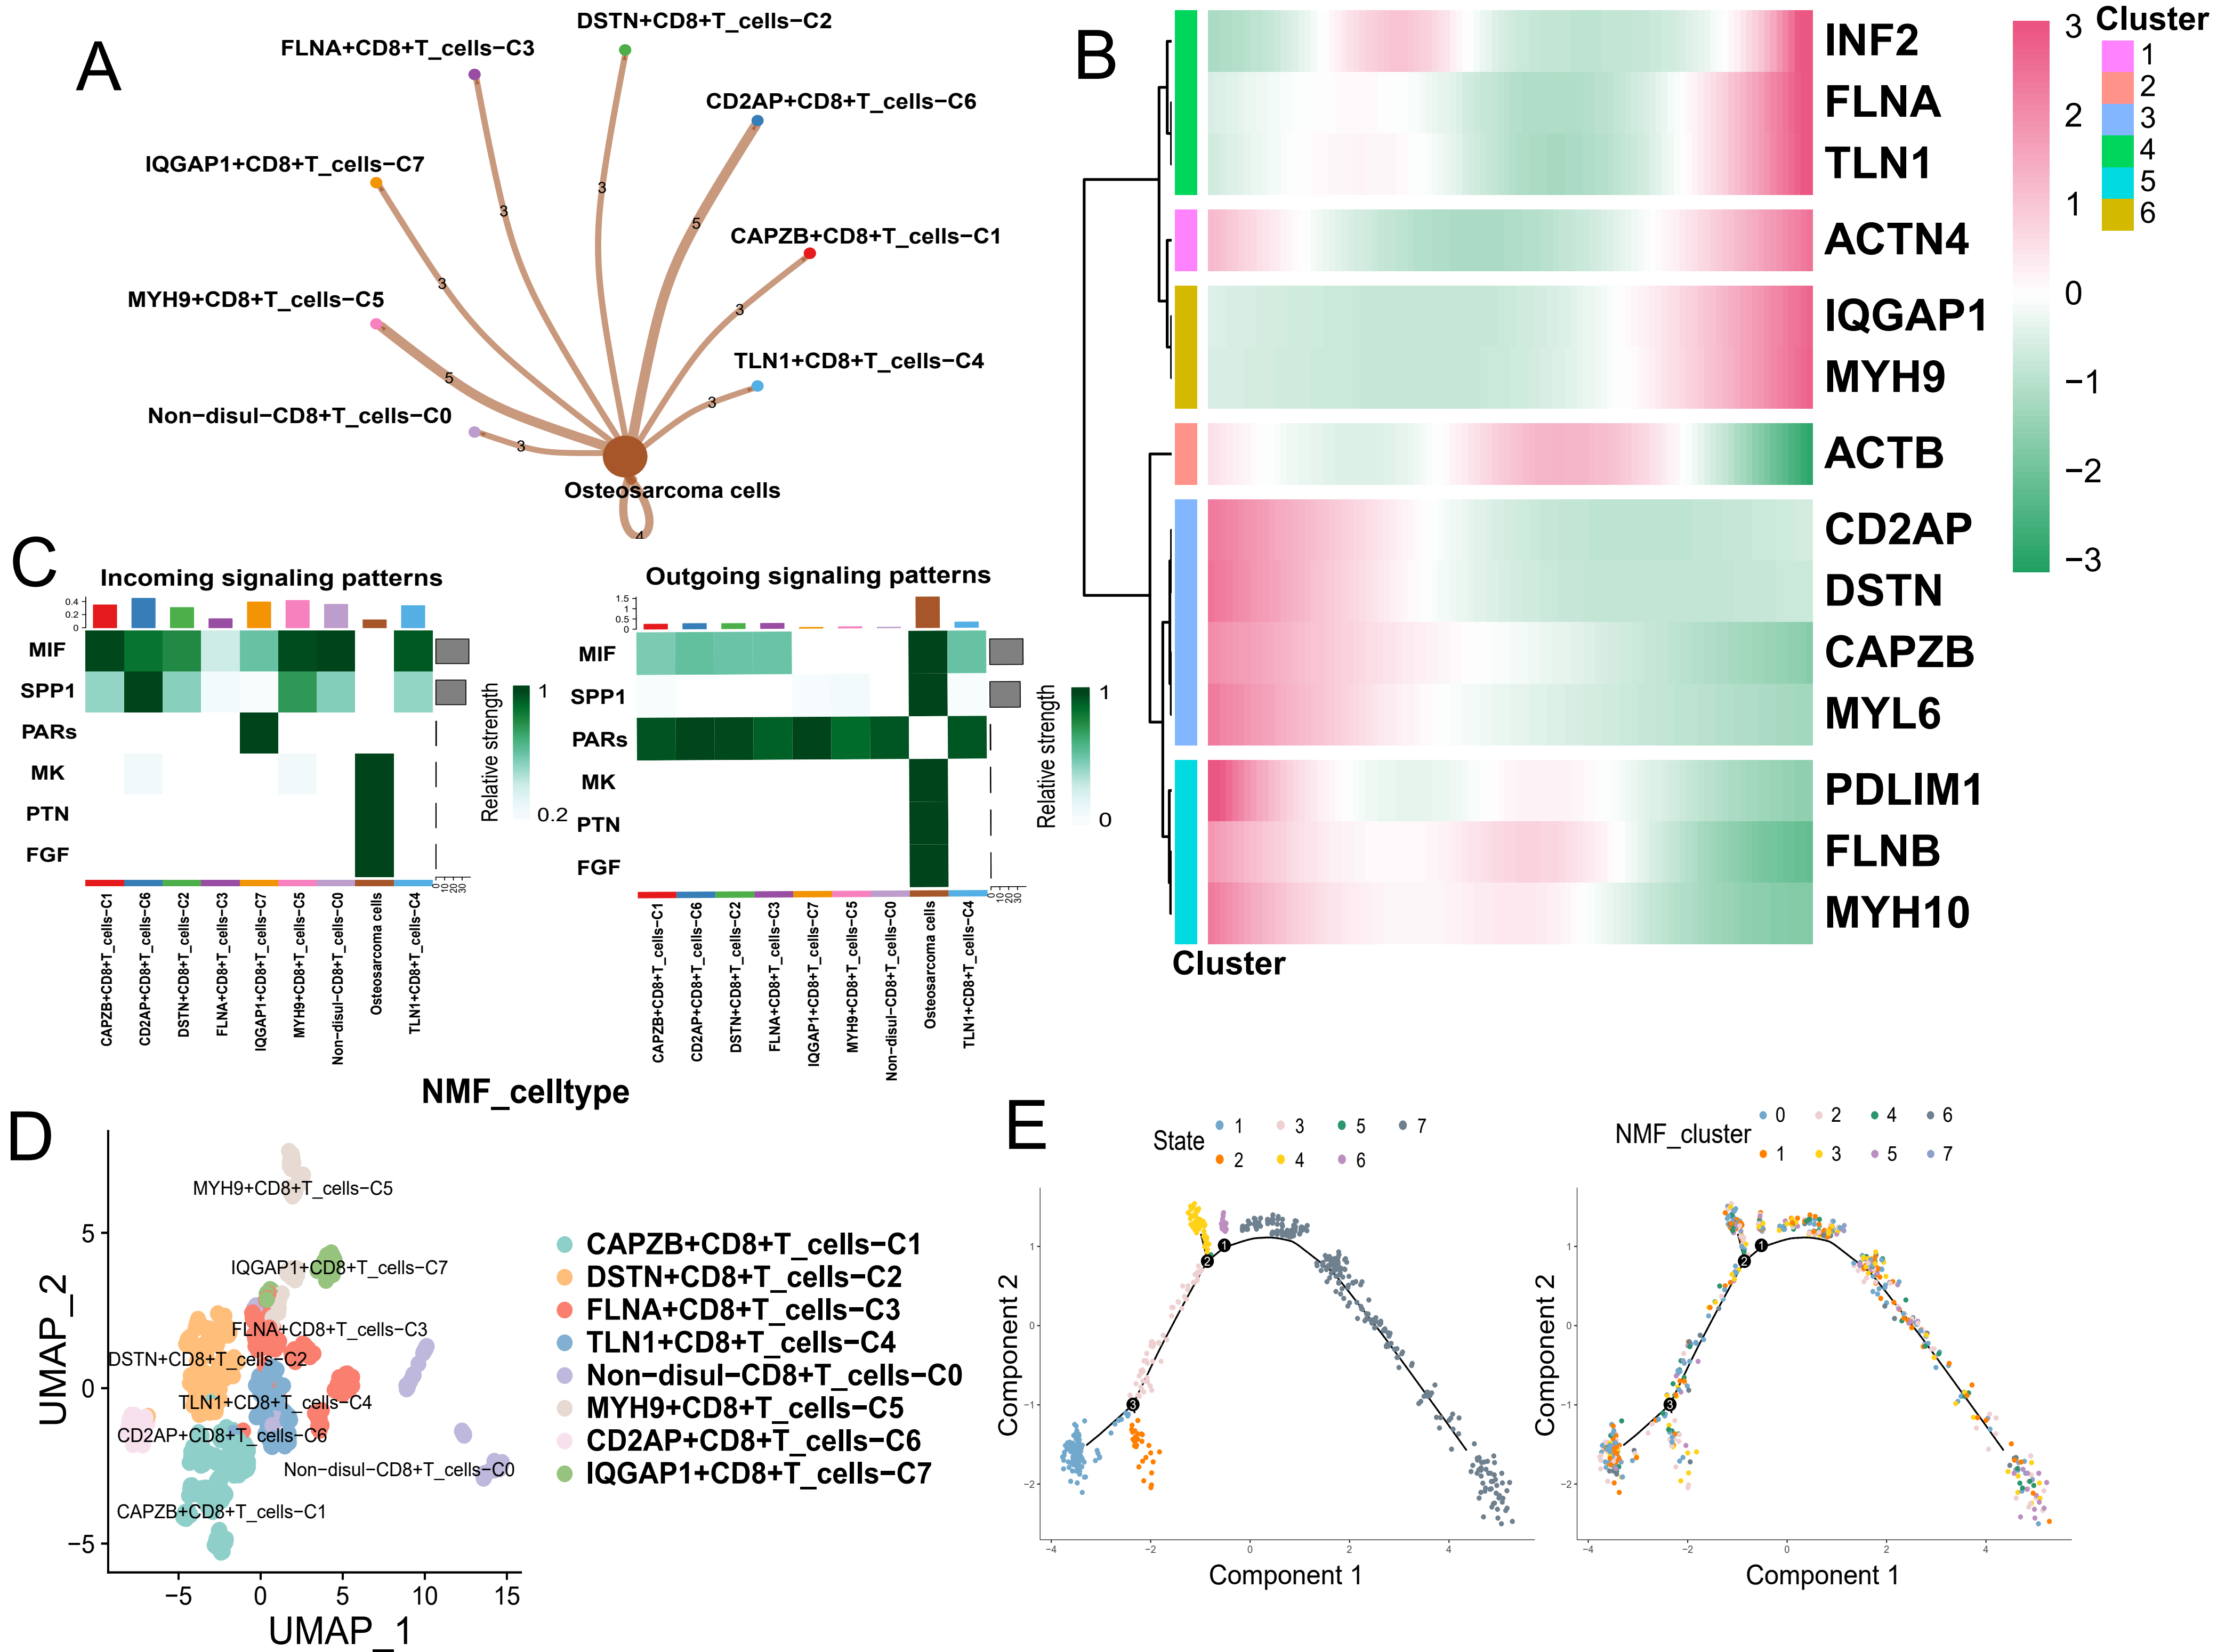

Supplement: Supplementary file 7 [file supplementary]
